# Supplementary material for: [3,3]-Sigmatropic rearrangements of propargyl alkynyl ethers. Synthesis of complex dienoates and unsaturated lactones
Source: Royal Society of Chemistry journal article supplement (doi:10.1039/d2ob02121h), 2023-01-01

## Electronic Supplementary Information

for

### [3,3]-Sigmatropic rearrangements of propargyl alkynyl ethers. Synthesis of complex dienoates and unsaturated lactones.

Juan Sosa, Armen Tudjarian, and Thomas G. Minehan\*

*Department of Chemistry and Biochemistry, California State University– Northridge,  
Northridge, CA 91330*

General Information

pp. S2-S6

Synthetic procedures and spectroscopic data for

pp. S7-S27

<sup>1</sup>H NMR, <sup>13</sup>C NMR spectra for compounds **1a**, **1b**, **1c**, **1d**, **1e**, **1f**, **1g**, **1h**, **1i**, **1j**, **1k**, **1l**, **2a**, **2b**, **2c**, **2d**, **2e**, **2f**, **2g**, **2h**, **2i**, **2j**, **2k**, **2l**, **3a**, **3b**, **3e**, **3f**, **3g**, **3h**, **3i**, **4a**, **4b**, **4e**, **4f**, **4g**, **4h**, **4i**, **6a**, **6b(syn)**, **6b(anti)**, **6c**:

pp. S28-S130

NOESY spectra

**2c** – S59; **2d** – S62; **2e** – S65; **2f** – S68; **2g** – S71; **2h** – S74; **2i** – S77; **2j** – S80; **2l** – S85; **4a** - S102; **4e** – S107; **4g** – S112; **4h** – S115; **4i** – S118; **6a**- S121; **6b(syn)** – S124; **6b (anti)** – S127; **6c** – S130.

## General Information

Distilled water was used in all of the experiments. Organic extracts were dried over  $\text{Na}_2\text{SO}_4$ , filtered, and concentrated using a rotary evaporator at aspirator pressure (20-30 mmHg). Chromatography refers to flash chromatography and was carried out on  $\text{SiO}_2$  (silica gel 60, 230-400 mesh). All glassware used in the reactions described below were flame-dried under vacuum and then flushed with argon gas at room temperature prior to the addition of reagents and solvents.  $^1\text{H}$  and  $^{13}\text{C}\{^1\text{H}\}$  NMR spectra were measured in  $\text{CDCl}_3$  at 400 MHz and 100 MHz, respectively, using  $\text{Me}_4\text{Si}$  as internal standard. Chemical shifts are reported in ppm downfield ( $\delta$ ) from  $\text{Me}_4\text{Si}$ .

### General Procedure A: Preparation of $\alpha$ -alkoxy ketones **1** from propargylic alcohols and diazoketones:

A solution of  $\alpha$ -diazacetophenone (365 mg, 2.5 mmol) in benzene (3 mL) was added dropwise over 2 hours via syringe pump to a solution of propargylic alcohol (3.75 mmol) and indium triflate (210 mg, 0.375 mmol) in benzene (3 mL) at room temperature. The mixture was allowed to stir for an additional 2 hours and was quenched with a saturated solution of  $\text{NaHCO}_3$  (5 mL) and ether (5 mL). The layers were separated, and the aqueous layer was extracted with ether (2 x 10 mL). The combined organic extracts were washed once with saturated aqueous  $\text{NaCl}$  (20 mL), dried over anhydrous  $\text{Na}_2\text{SO}_4$ , and concentrated under reduced pressure to give a crude oil. Purification of the residue by flash chromatography (20:1  $\rightarrow$  10:1 hexanes:  $\text{Et}_2\text{O}$ ) afforded  $\alpha$ -alkoxy ketones **1**.

General Procedure B: Synthesis of  $\alpha$ -alkoxyketones **1** from alcohols and bromoacetic acid:

A solution of alcohol (5 mmol) in THF (5 mL) was added slowly to a solution of NaH (11 mmol) in THF (20 mL) at 0 °C. After 30 minutes, bromoacetic acid (5 mmol) was directly added to the solution at 0 °C, and the mixture was warmed to room temperature. After 10 minutes, the mixture was refluxed for 18 h and then cooled to rt. Water (20 mL) and ether (20 mL) were added, and the layers were separated. The aqueous layer was acidified with concentrated HCl to pH=2. The aqueous layer was extracted with three 30 mL portions of ether and the combined organics were dried over sodium sulfate, filtered and evaporated. The crude acid was dissolved in CH<sub>2</sub>Cl<sub>2</sub> (15 mL) and then EDC (7.48 mmol), N,O-dimethylhydroxylamine (7.48 mmol) and pyridine (2.5 mL) was added. The mixture was stirred overnight and was diluted with saturated NaHCO<sub>3</sub> solution. The layers were separated and the aqueous layer was extracted with three 30 mL portions of ethyl acetate. The combined organics were dried over sodium sulfate, filtered, and evaporated. The crude material was purified by column chromatography (20:1 → 3:1 Hexanes: ethyl acetate) to afford the Weinreb amide as a pale oil. The Weinreb amide was dissolve in THF (10 mL) and cooled to -78 °C. Separately, the Grignard or organolithium reagent (7.5 mmol) was dissolved in THF (10 mL) and cooled to -78 °C. The Grignard or organolithium reagent solution was then cannulated into the THF solution of Weinreb amide at -78 °C and the solution was allowed to warm to rt. The mixture was quenched with a saturated solution of ammonium chloride (10 mL) and the layers were separated. The aqueous layer was extracted with three 30 mL portions of ether and the combined organics were dried over sodium sulfate, filtered and evaporated. Purification of the residue by column chromatography (20:1 → 10:1 Hexanes:ethyl acetate) afforded the  $\alpha$ -alkoxy ketone.

General Procedure C: Synthesis of propargyl-1,1-dichlorovinyl ethers **3** from propargylic alcohols:

The alcohol (10 mmol) was dissolved in pyridine (10 mL) and cooled to 0 °C. Formic acetic anhydride (10 mL) was added. And the mixture was stirred at 0°C for 30 minutes. When TLC had indicated completion of the reaction, the mixture was concentrated *in vacuo* with toluene (10 mL x 5) to remove excess pyridine. The crude material was then taken up in THF (100 mL) and treated with PPh<sub>3</sub> (30 mmol) and heated to 60 °C. CCl<sub>4</sub> (10 mL) was slowly added via syringe pump over 8 hours to the THF solution at 60°C. After 10 hours, the heating bath was removed and the mixture was allowed to cool to rt. The mixture was diluted with a saturated solution of NaHCO<sub>3</sub> (10 mL) and ether (10 mL) and the layers were separated. The aqueous layer was extracted with three 30 mL portions of ether and the combined organics were dried over sodium sulfate, filtered and evaporated. Purification of the residue by column chromatography (Hexanes → 30:1 hexanes: ether) afforded the 1,1-dichlorovinyl ether.

General Procedure D: Conversion of  $\alpha$ -alkoxy ketones **1** to rearranged dienes **2**:

A solution of hexamethyldisilazane (314  $\mu$ L, 1.5 mmol) in THF (1 mL) was cooled to 0 °C and treated dropwise with *n*-butyllithium (0.75 mL, 2M in cyclohexane, 1.5 mmol). After 10 minutes, the solution was cooled to -78 °C and a solution of  $\alpha$ -alkoxy ketone **1** (1 mmol) in THF (2 mL) was added dropwise. The solution was allowed to stir at -78 °C for one hour. Then a solution of Comins' reagent (589 mg, 1.5 mmol) in 2:1 THF:HMPA (2 mL) was added rapidly (1s) and the solution was allowed to warm to room temperature and stir for 30 minutes. Then a saturated solution of NaHCO<sub>3</sub> (5 mL) and ether (5 mL) was added. The layers were separated, and the aqueous layer was extracted with ether (2 x 10 mL). The combined organic extracts were washed with a saturated aqueous solution of copper sulfate (2 x 10 mL) and saturated aqueous NaCl (1 x 20 mL), dried over anhydrous Na<sub>2</sub>SO<sub>4</sub>, and concentrated under reduced pressure to give a crude oil. The crude material was rapidly filtered through a pad of silica gel



with 10:1 hexanes/ether and the fractions collected were concentrated *in vacuo*. The intermediate enol triflate was dissolved in THF (3 mL) and cooled to -78 °C. A 1M solution of potassium tert-butoxide in THF (2.5 equiv, 2.5 ml) was then added and the solution was stirred at -78 °C for 30 minutes, at which time TLC indicated conversion to a higher *rf* spot. The cooling bath was removed, and the mixture was allowed to warm to room temperature. Then a saturated solution of NaHCO<sub>3</sub> (5 mL) and ether (5 mL) was added. The layers were separated, and the aqueous layer was extracted with ether (2 x 10 mL). The combined organic extracts were washed once with saturated aqueous NaCl (20 mL), dried over anhydrous Na<sub>2</sub>SO<sub>4</sub>, and concentrated under reduced pressure to give a crude oil. Purification of the residue by flash chromatography (100:1 → 10:1 hexanes: Et<sub>2</sub>O) afforded dienes **2**.

General Procedure E: Conversion of propargyl-1,1-dichlorovinyl ethers **3** to unsaturated dienoates **4**

The propargyl-1,1-dichlorovinyl ether (1 mmol) was dissolved in THF (1 mL) and cooled to -78°C. Then n-butyllithium (1.1 mL, 2.2 mmol, 2M in cyclohexane) was added dropwise and the brown mixture was stirred at -78 °C for 15 minutes. Then methanol (1 mL) was added rapidly and the mixture was allowed to warm to room temperature. A solution of saturated sodium bicarbonate (10 mL) and ether (10 mL) were added and the layers were separated. The aqueous layer was extracted with three 30 mL portions of ether and the combined organics were dried over sodium sulfate, filtered and evaporated. Purification of the residue by column chromatography (100:1 → 10:1 hexanes: ether) afforded the unsaturated dienoate **4**.

General Procedure F: Conversion of propargyl-1,1-dichlorovinyl ethers **3** to unsaturated lactones **6**

The propargyl-1,1-dichlorovinyl ether (1 mmol) was dissolved in THF (1 mL) and cooled to -78°C. Then n-butyllithium (1.1 mL, 2.2 mmol, 2M in cyclohexane) was added dropwise and the brown mixture was stirred at -78 °C for 15 minutes. The mixture was then allowed to warm to 0 °C and

stirred for 30 minutes. The mixture was then allowed to warm to rt and stirred for 10 minutes. At this point the appropriate ketone or aldehyde (1.8 mmol) was added dropwise and the mixture was stirred for one hour at rt. A solution of saturated sodium bicarbonate (10 mL) and ether (10 mL) were added and the layers were separated. The aqueous layer was extracted with three 30 mL portions of ether and the combined organics were dried over sodium sulfate, filtered and evaporated. Purification of the residue by column chromatography (20:1 → 3:1 hexanes: ethyl acetate) afforded the unsaturated lactones **6**.

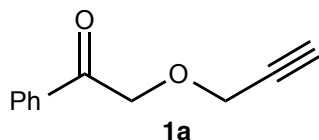

**1a** (spectra pages S28 and S29): Prepared from propargyl alcohol and diazoacetophenone according to General procedure A. Purification of the residue by flash chromatography (SiO<sub>2</sub>, 100:1→20:1 Hexanes:EtOAc) afforded **1a** (221 mg, 1.27 mmol, 51%) as a colorless oil. **1a**: <sup>1</sup>H NMR (400 MHz, CDCl<sub>3</sub>)

δ 7.95 (d, *J*=6.32 Hz, 2H); 7.58 (t, *J*=6.8 Hz, 1H); 7.50 (t, *J*=7.8 Hz, 2H), 4.89 (s, 2H); 4.39 (d, *J*=2.4 Hz, 2H); 2.52 (t, *J*=2.4 Hz, 1H).

<sup>13</sup>C{<sup>1</sup>H} NMR (100 MHz, CDCl<sub>3</sub>) δ 195.5, 134.8, 134.7, 133.6, 129.2, 128.7, 127.8, 78.8, 75.6, 71.5, 58.4. IR: 2902 cm<sup>-1</sup>, 2119, 1695, 1597. Spectral data matches that of known compound, reference: Yadav, J. S.; Reddy, B. V. S.; Vishnumurthy, P. *Tetrahedron Lett.* **2003**, *44*, 5691-5694.

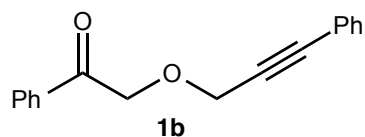

**1b** (spectra pages S30 and S31): Prepared from 3-phenyl-2-propyn-1-ol and diazoacetophenone according to General Procedure A: Purification of the residue by flash chromatography (SiO<sub>2</sub>, 100:1→10:1

hexanes:EtOAc) afforded **1b** (432 mg, 1.73 mmol, 69%) as a pale yellow oil. **1b**: <sup>1</sup>H NMR (400 MHz, CDCl<sub>3</sub>) δ 7.95 (d, *J*=7.86 Hz, 2H); 7.57-7.44 (m, 5H); 7.33-7.31 (m, 3H); 4.95 (s, 2H); 4.61 (s, 2H). <sup>13</sup>C{<sup>1</sup>H} NMR (100 MHz, CDCl<sub>3</sub>)

δ 195.7, 134.9, 134.8, 133.6, 131.8, 129.2, 128.7, 128.6, 128.3, 127.9, 127.8, 122.3, 87.3, 84.2, 75.0, 71.7, 59.2. IR: 2977 cm<sup>-1</sup>, 2226, 1692, 1597. Spectral data matches that of known compound, reference: Fu, W.; Nie, M; Wang, A.; Cao, Z.; Tang, W. *Angew. Chem. Int. Ed.* **2015**, *54*, 2520-2524.

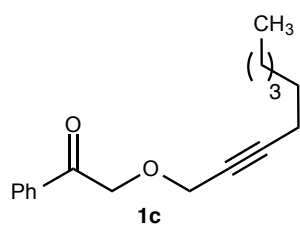

**1c** (spectra pages S32 and S33): Prepared from 2-nonyne-1-ol and diazoacetophenone according to General

Procedure A: Purification of the residue by flash chromatography (SiO<sub>2</sub>, 100:1 → 10:1 hexanes:EtOAc) afforded

**1c** (310 mg, 1.2 mmol, 48%) as a colorless oil. **1c**: <sup>1</sup>H NMR (400 MHz, CDCl<sub>3</sub>) δ 7.88 (d, *J*=8.1 Hz, 2H); 7.58

(t, *J*=6.7 Hz, 1H); 7.46 (t, *J*=7.8 Hz, 2H); 4.83 (s, 2H); 4.33 (t, *J*=2.2 Hz, 2H); 2.21 (m, 2H); 1.47 (m, 2H); 1.37

(m, 2H); 1.28 (m, 4H); 0.97 (t, *J*=6.8 Hz, 3H). <sup>13</sup>C{<sup>1</sup>H} NMR (100 MHz, CDCl<sub>3</sub>) δ 195.8, 134.9, 133.5, 128.6, 127.8, 88.4, 75.0, 71.4,

59.0, 31.2, 28.5, 28.4, 22.5, 18.7, 13.9. HRMS (QTOF) calculated for C<sub>17</sub>H<sub>22</sub>NaO<sub>2</sub> 281.1517, found 281.1513 (M+Na)<sup>+</sup>. IR: 2981 cm<sup>-1</sup>,

2936, 2923, 2864, 2844, 2220, 1699, 1598.

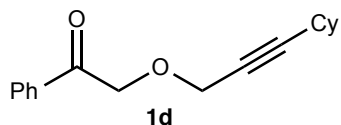

**1d** (spectra pages S34 and S35): Prepared according from 3-cyclohexyl-2-propyn-1-ol and

diazoacetophenone according to General Procedure A: Purification of the residue by flash chromatography

(SiO<sub>2</sub>, 100:1 → 10:1 hexanes:EtOAc) afforded **1d** (545 mg, 2.13 mmol, 85%) as a light yellow oil. **1d**: <sup>1</sup>H

NMR (400 MHz, CDCl<sub>3</sub>) δ 7.94 (d, *J*=8.1 Hz, 2H); 7.61 (t, *J*=7.4 Hz, 1H); 7.47 (t, *J*=9.2 Hz, 2H); 4.85 (s, 2H); 4.37 (d, *J*=2.0 Hz, 2H);

2.41 (m, 1H); 1.80 (m, 2H); 1.72 (m, 2H); 1.52-1.40 (m, 3H); 1.29 (m, 3H). <sup>13</sup>C{<sup>1</sup>H} NMR (100 MHz, CDCl<sub>3</sub>) δ 195.9; 134.9, 133.5,

128.7, 128.6, 127.9, 92.4, 74.8, 71.4, 59.0, 32.5, 29.0, 25.8, 24.8. HRMS (QTOF) calculated for C<sub>17</sub>H<sub>20</sub>NaO<sub>2</sub> 279.1361, found 279.1354

(M+Na)<sup>+</sup>. IR: 2928 cm<sup>-1</sup>, 2853, 2225, 1699, 1598.

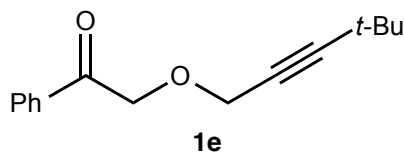

**1e** (spectra pages S36 and S37): Prepared according from 4,4-dimethyl-2-pentyn-1-ol and diazoacetophenone according to General Procedure A: Purification of the residue by flash chromatography (SiO<sub>2</sub>, 100:1→10:1 hexanes:EtOAc) afforded **1e** (402 mg, 1.75 mmol, 70%) as a

light yellow oil. **1e**: <sup>1</sup>H NMR (400 MHz, CDCl<sub>3</sub>) δ 7.94 (d, *J*=8.1 Hz, 2H); 7.58 (t, *J*=7.4 Hz, 1H); 7.46 (t, *J*=6.6 Hz, 2H); 4.82 (s, 2H); 4.34 (s, 2H); 1.22 (s, 9H). <sup>13</sup>C{<sup>1</sup>H} NMR (100 MHz, CDCl<sub>3</sub>) δ 195.9, 134.9, 133.5, 128.7, 127.9, 96.5, 73.4, 71.5, 59.0, 30.8, 27.5. IR: 2982 cm<sup>-1</sup>, 2865, 2227, 1699, 1598. Spectral data matches that of known compound, reference: Zhang, X.-W.; Zhu, M.-H.; Zeng, H.-X.; Li, Q.-Y.; Liu, W.-B. *Angew. Chem., Int. Ed.* **2021**, *60*, 27225-27229.

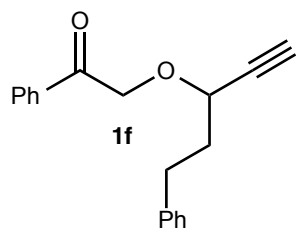

**1f** (spectra pages S38 and S39): Prepared from 5-phenyl-1-pentyne-3-ol and diazoacetophenone according to General Procedure A: Purification of the residue by flash chromatography (SiO<sub>2</sub>, 100:1→10:1 hexanes:EtOAc) afforded **1f** (570 mg, 2.05 mmol, 82%) as a viscous colorless oil. **1f**: <sup>1</sup>H NMR (400 MHz, CDCl<sub>3</sub>) δ 7.99 (d,

*J*=8.2 Hz, 2H); 7.61 (t, *J*=5.5 Hz, 1H); 7.50 (t, *J*=7.5 Hz, 2H); 7.30 (q, *J*=5.4 Hz, 2H); 7.26 (m, 3H); 5.04 (d, *J*=16.5 Hz, 1H); 4.86 (d, *J*=16.5 Hz, 1H); 4.32 (td, *J*=2.1, 6.5 Hz, 1H); 2.91 (t, *J*=7.9 Hz, 2H); 2.56 (d, *J*=2.1 Hz, 1H); 2.28-2.11 (m, 2H). <sup>13</sup>C{<sup>1</sup>H} NMR (100 MHz, CDCl<sub>3</sub>) δ 195.8, 141.2, 135.0, 133.5, 128.9, 128.7, 128.5, 128.4, 128.3, 128.0, 125.9, 81.8, 75.2, 71.0, 69.2, 37.0, 31.2. HRMS (QTOF) calculated for C<sub>19</sub>H<sub>19</sub>O<sub>2</sub> 279.1385, found 279.1389 (M+H)<sup>+</sup>. IR: 2981 cm<sup>-1</sup>, 2873, 2938, 2922, 2865, 2844, 2221, 1698, 1598.

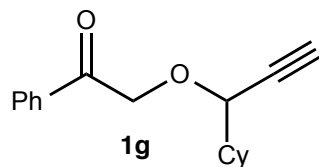

**1g** (spectra pages S40 and S41): Prepared from  $\alpha$ -ethynyl cyclohexanemethanol and diazoacetophenone according to General Procedure A: Purification of the residue by flash chromatography (SiO<sub>2</sub>, 100:1  $\rightarrow$  10:1 hexanes:EtOAc) afforded **1g** (576 mg, 2.25 mmol, 90%) as a pale oil. **1g**: <sup>1</sup>H NMR (400 MHz, CDCl<sub>3</sub>)  $\delta$  7.98

(d,  $J=7.9$  Hz, 2H); 7.59 (t,  $J=6.1$  Hz, 1H); 7.48 (t,  $J=8.4$  Hz, 2H); 4.98 (d,  $J=16.4$  Hz, 1H); 4.83 (d,  $J=16.4$  Hz, 1H); 4.10 (dd,  $J=2.1, 6.2$  Hz, 1H); 2.5 (d,  $J=2.1$  Hz, 1H); 1.94 (m, 2H); 1.77 (m, 3H); 1.68 (m, 1H); 1.28-1.15 (m, 5H). <sup>13</sup>C{<sup>1</sup>H} NMR (100 MHz, CDCl<sub>3</sub>)  $\delta$  196.1; 135.0, 133.4, 128.6, 128.0, 81.1, 75.5, 74.7, 71.1, 42.3, 28.9, 28.2, 26.3, 25.9, 25.8. HRMS (QTOF) calculated for C<sub>17</sub>H<sub>20</sub>NaO<sub>2</sub> 279.1361, found 279.1358 (M+Na)<sup>+</sup>. IR: 2924 cm<sup>-1</sup>, 2852, 2222, 1701, 1598.

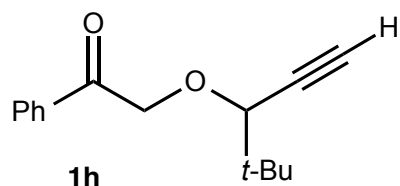

**1h** (spectra pages S42 and S43): Prepared from  $\alpha$ -trimethylsilylethynyl 4,4-dimethyl-pentyn-3-ol and diazoacetophenone according to General Procedure A: Purification of the residue by flash chromatography (SiO<sub>2</sub>, 100:1  $\rightarrow$  10:1 hexanes:EtOAc) afforded **1h** (528 mg, 1.75 mmol, 70%) as a pale

oil. **1h**: <sup>1</sup>H NMR (400 MHz, CDCl<sub>3</sub>)  $\delta$  7.98 (d,  $J=6.3$  Hz, 2H); 7.61 (t,  $J=6.7$  Hz, 1H); 7.50 (t,  $J=7.6$  Hz, 2H); 5.00 (d,  $J=16.2$  Hz, 1H); 4.81 (d,  $J=16.2$  Hz, 1H); 3.95 (d,  $J=2.1$  Hz, 1H); 2.48 (d,  $J=2.1$  Hz, 1H); 1.06 (s, 9H). <sup>13</sup>C{<sup>1</sup>H} NMR (100 MHz, CDCl<sub>3</sub>)  $\delta$  196.5, 135.2, 133.4, 128.6, 128.2, 80.8, 78.6, 75.5, 71.6, 35.5, 30.9, 25.6. HRMS (QTOF) calculated for C<sub>15</sub>H<sub>19</sub>O<sub>2</sub> 231.1385, found 231.1384 (M+H)<sup>+</sup>. IR: 2981 cm<sup>-1</sup>, 2972, 2922, 2866, 2844, 2237, 1701, 1598.

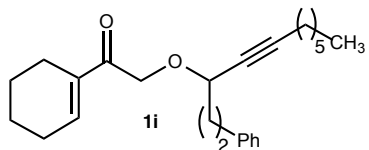

**1i** (spectra pages S45 and S46): Prepared from 1-phenyl-3-hydroxy undec-4-yne and diazo-1-acetylcyclohexenone according to General Procedure A: Purification of the residue by flash chromatography (SiO<sub>2</sub>, 100:1 → 10:1 hexanes:EtOAc) afforded **1i** (457 mg, 1.25 mmol, 50%) as a yellow

oil. **1i**: <sup>1</sup>H NMR (400 MHz, CDCl<sub>3</sub>) δ 7.31-7.20 (m, 5H); 6.91 (s, 1H); 4.68 (d, *J*= 15.8 Hz, 1H); 4.53 (d, *J*=15.8 Hz, 1H); 4.22 (t, *J*=6.5 Hz, 1H); 2.84 (t, *J*=7.9 Hz, 2H); 2.26 (m, 6H); 2.06 (m, 2H); 1.54 (m, 4H); 1.51 (m, 2H); 1.45 (m, 2H); 1.32 (m, 4H); 0.92 (t, *J*= 6.8 Hz, 3H). <sup>13</sup>C{<sup>1</sup>H} NMR (100 MHz, CDCl<sub>3</sub>) δ 196.9, 141.7, 140.3, 137.6, 128.5, 128.4, 128.3, 125.8; 87.6, 78.2, 69.9, 69.5, 37.5, 31.5, 31.3, 28.6, 28.5, 26.0, 22.9, 22.6, 21.8, 21.5, 18.7, 14.0. HRMS (QTOF) calculated for C<sub>25</sub>H<sub>34</sub>NaO<sub>2</sub> 389.2457, found 389.2454 (M+Na)<sup>+</sup>. IR: 2929 cm<sup>-1</sup>, 2860, 2229, 1679, 1636, 1603.

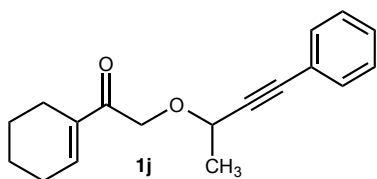

**1j** (spectra pages S47 and S48): Prepared from 4-phenyl-3-butyn-2-ol and diazo-1-acetylcyclohexenone according to General Procedure A: Purification of the residue by flash chromatography (SiO<sub>2</sub>, 100:1 → 10:1 hexanes : EtOAc) afforded **1j** (270 mg, 1.0 mmol, 40%) as a yellow oil. **1j**: <sup>1</sup>H NMR (400

MHz, CDCl<sub>3</sub>) δ 7.41-7.40 (m, 2H); 7.30-7.28 (m, 3H); 6.91 (m, 1H); 4.72 (d, *J*= 16.0 Hz, 1H); 4.60-4.52 (m, 2H); 2.26 (m, 4H); 1.64-1.57 (m, 4H); 1.60 (d, *J*=6.5Hz, 3H). <sup>13</sup>C{<sup>1</sup>H} NMR (100 MHz, CDCl<sub>3</sub>) δ 196.6, 142.7, 140.4, 137.5, 131.7, 128.4, 128.2, 122.5, 88.4, 85.6, 74.5, 69.9, 66.1, 25.9, 22.8, 22.0, 21.7, 21.4. HRMS (QTOF) calculated for C<sub>18</sub>H<sub>20</sub>NaO<sub>2</sub> 291.1361, found 291.1347 (M+Na)<sup>+</sup>. IR: 2923 cm<sup>-1</sup>, 2867, 1696, 1629, 1598.

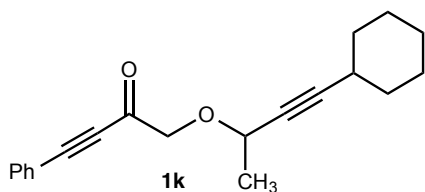

**1k** (spectra pages S49 and S50): Prepared from 4-cyclohexyl-3-butyn-2-ol according to General Procedure B: Purification of the residue by flash chromatography (SiO<sub>2</sub>, 100:1→10:1 hexanes : EtOAc) afforded **1k** (880 mg, 3.0 mmol, 60%) as a yellow oil. **1k**: <sup>1</sup>H NMR (400 MHz, CDCl<sub>3</sub>) δ 7.65 (m, 2H); 7.46 (m, 1H); 7.42-7.38 (m, 2H); 4.48-4.39 (m, 3H); 2.43-2.38 (m, 1H); 1.80 (m, 2H); 1.79-1.79 (m, 2H); 1.52 (d, *J*= 6.5 Hz, 3H); 1.48-1.40 (m, 3H); 1.33-1.27 (m, 3H). <sup>13</sup>C{<sup>1</sup>H} NMR (100 MHz, CDCl<sub>3</sub>) δ 185.5, 133.1, 130.9, 128.6, 119.7, 93.5, 91.2, 85.9, 78.7, 73.9, 66.3, 32.6, 28.9, 25.8, 24.7, 22.4. HRMS (TOF) calculated for C<sub>20</sub>H<sub>22</sub>O<sub>2</sub> 294.1620, found 294.1616 (M)<sup>+</sup>. IR: 2985 cm<sup>-1</sup>, 2929, 2854, 2199, 1686, 1669.

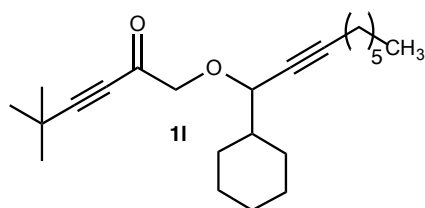

**1l** (spectra pages S51 and S52): Prepared from α-1-octyn-ylcyclohexanemethanol according to General Procedure B: Purification of the residue by flash chromatography (SiO<sub>2</sub>, 100:1→10:1 hexanes : EtOAc) afforded **1l** (860 mg, 2.5 mmol, 50%) as a yellow oil. **1l**: <sup>1</sup>H NMR (400 MHz, CDCl<sub>3</sub>) δ 4.32 (dd, *J*= 17.2 Hz, 1H); 4.26 (d, *J*=17.2 Hz, 1H); 4.02 (m, 1H); 2.24 (td, *J*=6.9, 2.0 Hz, 2H); 1.90-1.88 (m, 2H); 1.77 (m, 2H); 1.68 (m, 2H); 1.53-1.40 (m, 2H); 1.39 (m, 2H); 1.38 (s, 9H); 1.29-1.13 (m, 9 H); 0.86 (t, *J*=6.8 Hz, 3H) <sup>13</sup>C{<sup>1</sup>H} NMR (100 MHz, CDCl<sub>3</sub>) δ 185.9, 104.1, 88.3, 76.7, 75.2, 74.1, 42.7, 31.2, 29.9, 29.0, 28.6, 28.4, 28.2, 27.8, 26.4, 25.9, 25.8, 22.5, 18.6, 13.9. HRMS (TOF) calculated for C<sub>23</sub>H<sub>36</sub>O<sub>2</sub> 344.2715, found 344.2714 (M)<sup>+</sup>. IR: 2926 cm<sup>-1</sup>, 2854, 2213, 1693, 1675.



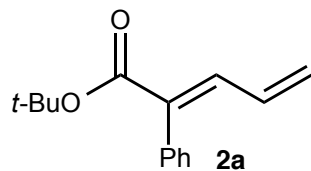

**2a** (spectra pages S53 and S54): Prepared from **1a** according to General Procedure D: Purification of the residue by flash chromatography (SiO<sub>2</sub>, 100:1 → 10:1 hexanes:EtOAc) afforded **2a** (207 mg, 0.9 mmol, 90%) as a yellow oil. **2a**: <sup>1</sup>H NMR (400 MHz, CDCl<sub>3</sub>) δ 7.32 (m, 4H); 7.22 (d, *J*=6.6 Hz, 2H); 6.45 (m, 1H); 5.66

(dd, *J*=1.7, 16.9 Hz, 1H); 5.41 (dd, *J*=1.8, 10.1 Hz, 1H); 1.51 (s, 9H). <sup>13</sup>C{<sup>1</sup>H} NMR (100 MHz, CDCl<sub>3</sub>) δ 166.5, 139.2, 135.3, 135.1, 133.5, 130.2, 127.7, 127.5, 124.7, 80.9, 28.1. HRMS (QTOF) calculated for C<sub>11</sub>H<sub>11</sub>O<sub>2</sub> 175.0759, found 175.0754 (M(-*t*Bu)+2H)<sup>+</sup>. IR: 2981 cm<sup>-1</sup>, 2973, 2937, 2923, 2866, 2844, 1704, 1626, 1598. Reference: Chen, S.; Wang, J. *Chem. Commun.* **2008**, 4198-4200.

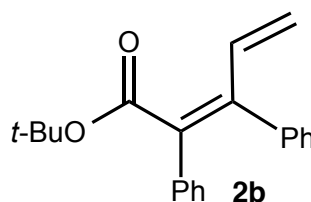

**2b** (spectra pages S55, and S56): Prepared from **1b** according to General Procedure D: Purification of the residue by flash chromatography (SiO<sub>2</sub>, 100:1 → 10:1 hexanes:EtOAc) afforded an inseparable 3:1 ratio of *E*-**2b** and *Z*-**2b** (211 mg, 0.69 mmol, 69%) as a pale yellow oil. *E*-**2b**: <sup>1</sup>H NMR (400 MHz, CDCl<sub>3</sub>) δ 7.48-7.37

(m, 2 H); 7.21 (m, 2H); 7.15 (m, 5H); 7.04 (m, 2H); 5.42 (dd, *J*=1.4, 10.6 Hz, 1H); 5.08 (dd, *J*=1.4, 17.0 Hz, 1H); 1.56 (s, 9H). <sup>13</sup>C{<sup>1</sup>H} NMR (100 MHz, CDCl<sub>3</sub>) δ 168.6, 142.1, 138.6, 137.2, 136.7, 136.3, 136.2, 135.2, 130.5, 129.8, 129.4, 128.2, 127.8, 127.5, 127.4, 127.1, 81.8, 28.1. HRMS (QTOF) calculated for C<sub>21</sub>H<sub>22</sub>NaO<sub>2</sub> 329.1517, found 329.1509 (M+Na)<sup>+</sup>. IR: 2981 cm<sup>-1</sup>, 2973, 2937, 2922, 1713 (br), 1600. Reference: Wang, S.; Shao, P.; Chen, C.; Xi, C. *Org. Lett.* **2015**, *17*, 5112-5115

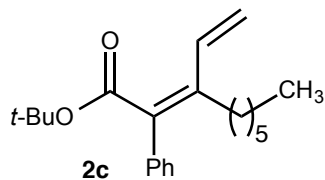

**2c** (spectra pages S57, S58, and S59): Prepared from **1c** according to General Procedure D: Purification of the residue by flash chromatography (SiO<sub>2</sub>, 100:1 → 10:1 hexanes:EtOAc) afforded an inseparable 5:1 ratio of *Z*-**2c** and *E*-**2c** (267 mg, 0.85 mmol, 85%) as a yellow oil. *E*-**2c**: <sup>1</sup>H NMR (400 MHz, CDCl<sub>3</sub>) δ 7.38-7.25

(m, 5H); 6.91 (dd, *J*=11.0, 17.5 Hz, 1H); 5.51 (d, *J*=17.4 Hz, 1H); 5.36 (d, *J*=11.0 Hz, 1H); 2.20 (t, *J*=7.9 Hz, 2H); 1.46 (s, 9H); 1.29-1.16 (m, 8H); 0.86 (t, *J*=6.9 Hz, 3H). <sup>13</sup>C{<sup>1</sup>H} NMR (100 MHz, CDCl<sub>3</sub>) δ 168.3, 141.8, 137.5, 134.9, 134.6, 129.6, 128.7, 128.0, 127.9, 127.2, 117.0, 81.2, 31.3, 29.4, 29.2, 28.6, 28.0, 22.4, 13.9. HRMS (QTOF) calculated for C<sub>17</sub>H<sub>23</sub>O<sub>2</sub> 259.1698, found 259.1688 (M(-*t*-Bu)+2H)<sup>+</sup>. IR: 2966 cm<sup>-1</sup>, 2923, 2864, 2844, 1712 (br), 1601. References: Matsumoto, K.; Shindo, M. *Adv. Synth. Catal.* **2012**, 354, 642-650; Wang, S.; Shao, P.; Chen, C.; Xi, C. *Org. Lett.* **2015**, 17 5112-5115. Li, T.-L.; Wu, Y.L.; Walsgrove, T. C. *Tetrahedron* **1984**, 40, 4701-410.

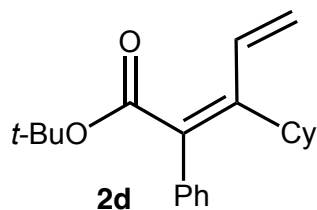

**2d** (spectra pages S60, S61, and S463): Prepared from **1d** according to General Procedure D: Purification of the residue by flash chromatography (SiO<sub>2</sub>, 100:1 → 10:1 hexanes:EtOAc) afforded **2d** (>10:1 *E*:*Z*, 224 mg, 0.72 mmol, 72%) as a yellow oil. **2d**: <sup>1</sup>H NMR (400 MHz, CDCl<sub>3</sub>) δ 7.34 (m, 2H); 7.25 (m, 3H); 6.49 (dd, *J*=11.3, 17.5 Hz, 1H); 5.37 (dd, *J*=2.0, 17.5 Hz, 1H); 5.27 (dd, *J*=2.5, 11.3 Hz, 1H); 2.29 (m, 1H); 1.66 (m, 2H); 1.60 (m, 3H); 1.41-

1.32 (m, 11 H); 1.09 (m, 3H). <sup>13</sup>C{<sup>1</sup>H} NMR (100 MHz, CDCl<sub>3</sub>) δ 169.1, 146.6, 137.2, 134.7, 133.0, 128.9, 128.7, 128.2, 128.1,

127.2, 118.4, 80.7, 40.7, 32.4, 27.9, 26.1, 25.9. HRMS (TOF) calculated for C<sub>21</sub>H<sub>28</sub>O<sub>2</sub> 312.2089, found 312.2088 (M)<sup>+</sup>. IR: 2979 cm<sup>-1</sup>, 2927, 2854, 1714, 1622, 1598.

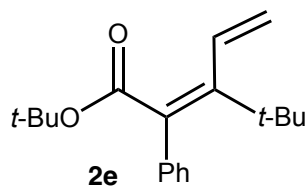

**2e** (spectra pages S63, S64, and S65): Prepared from **1e** according to General Procedure D: Purification of the residue by flash chromatography (SiO<sub>2</sub>, 100:1→10:1 hexanes:EtOAc) afforded **2e** (9:1 *E*:*Z*, 194 mg, 0.68 mmol, 68%) as a yellow oil. **2e**: <sup>1</sup>H NMR (400 MHz, CDCl<sub>3</sub>) δ 7.34 (m, 5H); 6.50 (dd, *J*=10.9, 17.3 Hz, 1H);

5.32 (d, *J*=17.3 Hz, 1H); 5.18 (d, *J*=11.0 Hz, 1H); 1.35 (s, 9H); 0.94 (s, 9H). <sup>13</sup>C{<sup>1</sup>H} NMR (100 MHz, CDCl<sub>3</sub>) δ 169.6, 148.4, 138.2, 137.6, 133.8, 129.6, 129.4, 127.8, 127.7, 127.1, 117.9, 80.5, 36.3, 30.7, 27.8. HRMS (QTOF) calculated for C<sub>19</sub>H<sub>26</sub>NaO<sub>2</sub> 309.1830, found 309.1819 (M+Na)<sup>+</sup>. IR: 2972 cm<sup>-1</sup>, 2869, 1715, 1622, 1598.

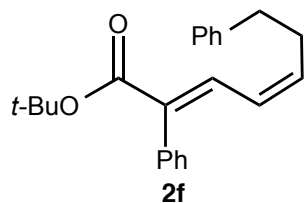

**2f** (spectra pages S66, S67, and S68): Prepared from **1f** according to General Procedure D: Purification of the residue by flash chromatography (SiO<sub>2</sub>, 100:1→10:1 hexanes:EtOAc) afforded **2f** (237 mg, 0.71 mmol, 71%), as an inseparable 4:1 mixture of *E* and *Z* stereoisomers at the α,β-alkene, as a yellow oil. **E-2f**: <sup>1</sup>H NMR (400 MHz, CDCl<sub>3</sub>) δ 7.32 (d, *J*=8.1 Hz, 1H); 7.32-7.22 (m, 5H); 7.20-7.19 (m, 5H); 6.06 (t, *J*=12.0 Hz, 1H); 5.78

(dt, *J*=11.9, 7.5 Hz, 1 H); 2.80 (m, 2H); 2.70 (m, 2H); 1.51 (s, 9H). <sup>13</sup>C{<sup>1</sup>H} NMR (100 MHz, CDCl<sub>3</sub>) δ 166.8, 142.5, 141.2, 139.4,

139.0, 135.4, 134.3, 133.5, 130.2, 128.5, 128.4, 128.3, 127.7, 127.6, 127.3, 127.2, 126.0, 125.9, 125.6, 80.7, 35.6, 30.0, 28.1. HRMS (QTOF) calculated for  $C_{23}H_{26}NaO_2$  357.1830, found 357.1822 ( $M+Na$ )<sup>+</sup>. IR: 2973  $cm^{-1}$ , 2937, 2922, 2865, 2844, 1701, 1627, 1603.

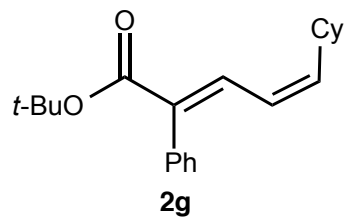

**2g** (spectra pages S69, S70, and S71): Prepared from **1g** according to General Procedure D: Purification of the residue by flash chromatography ( $SiO_2$ , 100:1  $\rightarrow$  10:1 hexanes:EtOAc) afforded **2g** (184 mg, 0.59 mmol, 59%), an inseparable 3:1 mixture of *E* and *Z* stereoisomers at the  $\alpha,\beta$ -alkene, as a yellow oil. **E-2g**: <sup>1</sup>H

NMR (400 MHz,  $CDCl_3$ )  $\delta$  7.75 (d,  $J=7.8$  Hz, 1H); 7.34 (m, 3H); 7.21 (d,  $J=8.3$  Hz, 2H); 5.93 (t,  $J=11.9$  Hz, 1H); 5.59 (t,  $J=10.8$  Hz, 1H); 2.67 (m, 1H); 1.79 (m, 5H); 1.59 (s, 9H); 1.36-1.11 (m, 5H). <sup>13</sup>C{<sup>1</sup>H} NMR (100 MHz,  $CDCl_3$ )  $\delta$  167.0, 146.5, 135.6, 134.2, 133.9, 130.2, 127.6, 127.1, 122.8, 80.7, 37.2, 33.0, 28.2, 28.1, 25.8, 25.6. HRMS (QTOF) calculated for  $C_{21}H_{28}NaO_2$  335.1987, found 335.1975 ( $M+Na$ )<sup>+</sup>. IR: 2924  $cm^{-1}$ , 2851, 1703, 1625, 1598.

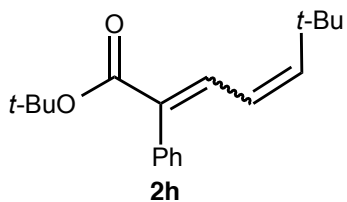

**2h** (spectra pages S72, S73, and S74): Prepared from **1h** according to General Procedure D: Purification of the residue by flash chromatography ( $SiO_2$ , 100:1  $\rightarrow$  10:1 hexanes:EtOAc) afforded **2h** (125 mg, 0.44 mmol, 44%), an inseparable 1.4:1 mixture of *E* and *Z* stereoisomers at the  $\alpha,\beta$ -alkene, as a yellow oil. **2h**:

<sup>1</sup>H NMR (400 MHz,  $CDCl_3$ )  $\delta$  7.99 (d,  $J=12.0$  Hz, 1H); 7.37-7.31 (m, 8H); 7.23 (d,  $J=8.3$  Hz, 2H); 7.15 (d,  $J=12.3$  Hz, 1H); 6.38 (t,  $J=12.1$  Hz, 1H); 5.87 (t,  $J=12.2$  Hz, 1H); 5.71 (d,  $J=12.1$  Hz, 1H); 5.70 (d,  $J=12.3$  Hz, 1H); 1.58 (s, 9H); 1.51 (s, 9H); 1.27 (s, 9H); 1.25

(s, 9H).  $^{13}\text{C}\{^1\text{H}\}$  NMR (100 MHz,  $\text{CDCl}_3$ )  $\delta$  167.7, 166.7, 149.8, 147.0, 137.6, 135.7, 135.0, 134.6, 133.9, 130.3, 130.2, 128.3, 128.0, 127.6, 127.6, 127.2, 126.6, 122.9, 122.8, 81.8, 80.6, 34.6, 31.6, 31.4, 29.1, 28.2, 28.1. HRMS (QTOF) calculated for  $\text{C}_{15}\text{H}_{19}\text{O}_2$  231.1385, found 231.1380 ( $\text{M}(-t\text{-Bu})+2\text{H}$ ) $^+$ . IR: 2981  $\text{cm}^{-1}$ , 2966, 2922, 2866, 2844, 2826, 1704, 1628, 1598.

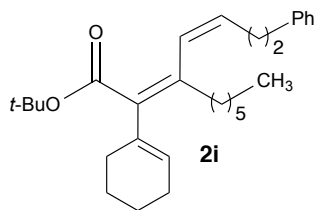

**2i** (spectra pages S75, S76, and S77): Prepared from **1i** according to General Procedure D: Purification of the residue by flash chromatography ( $\text{SiO}_2$ , 100:1  $\rightarrow$  10:1 hexanes:EtOAc) afforded **2i** (300 mg, 0.71 mmol, 71%), as an inseparable 1:3 mixture of *E* and *Z* stereoisomers at the  $\gamma,\delta$ -alkene, as a yellow oil. **2i** (major isomer):

$^1\text{H}$  NMR (400 MHz,  $\text{CDCl}_3$ )  $\delta$  7.30-7.18 (m, 5H); 6.07 (d,  $J=11.5$  Hz, 1H); 5.58 (m, 1H); 5.56 (dt,  $J=1.9, 11.5$  Hz, 1H); 2.68 (t,  $J=7.4$  Hz, 2H); 2.37 (m, 2H); 2.12-2.05 (m, 7H); 1.69-1.58 (m, 4H); 1.44 (s, 9H); 1.28-1.24 (m, 7H); 0.91 (t,  $J=6.7$  Hz, 3H).  $^{13}\text{C}\{^1\text{H}\}$  NMR (100 MHz,  $\text{CDCl}_3$ )  $\delta$  168.3, 142.6, 142.0, 135.8, 134.8, 132.8, 130.3, 129.8, 128.4, 128.3, 128.2, 126.7, 125.7, 79.9, 35.8, 34.1, 31.5, 30.6, 29.7, 29.4, 28.9, 28.3, 28.1, 28.0, 25.3, 22.9, 22.5, 22.0, 14.0. HRMS (TOF) calculated for  $\text{C}_{29}\text{H}_{42}\text{O}_2$  422.3185, found 422.3186 ( $\text{M}$ ) $^+$ . IR: 2981  $\text{cm}^{-1}$ , 2973, 2966, 2937, 2923, 2864, 2844, 2829, 1712 (br), 1603.

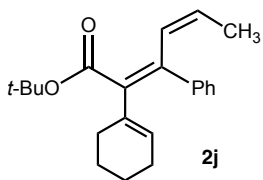

**2j** (spectra pages S78, S79, and S80): Prepared from **1j** according to General Procedure D: Purification of the residue by flash chromatography ( $\text{SiO}_2$ , 100:1  $\rightarrow$  10:1 hexanes:Et<sub>2</sub>O) afforded **2j** (155 mg, 0.48 mmol, 48%), as an inseparable 3:1 mixture of *E* and *Z* stereoisomers at the  $\alpha,\beta$ -alkene, as a yellow oil. **2j**:  $^1\text{H}$  NMR (400 MHz,

CDCl<sub>3</sub>) δ 7.29 – 7.21 (m, 5H); 6.28-6.25 (d, *J*=11.6 Hz, 1H); 5.72-5.68 (dd, *J*=11.4, 7.1 Hz, 1H); 5.52-5.50 (m, 1H); 1.93 (m, 4H); 1.51 (s, 9H); 1.43 (d, *J*=7.1 Hz, 3H); 1.41-1.28 (m, 4H). <sup>13</sup>C{<sup>1</sup>H} NMR (100 MHz, CDCl<sub>3</sub>) δ 169.0, 140.5, 137.5, 134.6, 130.0, 129.2, 128.9, 128.3, 128.1, 127.9, 127.6, 80.5, 54.7, 29.6, 28.5, 28.0, 27.7, 27.3, 25.6, 22.8, 21.7, 14.8. HRMS (TOF) calculated for C<sub>22</sub>H<sub>28</sub>O<sub>2</sub> 324.2089, found 324.2100 (M)<sup>+</sup>. IR: 2981 cm<sup>-1</sup>, 2973, 2937, 2923, 2865, 2844, 2828, 1711 (br), 1598.

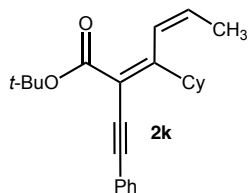

**2k** (spectra pages S81 and S82): Prepared from **1k** according to General Procedure D: Purification of the residue by flash chromatography (SiO<sub>2</sub>, 100:1 → 10:1 hexanes:Et<sub>2</sub>O) afforded **2k** (192 mg, 0.55 mmol, 55%, as a >10:1 mixture of *Z* and *E* stereoisomers at the α,β-alkene), as a yellow oil. **2k** (major isomer): <sup>1</sup>H NMR (400 MHz, CDCl<sub>3</sub>) δ 7.47 (m, 2H); 7.36-7.32 (m, 3H); 6.01 (dd, *J*=11.7, 1.7 Hz, 1H); 5.69 (dq, *J*=4.8, 11.7 Hz, 1H); 3.08 (m, 1H); 1.87-1.70 (m, 4H); 1.69 (dd, *J*=1.9, 6.7 Hz, 3H); 1.51 (s, 9H); 1.35-1.28 (m, 6H). <sup>13</sup>C{<sup>1</sup>H} NMR (100 MHz, CDCl<sub>3</sub>) δ 165.1, 159.4, 131.3, 128.2, 128.0, 127.6, 126.5, 123.6, 115.0, 94.8, 85.5, 80.9, 45.4, 30.3, 27.9, 26.3, 25.9, 14.7. HRMS (TOF) calculated for C<sub>24</sub>H<sub>30</sub>O<sub>2</sub> 350.2246, found 350.2251 (M)<sup>+</sup>. IR: 2981 cm<sup>-1</sup>, 2973, 2937, 2844, 2865, 2827, 2205, 1721 (br).

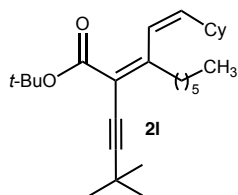

**2l** (spectra pages S83, S84, and S85): Prepared from **1l** according to General Procedure D: Purification of the residue by flash chromatography (SiO<sub>2</sub>, 100:1 → 10:1 hexanes:Et<sub>2</sub>O) afforded **2l** (298 mg, 0.75 mmol, 75%, as a >10:1 mixture of *Z* and *E* stereoisomers at the α,β-alkene) as a light yellow oil. **2l** (major isomer): <sup>1</sup>H NMR (400 MHz,

CDCl<sub>3</sub>) δ 6.19 (d, *J*=11.8 Hz, 1H); 5.32 (t, *J*=11.8, 1H); 2.53 (t, *J*=7.7 Hz, 2H); 2.25-2.10 (m, 2H); 1.72-1.60 (m, 7H); 1.49 (s, 9H); 1.30 (s, 9H); 1.30-1.24 (m, 4H); 1.23 (m, 4H); 1.11 (m, 2H); 0.95 (t, *J*=6.8 Hz, 3H). <sup>13</sup>C{<sup>1</sup>H} NMR (100 MHz, CDCl<sub>3</sub>) δ 164.8, 156.9, 137.8, 126.2, 115.4, 104.0, 80.7, 75.6, 38.1, 37.5, 32.5, 31.6, 30.9, 29.5, 28.2, 28.0, 27.9, 25.9, 25.6, 22.5, 14.0. HRMS (QTOF) calculated for C<sub>23</sub>H<sub>37</sub>O<sub>2</sub> 345.2794, found 345.2799 (M(-*t*Bu)+2H)<sup>+</sup>. IR: 2967 cm<sup>-1</sup>, 2923, 2863, 2844, 2219, 1716, 1675.

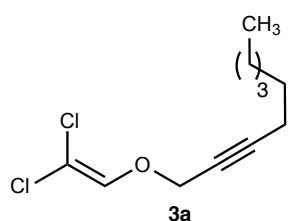

**3a** (spectra pages S86 and S87): Prepared according to General Procedure C from 2-nonyne-1-ol: Purification of the residue by flash chromatography (SiO<sub>2</sub>, 100:1→20:1 hexanes:EtOAc) afforded **3a** (1.5 g, 6.4 mmol, 64%). **3a**: <sup>1</sup>H NMR (400 MHz, CDCl<sub>3</sub>) δ 6.74 (s, 1H); 4.50 (s, 1H); 2.27 (m, 2H); 1.58 (m, 2H); 1.45-1.27 (m, 7H); 0.93 (t, *J*= 6.7 Hz, 3H). <sup>13</sup>C{<sup>1</sup>H} NMR (100 MHz, CDCl<sub>3</sub>) δ 141.5, 105.4, 90.1, 73.6, 60.7, 31.2, 28.4, 28.2, 22.5, 18.7, 14.0. IR: 2930 cm<sup>-1</sup>, 2861, 2229, 1650.

Note: Dichlorovinyl ethers such as **3a-3i** give unsatisfactory results on exact mass analysis due to degradation processes occurring in the mass spectrometer. A possible mechanism may involve thermal rearrangement of the propargyl dichlorovinyl ether and subsequent decomposition of the resultant aldehyde. Even using the soft ionization technique of QTOF (or ESI)-MS did not provide the expected molecular ion. See Supporting Information in reference 3 (main text) and: Morimoto, T.; Sekiya, M. *Synthesis* **1981**, 308–310.

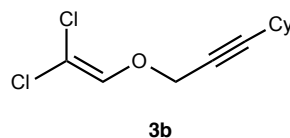

**3b** (spectra pages S88 and S89): Prepared according to General Procedure C from 3-cyclohexyl-2-propyn-1-ol: Purification of the residue by flash chromatography (SiO<sub>2</sub>, 100:1→20:1 hexanes:EtOAc) afforded **3b** (1.18 g,

5.1 mmol, 51%). **3b**:  $^1\text{H}$  NMR (400 MHz,  $\text{CDCl}_3$ )  $\delta$  6.75 (s, 1H); 4.51 (d,  $J=2.0$  Hz, 2H); 2.44 (m, 1H); 1.82-1.79 (m, 2H); 1.74-1.67 (m, 2H); 1.54-1.42 (m, 3H); 1.35-1.29 (m, 3H).  $^{13}\text{C}\{^1\text{H}\}$  NMR (100 MHz,  $\text{CDCl}_3$ )  $\delta$  141.5, 105.5, 94.1, 73.6, 60.8, 32.3, 29.0, 25.8, 24.7. IR: 2929  $\text{cm}^{-1}$ , 2855, 2231, 1650.

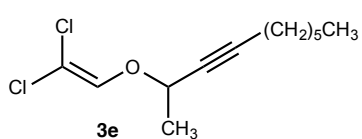

**3e** (spectra pages S90 and S91): Prepared according to General Procedure C from 3-decyne-2-ol: Purification of the residue by flash chromatography ( $\text{SiO}_2$ , 100:1 $\rightarrow$ 20:1 hexanes:EtOAc) afforded **3e**

(2.25 g, 9.1 mmol, 91%). **3e**:  $^1\text{H}$  NMR (400 MHz,  $\text{CDCl}_3$ )  $\delta$  6.82 (s, 1H); 4.64 (m, 1H); 2.26 (td,  $J=1.9, 6.9$  Hz, 2H); 1.53 (m, 1H); 1.51 (d,  $J=6.6$  Hz, 3H); 1.45-1.27 (m, 7H); 0.93 (t,  $J=6.7$  Hz, 3H).  $^{13}\text{C}\{^1\text{H}\}$  NMR (100 MHz,  $\text{CDCl}_3$ )  $\delta$  140.6, 104.9, 88.5, 68.6, 31.2, 28.4, 28.3, 22.5, 22.2, 18.6, 13.9. IR: 2980  $\text{cm}^{-1}$ , 2972, 2938, 2922, 2866, 2844, 2825, 2240, 1651.

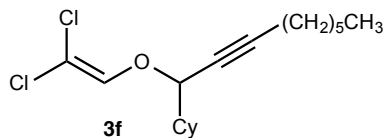

**3f** (spectra pages S92 and S93): Prepared according to General Procedure C from  $\alpha$ -1-octynylcyclohexanemethanol: Purification of the residue by flash chromatography ( $\text{SiO}_2$ , 100:1 $\rightarrow$ 40:1

hexanes:EtOAc) afforded **3f** (2.55 g, 8.1 mmol, 81%). **3f**:  $^1\text{H}$  NMR (400 MHz,  $\text{CDCl}_3$ )  $\delta$  6.83 (s, 1H); 4.27 (dt,  $J=2.0, 6.6$  Hz, 1H); 2.26 (t,  $J=7.0$  Hz, 2H); 1.89 (m, 2H); 1.77 (m, 2H); 1.67 (m, 2H); 1.54-1.50 (m, 3H); 1.45 (m, 2H); 1.40-1.10 (m, 8H); 0.93 (t,  $J=6.8$  Hz, 3H).  $^{13}\text{C}\{^1\text{H}\}$  NMR (100 MHz,  $\text{CDCl}_3$ )  $\delta$  141.1, 104.5, 89.9, 77.6, 75.9, 42.7, 37.1, 31.9, 31.2, 29.7, 28.6, 28.4, 26.2, 25.7, 22.6, 18.7, 14.0. IR: 2926  $\text{cm}^{-1}$ , 2855, 2230, 1640.



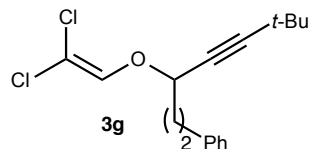

**3g** (spectra pages S94 and S95): Prepared according to General Procedure C from  $\alpha$ -1-(3,3-dimethyl)butynylhydrocinnamylmethanol: Purification of the residue by flash chromatography (SiO<sub>2</sub>, 100:1→40:1 hexanes:EtOAc) afforded **3g** (1.83 g, 5.9 mmol, 59%). **3g**: <sup>1</sup>H NMR (400 MHz, CDCl<sub>3</sub>)  $\delta$  7.35 (m, 2H); 7.24

(m, 3H); 6.82 (s, 1H); 4.48 (t,  $J$ =6.3 Hz, 1H); 2.87 (t,  $J$ =9.4 Hz, 2H); 2.22-2.04 (m, 2H); 1.29 (s, 9H). <sup>13</sup>C{<sup>1</sup>H} NMR (100 MHz, CDCl<sub>3</sub>)  $\delta$  140.7, 140.5, 128.6, 128.5, 126.1, 105.4, 97.9, 75.1, 71.7, 37.4, 31.2, 30.8, 27.5, 14.0. IR: 2969 cm<sup>-1</sup>, 2866, 2844, 2239, 1640.

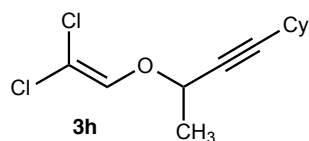

**3h** (spectra pages S96 and S97): Prepared according to General Procedure C from 4-cyclohexyl-3-butyn-2-ol: Purification of the residue by flash chromatography (SiO<sub>2</sub>, 100:1→40:1 hexanes:EtOAc) afforded **3h** (1.94 g, 7.9 mmol, 79%). **3h**: <sup>1</sup>H NMR (400 MHz, CDCl<sub>3</sub>)  $\delta$  6.83 (s, 1H); 4.67 (qd,  $J$ =1.8, 6.6 Hz, 1H); 2.45

(m, 1H); 1.82-1.68 (m, 4H); 1.51 (d,  $J$ =5.9 Hz, 3H); 1.50-1.42 (m, 3H); 1.37-1.31 (m, 3H). <sup>13</sup>C{<sup>1</sup>H} NMR (100 MHz, CDCl<sub>3</sub>)  $\delta$  140.6, 105.0, 92.5, 77.7, 68.7, 32.3, 28.8, 25.8, 24.6, 22.4. IR: 2981 cm<sup>-1</sup>, 2966, 2930, 2856, 2237, 1640.

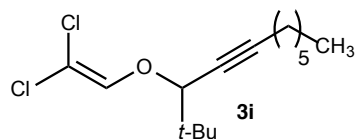

**3i** (spectra pages S98 and S99): Prepared according to General Procedure C from 2,2-dimethyl-4-undecyn-3-ol: Purification of the residue by flash chromatography (SiO<sub>2</sub>, 100:1→40:1 hexanes:EtOAc) afforded **3i**

(2.49 g, 8.6 mmol, 86%). **3i**: <sup>1</sup>H NMR (400 MHz, CDCl<sub>3</sub>)  $\delta$  6.84 (s, 1H); 4.10 (t,  $J$ =2.0 Hz, 1H); 2.27 (dt,  $J$ =6.9, 2.0 Hz, 2H); 1.58-1.51 (m, 2H); 1.46-1.39 (m, 2H); 1.35-1.29 (m, 4H); 1.04 (s, 9H); 0.92 (t,  $J$ =6.7 Hz, 3H). <sup>13</sup>C{<sup>1</sup>H} NMR (100 MHz, CDCl<sub>3</sub>)

$\delta$  141.6, 104.6, 89.8, 81.5, 75.6, 35.8, 31.3, 28.5, 25.5, 22.5, 18.6, 13.9. IR: 2980  $\text{cm}^{-1}$ , 2966, 2957, 2936, 2923, 2865, 2844, 2827, 2230, 1640.

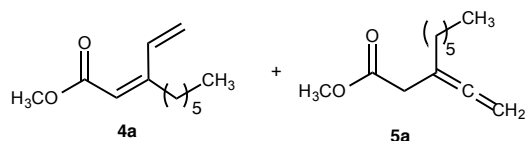

**4a** (spectra pages S100, S101, and S102): Prepared according to General Procedure E from

**3a**: Purification of the residue by flash chromatography ( $\text{SiO}_2$ , 100:1  $\rightarrow$  20:1 hexanes:EtOAc)

afforded **4a** (117 mg, 0.60 mmol, 60%, as an inseparable 5:1 **4a**:**5a** mixture). **4a**:  $^1\text{H}$  NMR (400 MHz,  $\text{CDCl}_3$ )  $\delta$  7.74 (dd,  $J=6.7$ , 16.9 Hz, 1H); 5.72 (s, 1H); 5.65 (d,  $J=17.7$  Hz, 1H); 5.47 (dt,  $J=1.4$ , 11.1 Hz, 1H); 3.72 (s, 3H); 2.37 (t,  $J=7.5$  Hz, 2H); 1.54 (m, 2H); 1.31 (m, 6H); 0.92 (t,  $J=6.7$  Hz, 3H).  $^{13}\text{C}\{^1\text{H}\}$  NMR (100 MHz,  $\text{CDCl}_3$ )  $\delta$  166.7, 155.3, 133.1, 120.0, 116.6, 51.0, 33.5, 31.6, 29.2, 29.0, 14.0. HRMS (QTOF) calculated for  $\text{C}_{12}\text{H}_{21}\text{O}_2$  197.1542, found 197.1541 ( $\text{M}+\text{H}$ ) $^+$ . IR: 2936  $\text{cm}^{-1}$ , 2863, 2844, 1708, 1633. Reference: Kazuhiro, Y.; Hidetoshi, T.; Imamoto, T. *Chem. Eur. J.* **2008**, *14*, 8246-8261.; Xu, Y.-H.; Lu, J.; Loh, T.-P. *J. Am. Chem. Soc.* **2009**, *131*, 1372-1373.

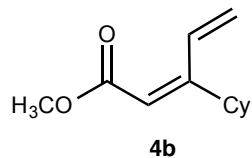

**4b** (spectra pages S103 and S104): Prepared according to General Procedure E from **3b**: Purification of the residue

by flash chromatography ( $\text{SiO}_2$ , 100:1  $\rightarrow$  20:1 hexanes:EtOAc) afforded **4b** (as an inseparable 5:1 mixture of *E*:*Z*

stereoisomers, 132 mg, 0.68 mmol, 68%). **E-4b**:  $^1\text{H}$  NMR (400 MHz,  $\text{CDCl}_3$ )  $\delta$  7.68 (dd,  $J=17.8$ , 6.6 Hz, 1H);

5.70 (s, 1H); 5.65-5.60 (d,  $J=17.8$  Hz, 1H); 5.43 (d,  $J=11.2$  Hz, 1H); 3.72 (s, 3H); 2.51 (t,  $J=11.7$  Hz, 1H); 1.84-1.60 (m, 5H); 1.38-1.20

(m, 5H).  $^{13}\text{C}\{^1\text{H}\}$  NMR (100 MHz,  $\text{CDCl}_3$ )  $\delta$  167.2, 160.3, 133.2, 118.6, 114.5, 51.1, 40.2, 33.2, 26.7, 26.2. HRMS (TOF) calculated for  $\text{C}_{12}\text{H}_{18}\text{O}_2$  194.1307, found 194.1308 ( $\text{M}^+$ ). IR: 2981  $\text{cm}^{-1}$ , 2973, 2936, 2923, 1715, 1629.

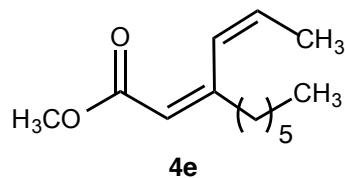

**4e** (spectra pages S105, S106, and S107): Prepared according to General Procedure E from **3e**: Purification of the residue by flash chromatography ( $\text{SiO}_2$ , 100:1  $\rightarrow$  20:1 hexanes:EtOAc) afforded **4e** (100 mg, 0.48 mmol, 48%, as a >10:1 *Z:E* mixture of stereoisomers at the  $\alpha,\beta$ -alkene). **4e**:  $^1\text{H}$  NMR (400 MHz,  $\text{CDCl}_3$ )

$\delta$  6.35 (d,  $J=11.9$  Hz, 1H); 5.75-5.70 (m, 2H); 3.68 (s, 3H); 2.30 (t,  $J=7.5$  Hz, 2H); 1.68 (d,  $J=7.0$  Hz, 3H); 1.49 (m, 2H); 1.39-1.27 (m, 6H); 0.91 (t,  $J=6.7$  Hz, 3H).  $^{13}\text{C}\{^1\text{H}\}$  NMR (100 MHz,  $\text{CDCl}_3$ )  $\delta$  166.6, 157.2, 128.3, 127.8, 116.8, 50.9, 38.6, 31.6, 28.9, 28.0, 22.5, 15.0, 14.0. HRMS (QTOF) calculated for  $\text{C}_{13}\text{H}_{23}\text{O}_2$  211.1698, found 211.1699 ( $\text{M}+\text{H}^+$ ). IR: 2925  $\text{cm}^{-1}$ , 2859, 1718, 1634, 1613.

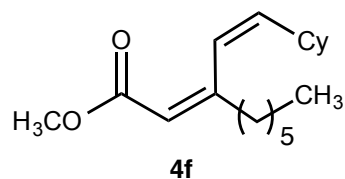

**4f** (spectra pages S108 and S109): Prepared according to General Procedure E from **3f**: Purification of the residue by flash chromatography ( $\text{SiO}_2$ , 100:1  $\rightarrow$  20:1 hexanes:Et<sub>2</sub>O) afforded **4f** (144 mg, 0.52 mmol, 52% as a >10:1 *Z:E* mixture of stereoisomers at the  $\alpha,\beta$ -alkene). **4f**:  $^1\text{H}$  NMR (400 MHz,  $\text{CDCl}_3$ )  $\delta$  6.25 (d,  $J=12.0$

Hz, 1H); 5.712 (s, 1H); 5.41 (t,  $J=10.8$  Hz, 1H); 3.68 (s, 3H); 2.27 (t,  $J=7.2$  Hz, 2H); 2.12 (m, 1H); 1.73-1.60 (m, 8H); 1.50-1.47 (m, 2H); 1.26-1.07 (m, 8H); 0.90 (t,  $J=6.5$  Hz, 3H).  $^{13}\text{C}\{^1\text{H}\}$  NMR (100 MHz,  $\text{CDCl}_3$ ) 166.6, 157.8, 138.8, 125.0, 116.6, 50.8, 39.2, 38.3,

32.9, 31.6, 29.0, 28.1, 25.9, 25.7, 22.5, 14.0. HRMS (QTOF) calculated for  $C_{18}H_{31}O_2$  279.2324, found 279.2325 ( $M+H$ )<sup>+</sup>. IR: 2923  $cm^{-1}$ , 2858, 1721, 1631.

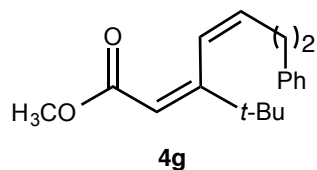

**4g** (spectra pages S110, S111 and S112): Prepared according to General Procedure E from **3g**: Purification of the residue by flash chromatography ( $SiO_2$ , 100:1  $\rightarrow$  20:1 hexanes:Et<sub>2</sub>O) afforded **4g** (193 mg, 0.71 mmol, 71%) as an inseparable 1:2.3 mixture of *E* and *Z* stereoisomers at the  $\gamma,\delta$ -alkene. **Z-4g**: <sup>1</sup>H NMR (400 MHz, CDCl<sub>3</sub>)  $\delta$  7.35 (m, 2H); 7.22-7.17 (m, 3H); 6.08 (dt,  $J=1.4, 11.8$  Hz, 1H); 5.86 (s, 1H); 5.75-5.69 (m, 1H); 3.69 (s, 3H); 2.67 (t,  $J=8.3$

Hz, 2H); 2.27 (q,  $J=8.2$  Hz, 2H); 1.10 (s, 9H). <sup>13</sup>C{<sup>1</sup>H} NMR (100 MHz, CDCl<sub>3</sub>) 167.2, 163.0, 141.9, 134.9, 132.5, 128.4, 128.3, 126.2, 125.8, 125.2, 114.8, 51.0, 37.5, 35.3, 31.0, 29.7, 29.1.

HRMS (QTOF) calculated for  $C_{18}H_{25}O_2$  273.1855, found 273.1858 ( $M+H$ )<sup>+</sup>. IR: 2966  $cm^{-1}$ , 2951, 2923, 2867, 2844, 1730, 1625, 1605.

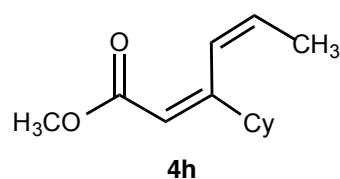

**4h** (spectra pages S113, S114, and S115): Prepared according to General Procedure E from **3h**: Purification of the residue by flash chromatography ( $SiO_2$ , 100:1  $\rightarrow$  20:1 hexanes:Et<sub>2</sub>O) afforded **4h** (137 mg, 0.66 mmol, 66% as a >10:1 *Z:E* mixture of stereoisomers at the  $\alpha,\beta$ -alkene). **4h**: <sup>1</sup>H NMR (400 MHz, CDCl<sub>3</sub>)  $\delta$  6.14 (d,  $J=11.8$  Hz, 1H); 5.76 (s, 1H); 5.75-5.70 (m, 1H); 3.67 (s, 3H); 2.12 (t,  $J=8.9$  Hz, 1H); 1.81-1.60 (m, 5H); 1.58 (d,  $J=6.9$  Hz, 3H); 1.30-

1.30-

1.15 (m, 5H).  $^{13}\text{C}\{^1\text{H}\}$  NMR (100 MHz,  $\text{CDCl}_3$ ) 166.9, 161.3, 127.8, 127.5, 115.1, 51.0, 46.7, 31.7, 26.5, 26.0, 14.7. HRMS (TOF) calculated for  $\text{C}_{13}\text{H}_{20}\text{O}_2$  208.1463, found 208.1462 ( $\text{M}^+$ ). IR: 2923  $\text{cm}^{-1}$ , 2863, 1731, 1630.

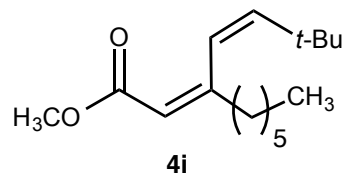

**4i** (spectra pages S116, S117, and S118): Prepared according to General Procedure E from **3i**: Purification of the residue by flash chromatography ( $\text{SiO}_2$ , 100:1  $\rightarrow$  20:1 hexanes: $\text{Et}_2\text{O}$ ) afforded **4i** (224 mg, 0.89 mmol, 89% as a separable 5:1 *Z:E* mixture of stereoisomers at the  $\alpha,\beta$ -alkene). **Z-4i**:  $^1\text{H}$  NMR (400 MHz,  $\text{CDCl}_3$ )

$\delta$  5.92 (dd,  $J=13.2, 1.9$  Hz, 1H); 5.68 (s, 1H); 5.39 (d,  $J=13.2$  Hz, 1H); 3.68 (s, 3H); 2.29 (t,  $J=7.5$  Hz, 2H); 1.52-1.48 (m, 2H); 1.31 (m, 6H); 1.04 (s, 9H); 0.91 (t,  $J=6.5$  Hz, 3H).  $^{13}\text{C}\{^1\text{H}\}$  NMR (100 MHz,  $\text{CDCl}_3$ ) 166.5, 159.4, 139.6, 124.5, 116.2, 50.8, 40.8, 34.5, 31.6, 30.2, 29.0, 27.6, 22.5, 14.0. HRMS (QTOF) calculated for  $\text{C}_{16}\text{H}_{29}\text{O}_2$  253.2168, found 253.2152 ( $\text{M}+\text{H}^+$ ). IR: 2950  $\text{cm}^{-1}$ , 2864, 2844, 1729, 1622.

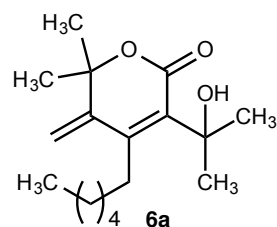

**6a** (spectra pages S119, S120, and S121): Prepared according to General Procedure F from **3a**: Purification of the residue by flash chromatography ( $\text{SiO}_2$ , 20:1  $\rightarrow$  4:1 hexanes: $\text{EtOAc}$ ) afforded **6a** (229 mg, 0.82 mmol, 82%). **6a**:  $^1\text{H}$  NMR (400 MHz,  $\text{CDCl}_3$ )  $\delta$  5.46 (d,  $J=5.0$  Hz, 2H); 4.71 (s, 1H); 4.23, 2.20 (m, 1H); 2.46-2.52 (m, 2H); 1.60 (s, 6H); 1.57 (s, 6H); 1.50-1.43 (m, 4H); 1.39-1.27 (m, 3H); 0.90 (t,  $J=4.6$  Hz, 3H).  $^{13}\text{C}\{^1\text{H}\}$  NMR (100

MHz, CDCl<sub>3</sub>) 165.6, 146.5, 145.5, 134.4, 114.1, 80.4, 72.2, 31.4, 31.3, 30.3, 30.0, 29.8, 28.5, 27.0, 22.5, 18.7, 14.0. HRMS (TOF) calculated for C<sub>17</sub>H<sub>28</sub>O<sub>3</sub> 280.2038, found 280.2042 (M)<sup>+</sup>. IR: 3455 cm<sup>-1</sup>, 2936, 2864, 2844, 1682 (br).

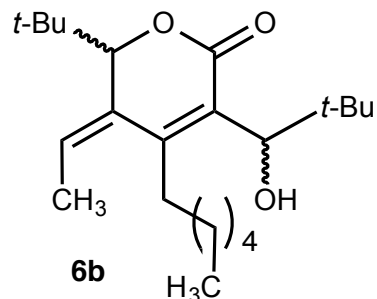

**6b (1:1 syn:anti)** (spectra pages S122-S127): Prepared according to General Procedure F from **3e**: Purification of the residue by flash chromatography (SiO<sub>2</sub>, 20:1→4:1 hexanes:EtOAc) afforded **6b** (213 mg, 0.61 mmol, 61%, as a separable 1:1 mixture of *syn:anti* diastereomers). **6b (syn)**: <sup>1</sup>H NMR (400 MHz, CDCl<sub>3</sub>) δ 5.66 (m, 2H); 4.44 (m, 2H); 2.67 (m, 2H); 1.89 (d, *J*=7.3 Hz, 3H); 1.42 (m, 3H); 1.33-1.29 (m, 5H); 0.99 (s, 9H); 0.98 (s, 9H); 0.93 (t, *J*=7.1 Hz, 3H). <sup>13</sup>C{<sup>1</sup>H} NMR (100 MHz, CDCl<sub>3</sub>)

166.2, 152.8, 133.2, 128.6, 125.9, 92.2, 37.8, 36.3, 31.4, 31.2, 30.0, 27.2, 26.9, 26.8, 22.6, 15.5, 13.9. HRMS (QTOF) calculated for C<sub>22</sub>H<sub>38</sub>NaO<sub>3</sub> 373.2719, found 373.2714 (M+Na)<sup>+</sup>. IR: 3440 cm<sup>-1</sup>, 2955, 2934, 2869, 1674 (br), 1629. **6b (anti)**: <sup>1</sup>H NMR (400 MHz, CDCl<sub>3</sub>) δ 5.72 (q, *J*=7.4 Hz, 1H); 4.44 - 4.39 (m, 3H); 2.69 (m, 1H); 2.50 (m, 1H); 1.89 (d, *J*=7.4 Hz, 3H); 1.42-1.40 (m, 3H); 1.38-1.29 (m, 5H); 0.97 (s, 9H); 0.95 (s, 9H); 0.90 (t, *J*= 7.0 Hz, 3H). <sup>13</sup>C{<sup>1</sup>H} NMR (100 MHz, CDCl<sub>3</sub>) 164.7, 151.8, 132.0, 129.1, 127.2, 92.7, 76.5, 38.2, 36.6, 32.4, 31.5, 30.0, 28.3, 27.4, 27.3, 26.5, 26.4, 26.3, 22.5, 15.5, 13.9. HRMS (QTOF) calculated for C<sub>22</sub>H<sub>39</sub>O<sub>3</sub> 351.2899, found 351.2897 (M+H)<sup>+</sup>. IR: 3446 cm<sup>-1</sup>, 2981, 2966, 2952, 2937, 2922, 2866, 2844, 2826, 1738, 1681, 1635.

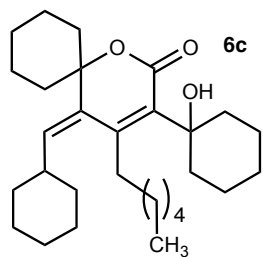

**6c** (spectra pages S128, S129, and S130): Prepared according to General Procedure G from **3c**: Purification of the residue by flash chromatography (SiO<sub>2</sub>, 20:1 → 4:1 hexanes:EtOAc) afforded **6c** (260 mg, 0.59 mmol, 59%). **6c**:

<sup>1</sup>H NMR (400 MHz, CDCl<sub>3</sub>) δ 5.51 (d, *J*=10.2 Hz, 1H); 4.53 (s, 1H); 3.76 (m, 1H); 2.66 (m, 2H); 2.09 (m, 2H); 1.92 (m, 4H); 1.88-1.56 (m, 18H); 1.46-1.31 (m, 12H); 1.20 (m, 2H); 0.93 (t, *J*=6.7 Hz, 3H). <sup>13</sup>C{<sup>1</sup>H} NMR (100

MHz, CDCl<sub>3</sub>) 166.8, 147.1, 136.0, 135.8, 134.4, 82.3, 73.8, 38.4, 36.9, 34.1, 33.1, 32.9, 31.4, 29.8, 28.8, 25.8, 25.6, 25.5, 25.4, 22.5, 22.0, 21.6, 14.0. HRMS (QTOF) calculated for C<sub>29</sub>H<sub>46</sub>NaO<sub>3</sub> 465.3345, found 465.3348 (M+Na)<sup>+</sup>. IR: 3480 cm<sup>-1</sup>, 2981, 2966, 2923, 2845, 2860, 1683, 1636.

<sup>1</sup>H NMR and <sup>13</sup>C NMR spectra for compounds **1a**, **1b**, **1c**, **1d**, **1e**, **1f**, **1g**, **1h**, **1i**, **1j**, **1k**, **1l**, **2a**, **2b**, **2c**, **2d**, **2e**, **2f**, **2g**, **2h**, **2i**, **2j**, **2k**, **2l**, **3a**, **3b**, **3e**, **3f**, **3g**, **3h**, **3i**, **4a**, **4b**, **4e**, **4f**, **4g**, **4h**, **4i**, **6a**, **6b(syn)**, **6b(anti)**, **6c**:  
pp. S22-S83

$^1\text{H}$  NMR (400 MHz),  $\text{CDCl}_3$ , as an inseparable 4:1 mixture with diazoacetophenone

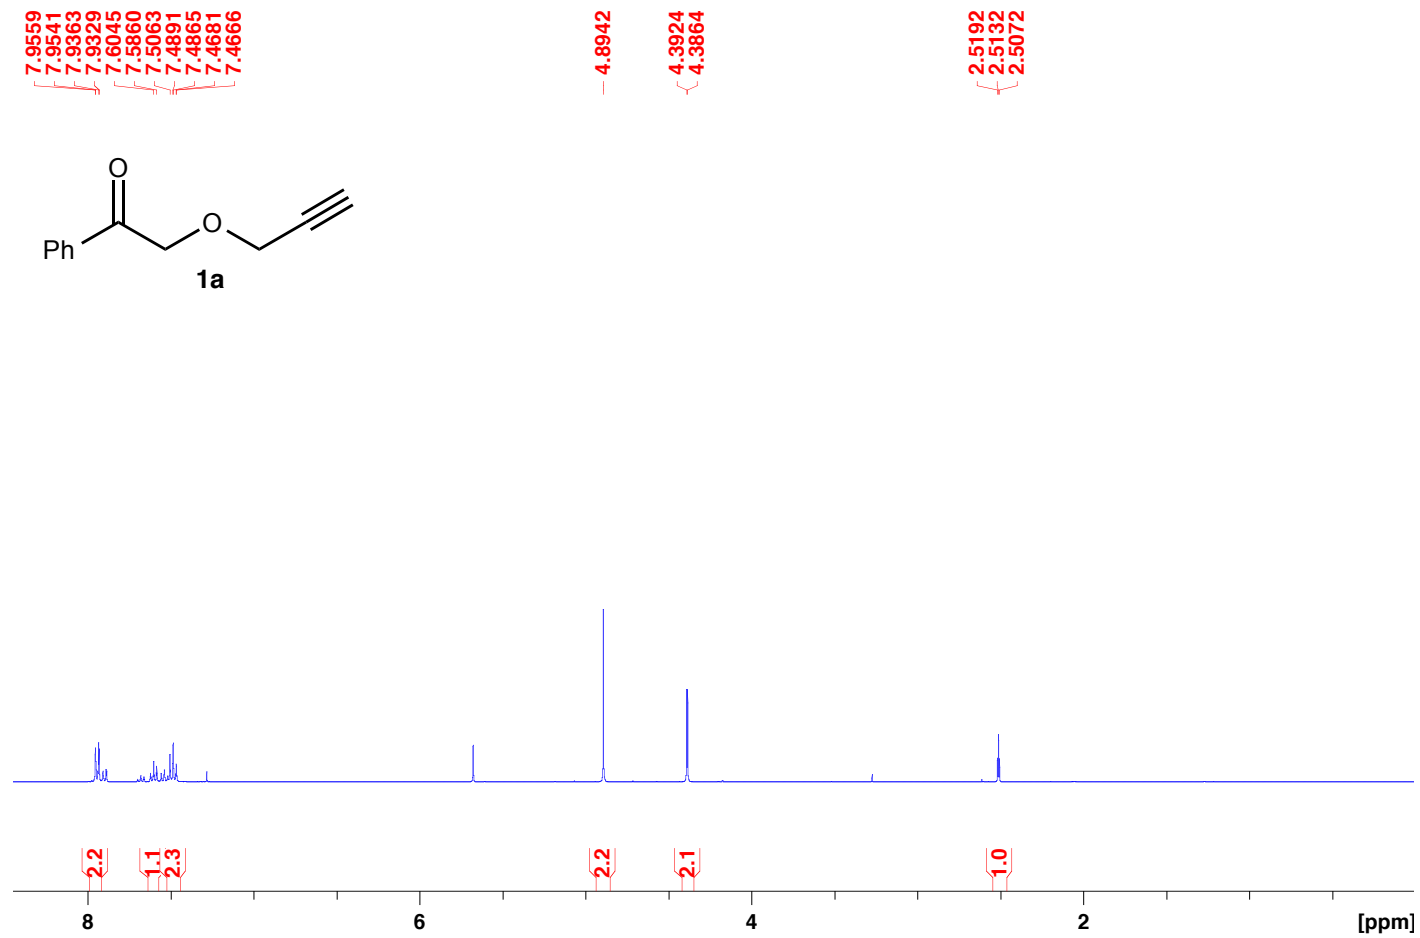



$^{13}\text{C}\{^1\text{H}\}$  NMR (100 MHz),  $\text{CDCl}_3$ , as an inseparable 4:1 mixture with diazoacetophenone

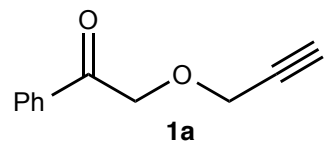

134.8442  
134.7649  
133.6721  
129.2293  
128.7641  
127.8481

78.7822  
75.6566  
71.5566

58.4122

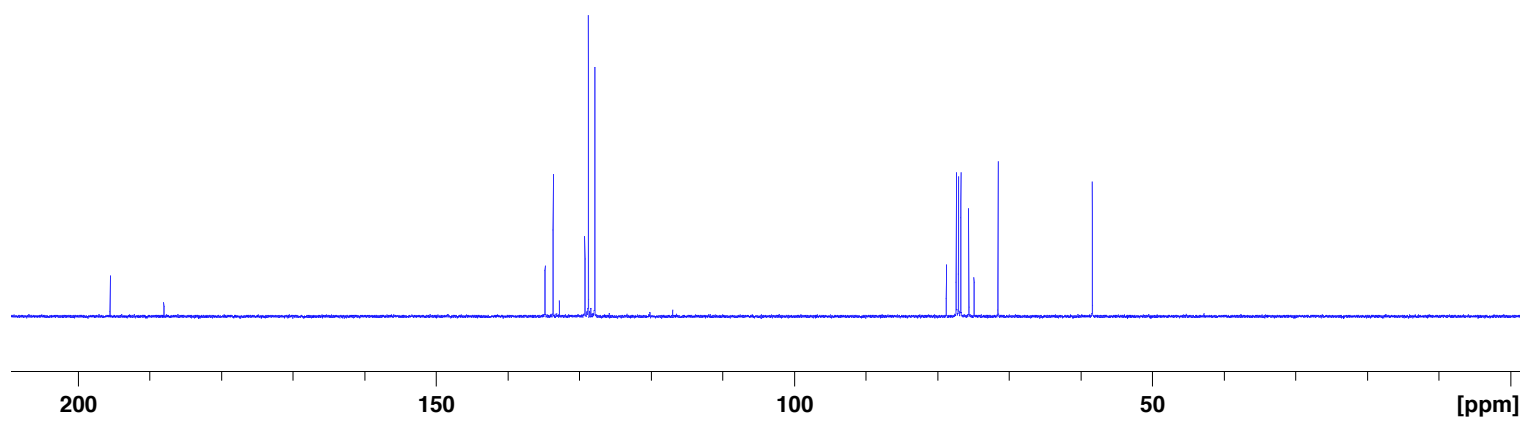

$^1\text{H}$  NMR (400 MHz),  $\text{CDCl}_3$ , as an inseparable 3:1 mixture with diazoacetophenone

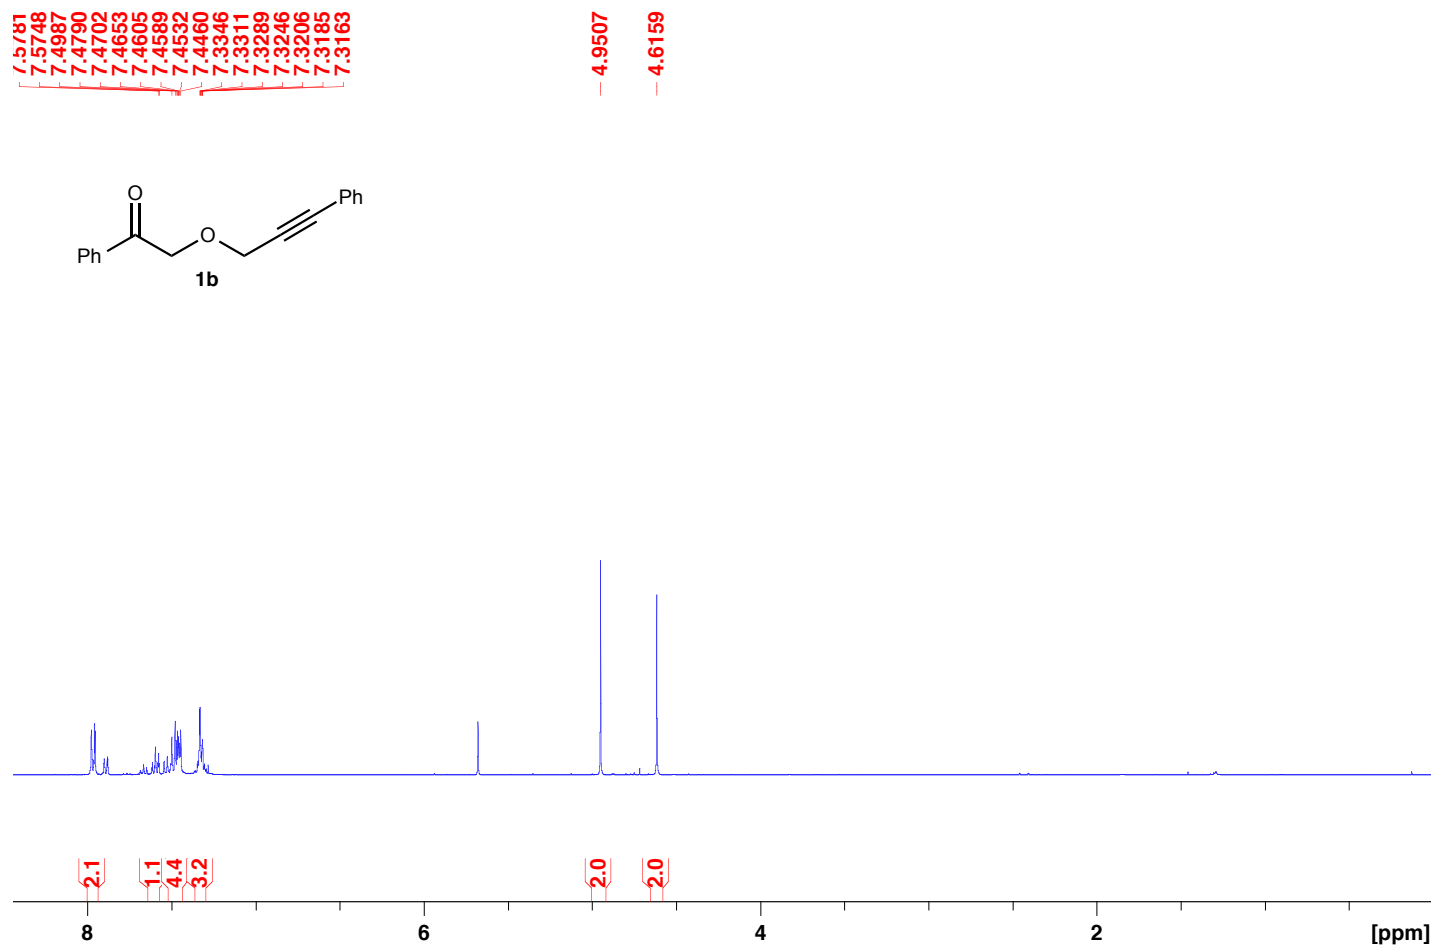

$^{13}\text{C}\{^1\text{H}\}$  NMR (100 MHz),  $\text{CDCl}_3$

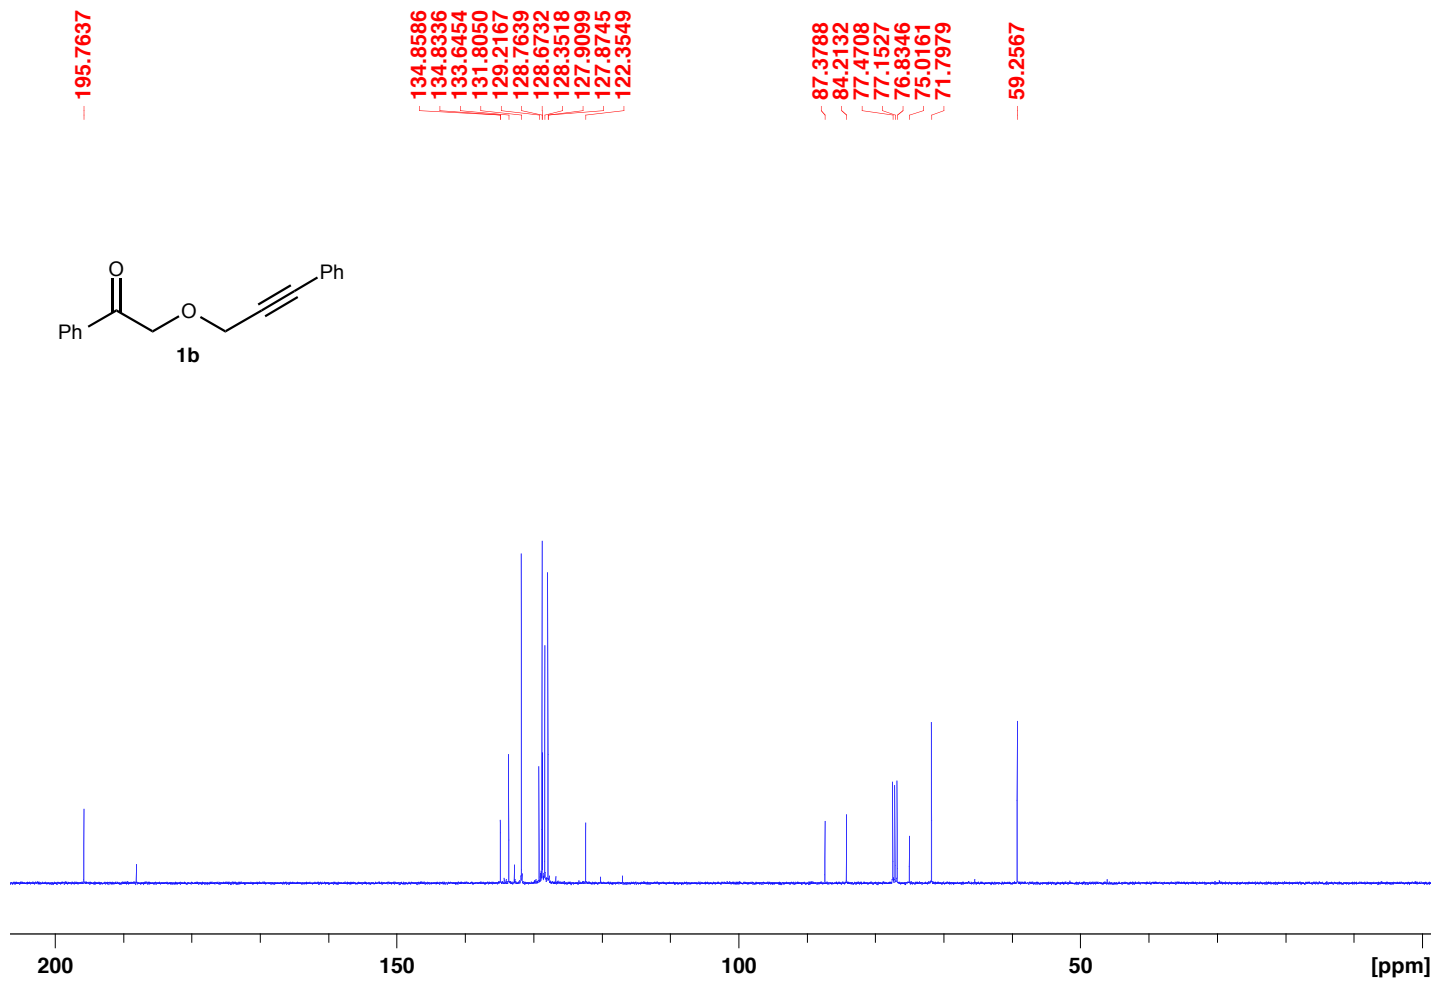

$^1\text{H}$  NMR (400 MHz),  $\text{CDCl}_3$

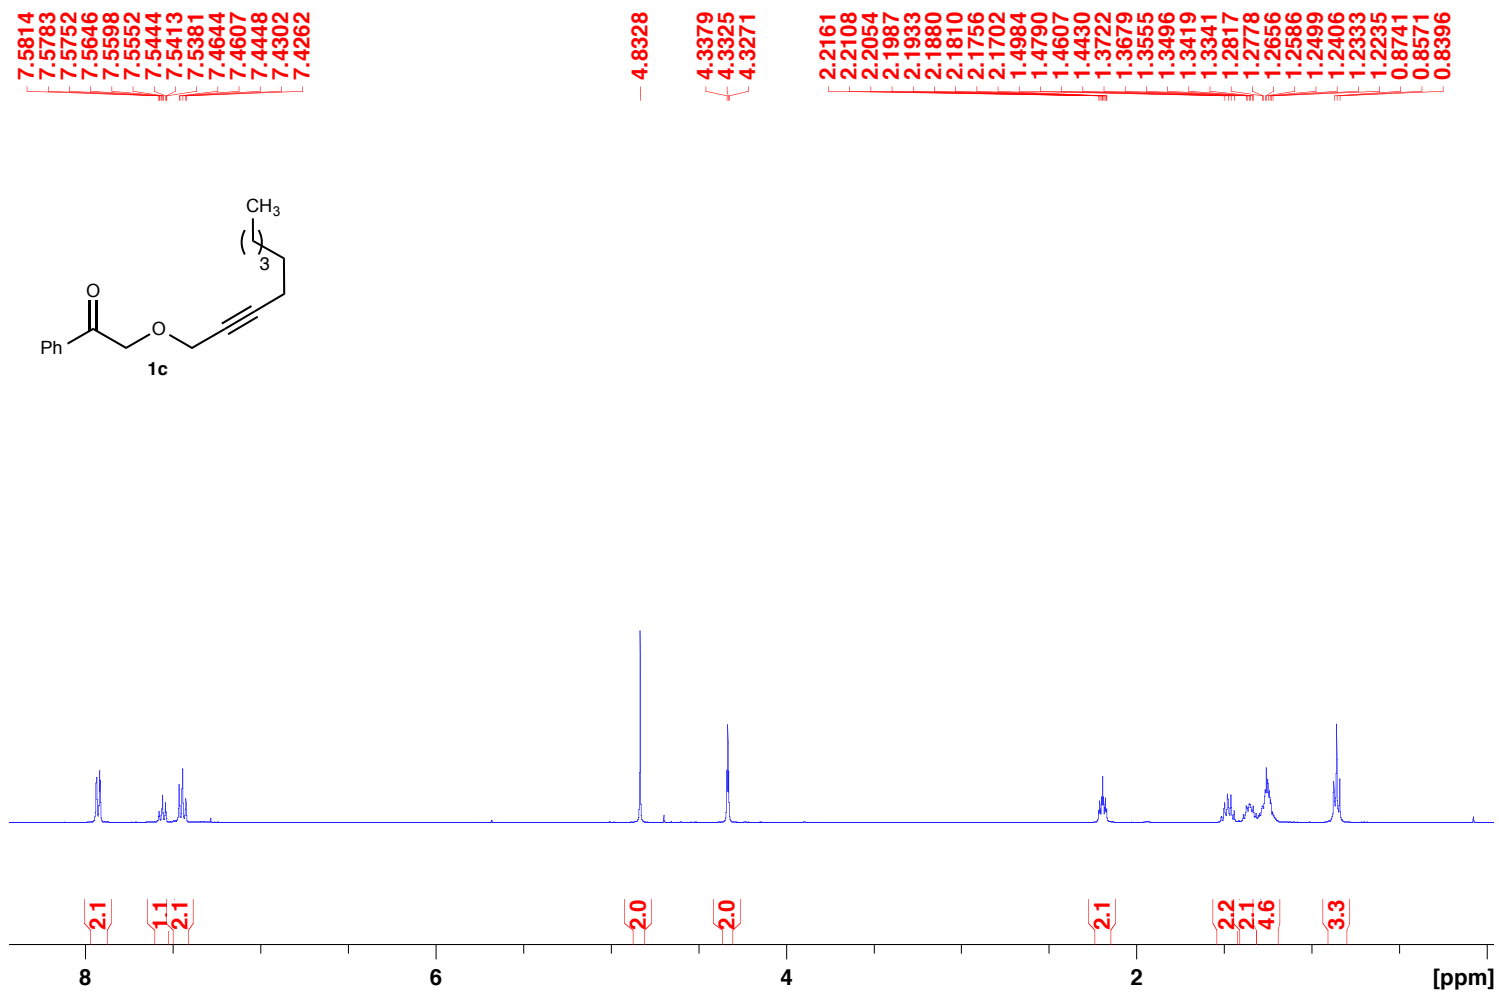

$^3\text{C}\{^1\text{H}\}$  NMR (100 MHz),  $\text{CDCl}_3$

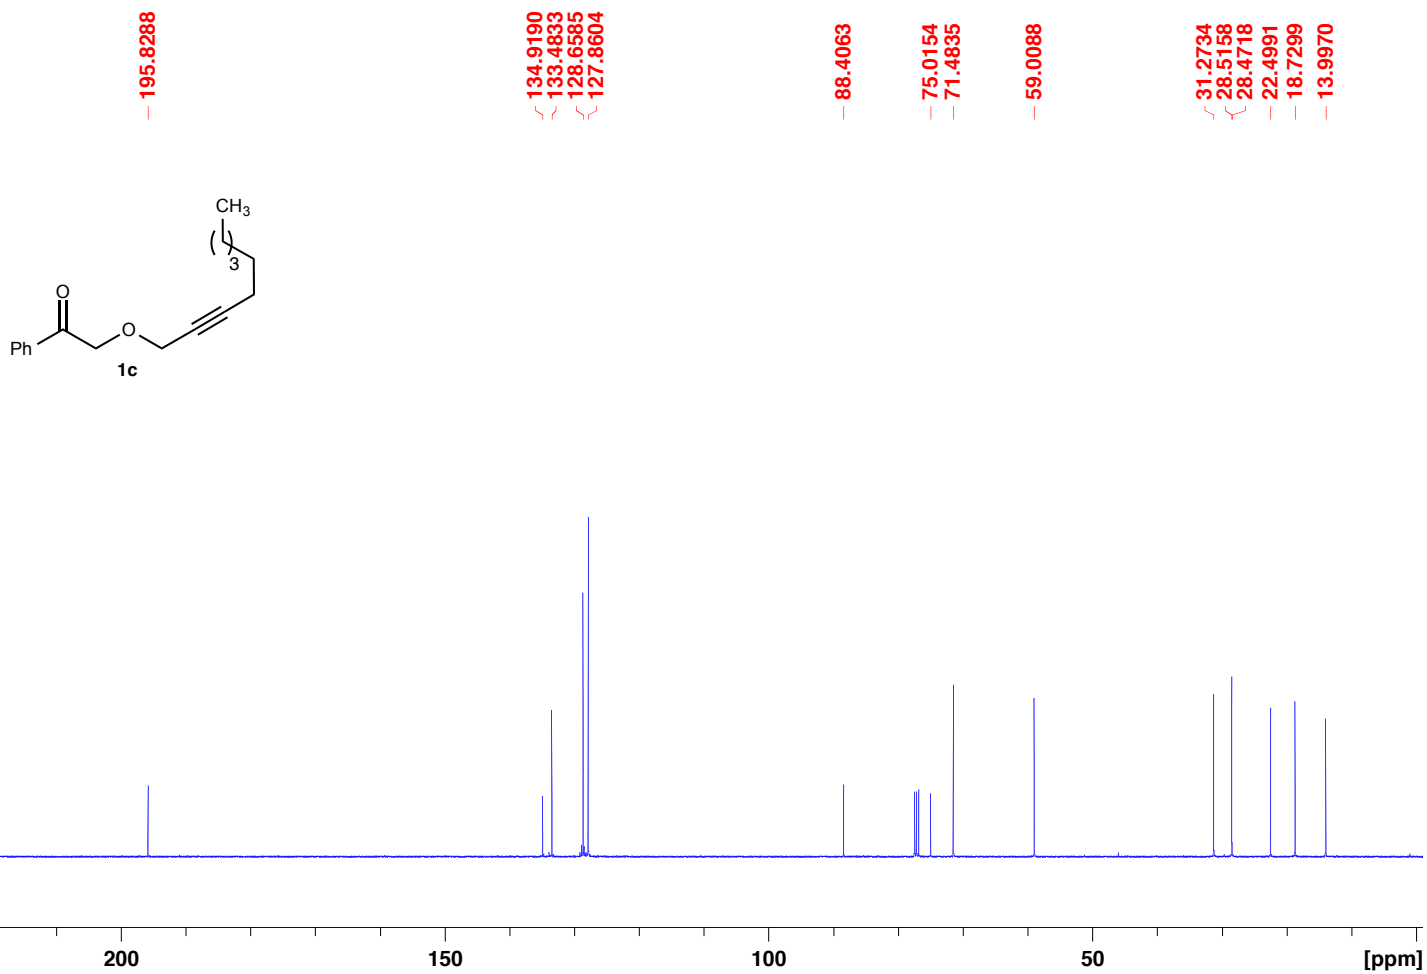

$^1\text{H}$  NMR (400 MHz),  $\text{CDCl}_3$

7.9467  
7.6107  
7.5922  
7.5770  
7.5737  
7.5704  
7.4993  
7.4984  
7.4946  
7.4816  
7.4787  
7.4755  
7.4646  
7.4604  
7.4586

4.8541  
4.3757  
4.3706  
2.4179  
2.4136  
2.4089  
2.4043  
2.4000  
2.3951  
1.8063  
1.8026  
1.7925  
1.7768  
1.7710  
1.7225  
1.7150  
1.7076  
1.6989  
1.6935  
1.6840  
1.6748  
1.6702  
1.6597  
1.6538  
1.5209  
1.5139  
1.5071  
1.4734  
1.4656  
1.4494  
1.4406  
1.4255  
1.4175  
1.4084  
1.3922  
1.3878  
1.3859  
1.3194  
1.3113  
1.3086  
1.2948  
1.2918  
1.2796  
1.2723  
1.2635

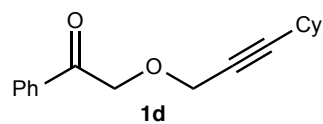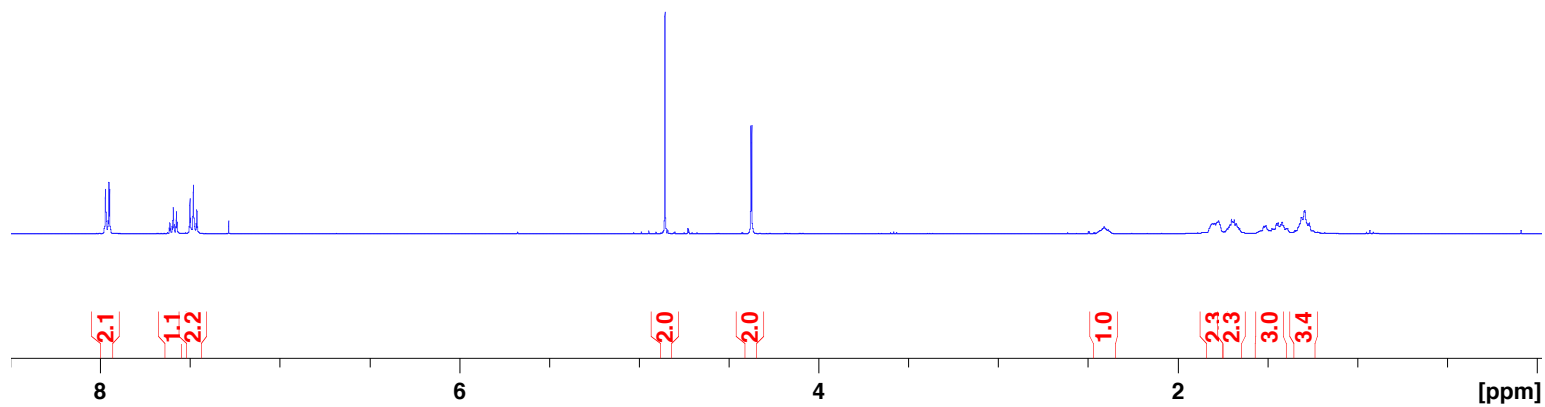

$^{13}\text{C}\{^1\text{H}\}$  NMR (100 MHz),  $\text{CDCl}_3$

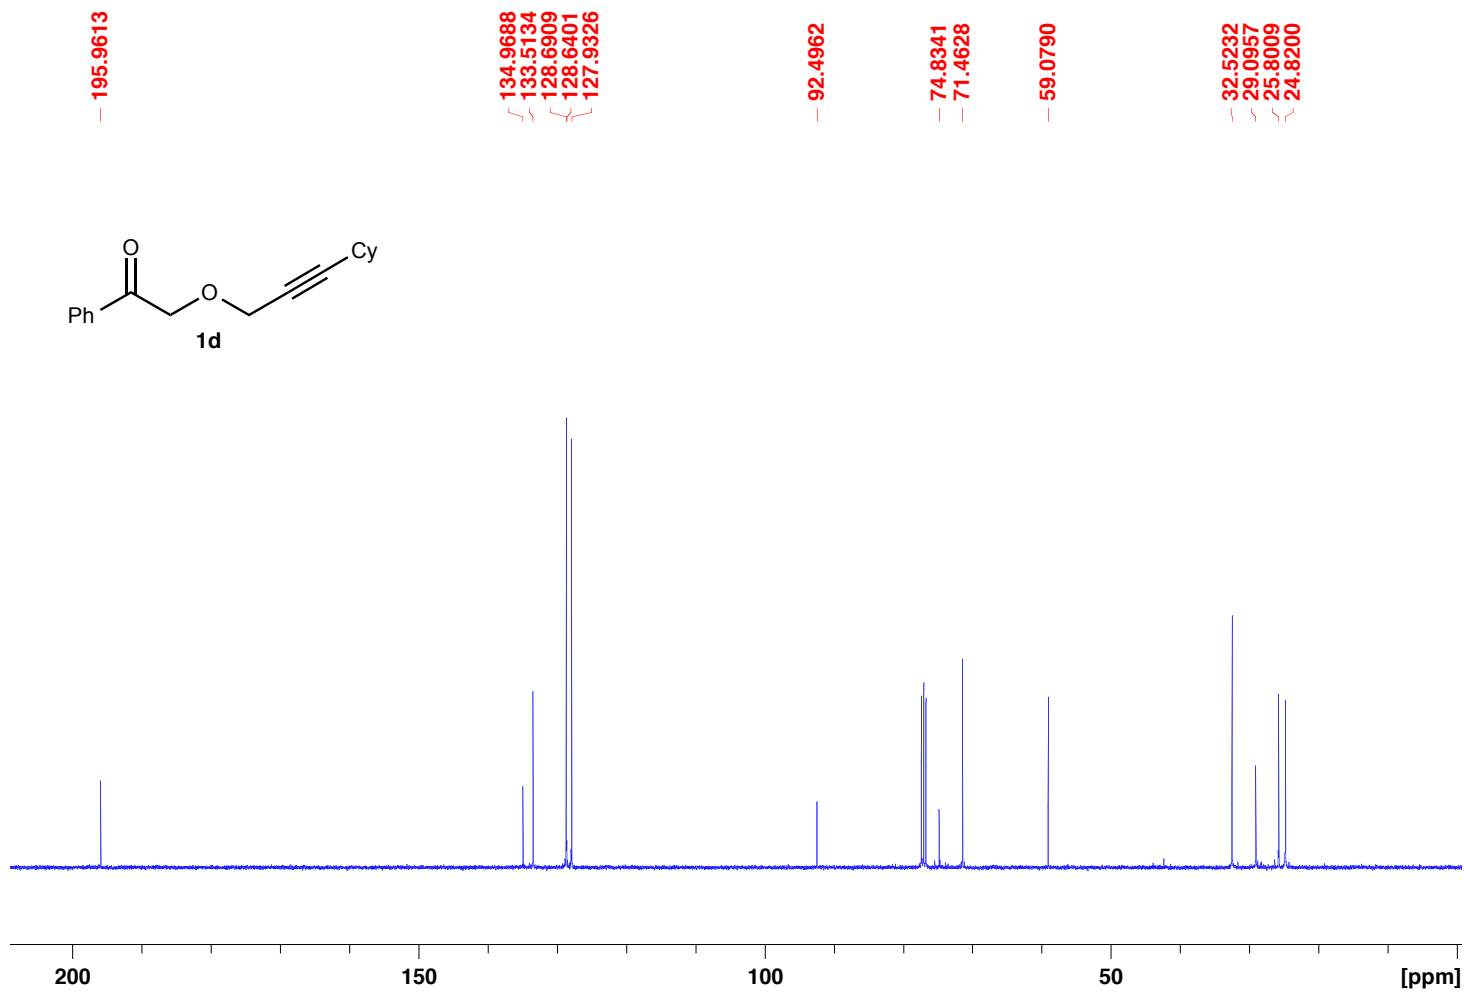

$^1\text{H}$  NMR (400 MHz),  $\text{CDCl}_3$

7.9403  
7.6006  
7.5821  
7.5668  
7.5635  
7.5603  
7.4889  
7.4851  
7.4722  
7.4694  
7.4661  
7.4551  
7.4509  
7.4492

4.8269

4.3456

1.2180

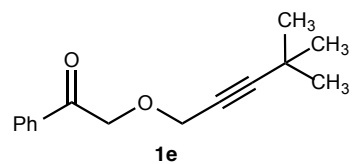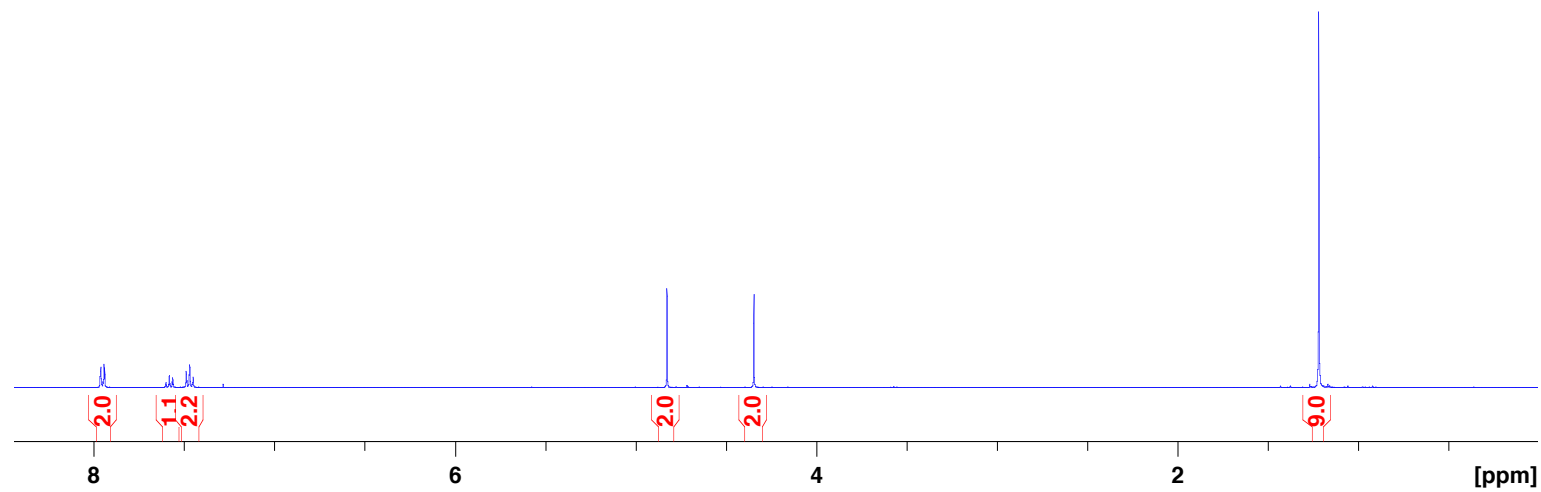



$^{13}\text{C}\{^1\text{H}\}$  NMR (100 MHz),  $\text{CDCl}_3$

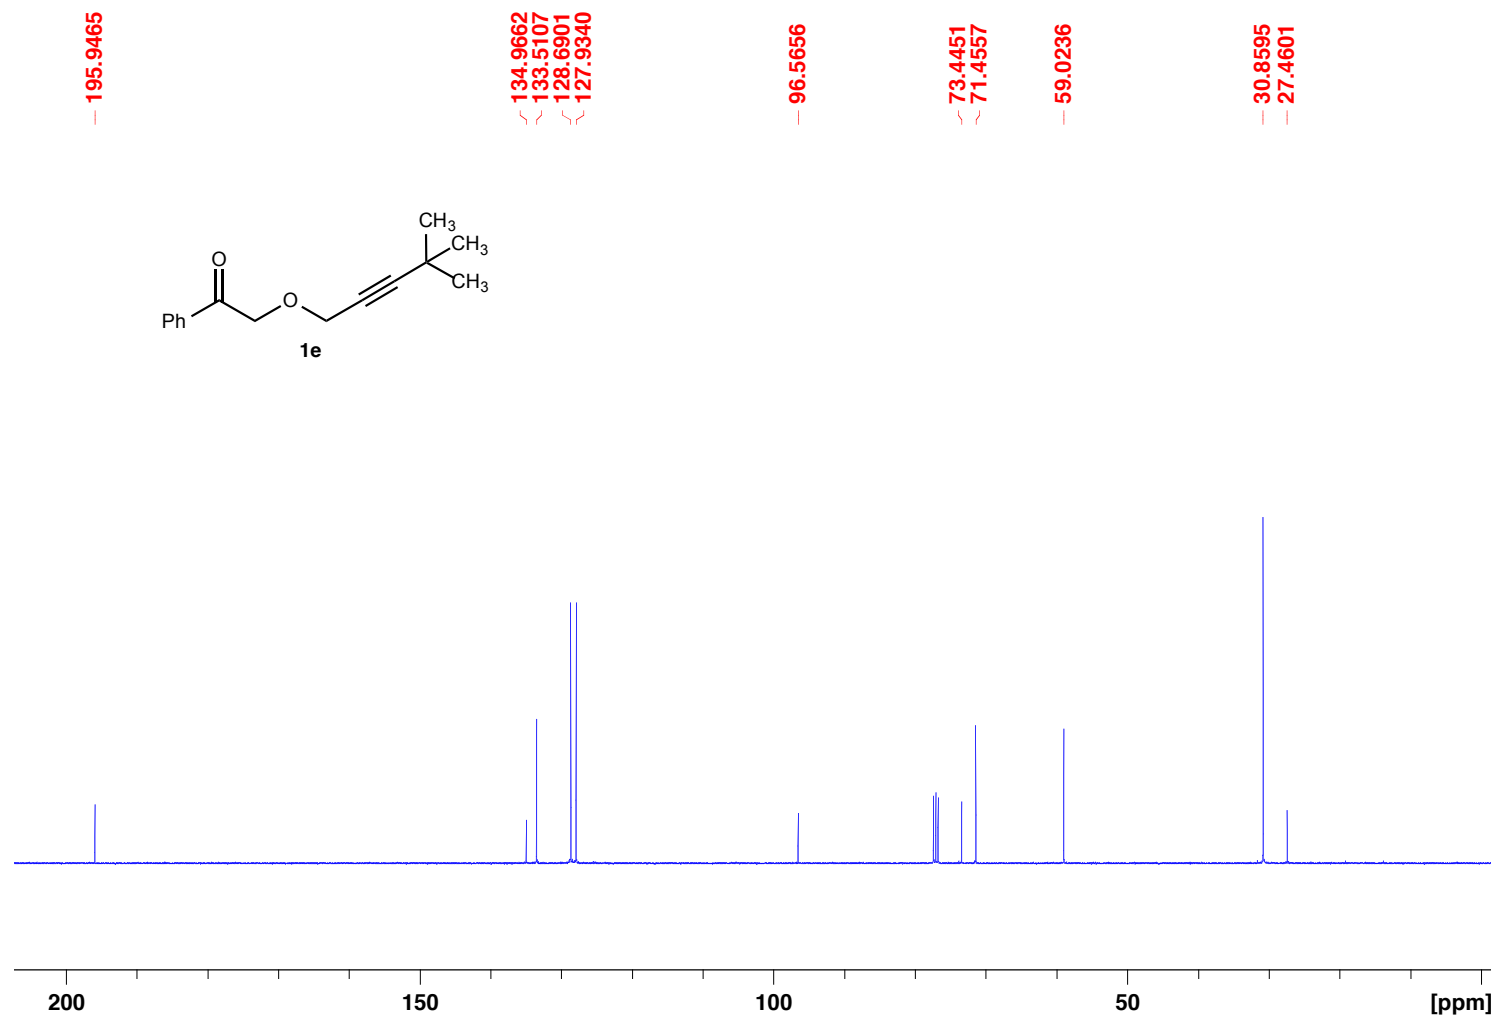

$^1\text{H}$  NMR (400 MHz),  $\text{CDCl}_3$

7.6140  
7.6033  
7.6001  
7.5969  
7.5255  
7.5217  
7.5060  
7.4873  
7.3357  
7.3174  
7.3039  
7.2993  
7.2840  
7.2618  
7.2583  
7.2409  
7.2228

5.0454  
5.0042  
4.8671  
4.8259  
4.3559  
4.3507  
4.3397  
4.3346  
4.3233  
4.3182  
2.9155  
2.8958  
2.8760  
2.5658  
2.5606  
2.2881  
2.2710  
2.2689  
2.2540  
2.2523  
2.2371  
2.2346  
2.2177  
2.2152  
2.2015  
2.1982  
2.1857  
2.1824  
2.1668  
2.1619  
2.1518  
2.1474  
2.1318  
2.1279  
2.1120

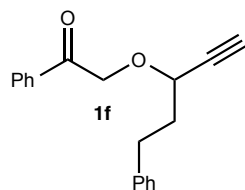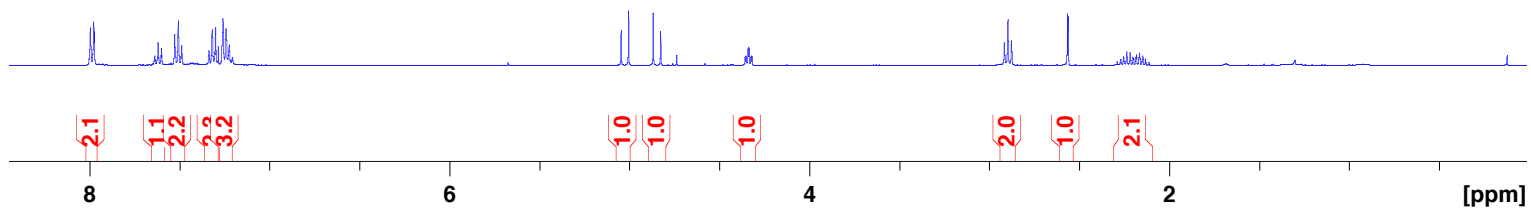

$^{13}\text{C}\{^1\text{H}\}$  NMR (100 MHz),  $\text{CDCl}_3$

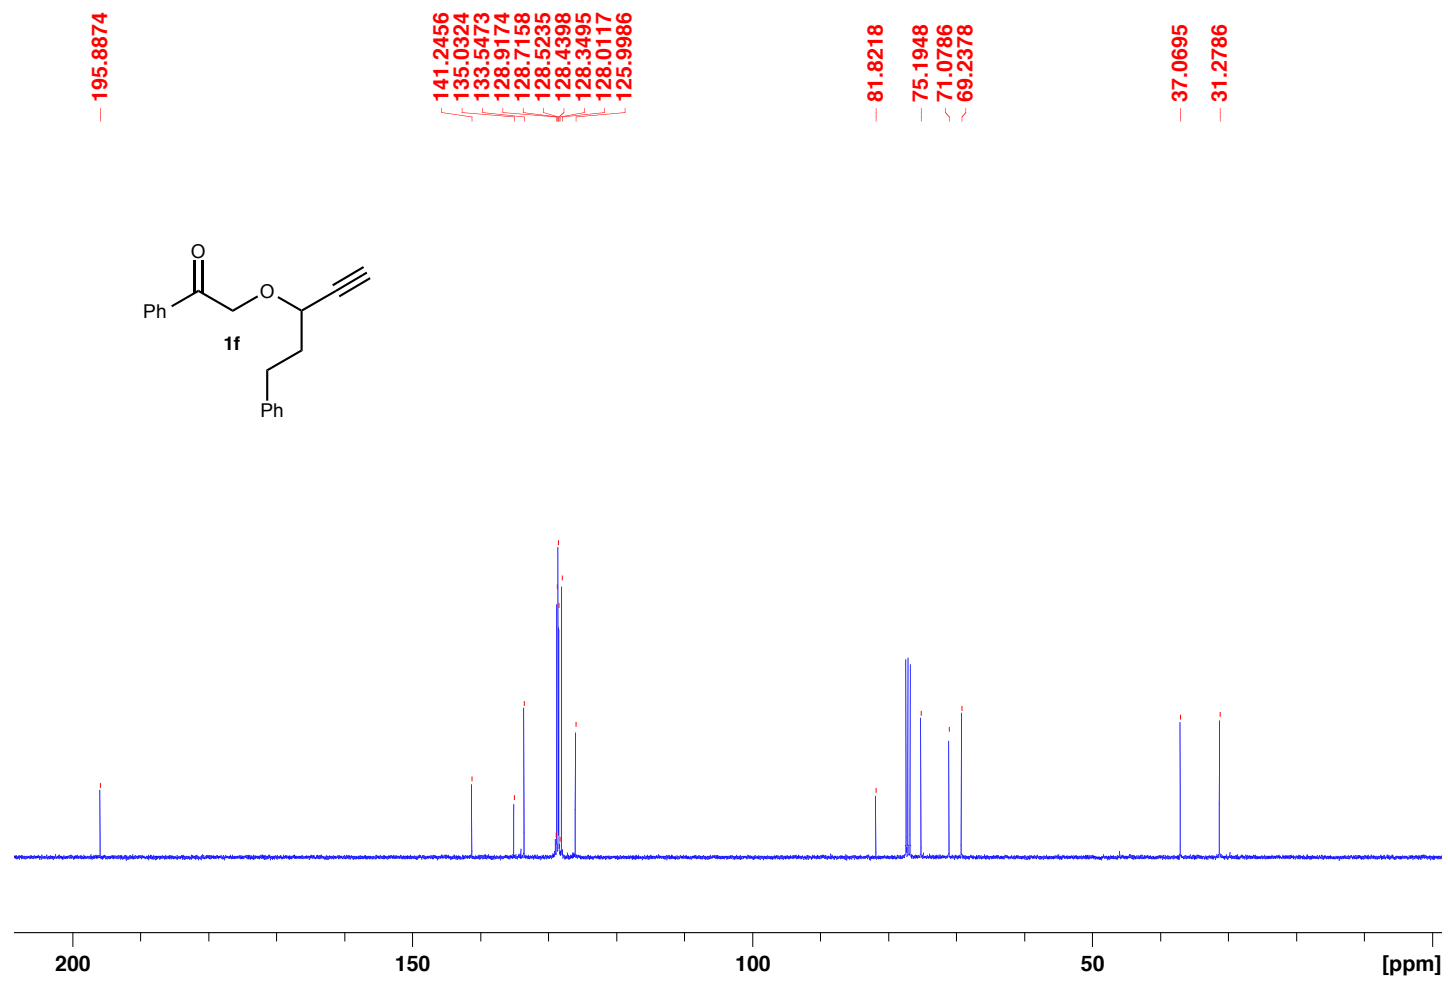

$^1\text{H}$  NMR (400 MHz),  $\text{CDCl}_3$

7.5925  
7.5822  
7.5772  
7.5725  
7.5620  
7.5587  
7.5554  
7.4889  
7.4847  
7.4809  
7.4679  
7.4651  
7.4509  
7.4468  
7.4451

4.9828  
4.9417  
4.8368  
4.7957  
4.1051  
4.0999  
4.0897  
4.0844  
2.5002  
2.4950  
1.9443  
1.9206  
1.8925  
1.7846  
1.7763  
1.7689  
1.7560  
1.7540  
1.7493  
1.6915  
1.6884  
1.6853  
1.6815  
1.6655  
1.6612  
1.6584  
1.2891  
1.2863  
1.2783  
1.2667  
1.2586  
1.2545  
1.2475  
1.2233  
1.2110  
1.2028  
1.2002  
1.1916  
1.1888  
1.1800  
1.1742  
1.1604  
1.1573

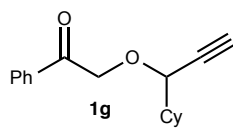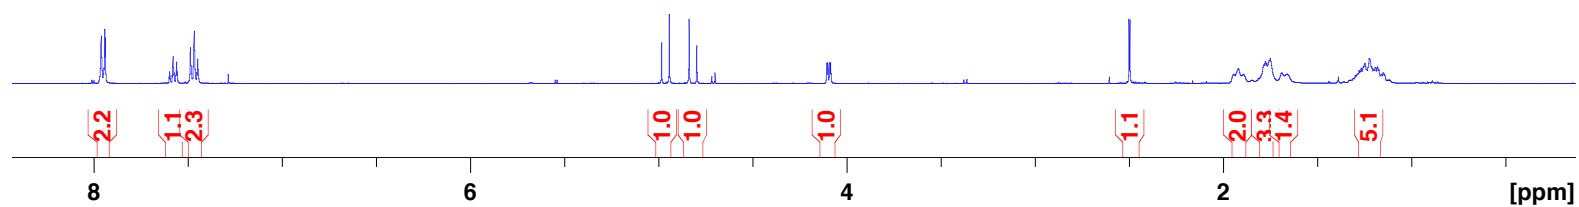

$^{13}\text{C}\{^1\text{H}\}$  NMR (100 MHz),  $\text{CDCl}_3$

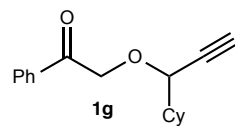

— 196.1680

135.0778  
133.4382  
128.6348  
128.0207

81.1436  
75.5151  
74.7134  
71.1264

— 42.3852

28.8096  
28.2171  
26.3671  
25.8604  
25.8176

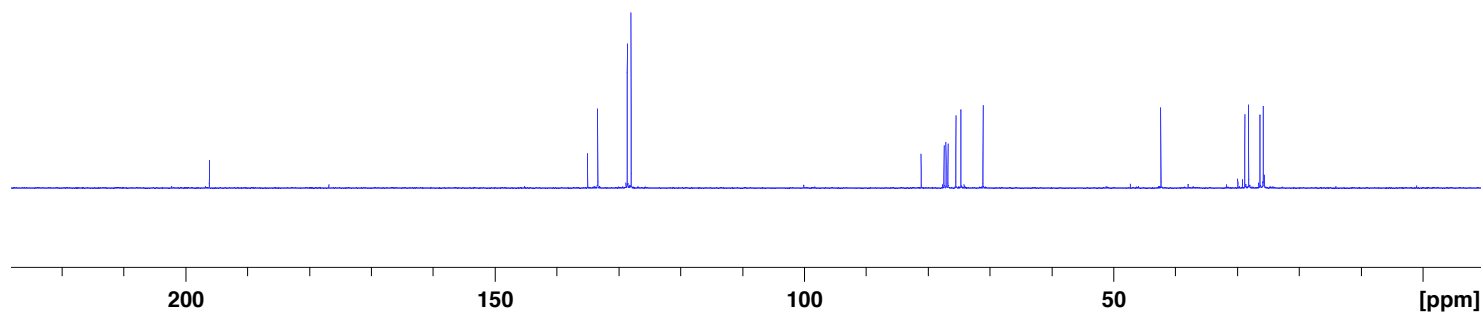

$^1\text{H}$  NMR (400 MHz),  $\text{CDCl}_3$

7.6084  
7.5981  
7.5931  
7.5883  
7.5779  
7.5746  
7.5713  
7.5060  
7.5019  
7.4982  
7.4852  
7.4823  
7.4680  
7.4639  
7.4622

5.0009  
4.9604  
4.8139  
4.7734

3.9598  
3.9546

2.4864  
2.4812

1.0686

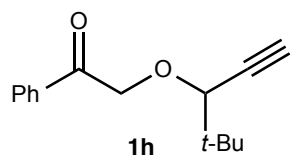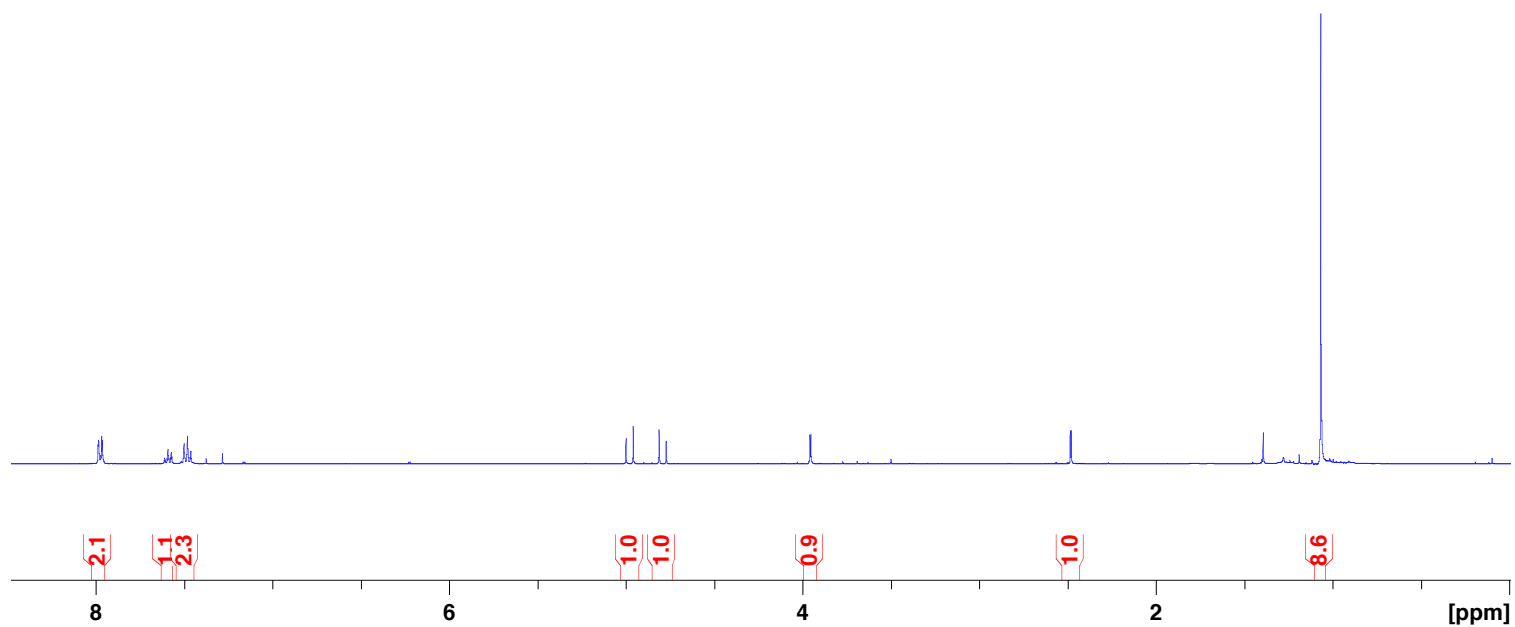

$^{13}\text{C}\{^1\text{H}\}$  NMR (100 MHz),  $\text{CDCl}_3$

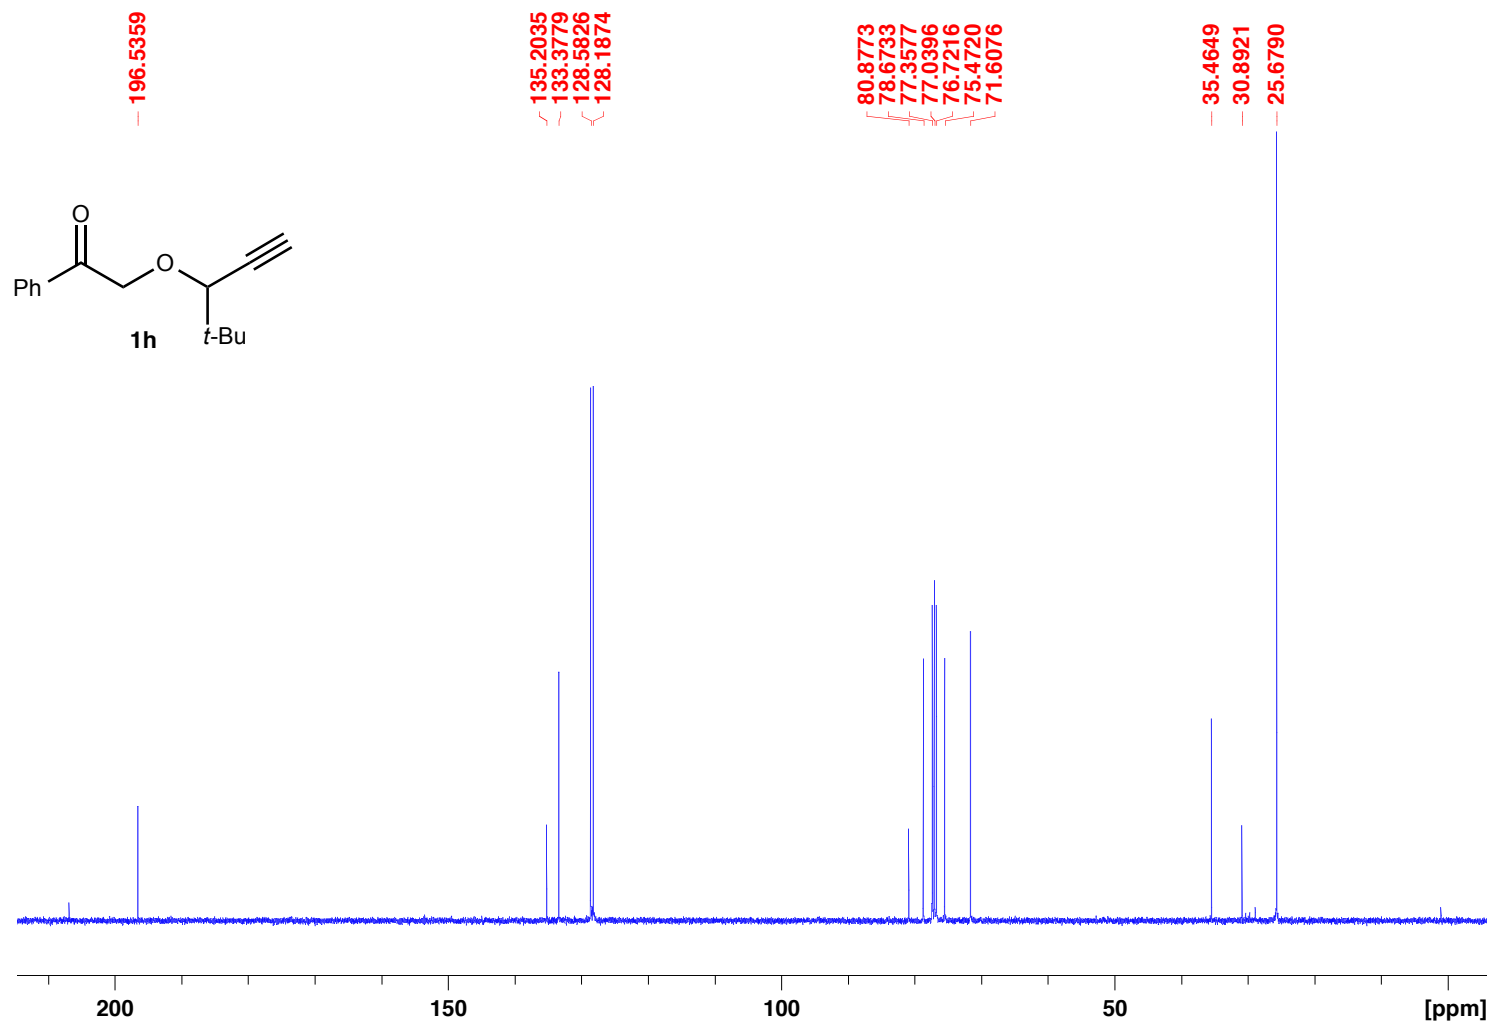





$^1\text{H}$  NMR (400 MHz),  $\text{CDCl}_3$

7.3192  
7.3009  
7.2845  
7.2463  
7.2286  
7.2196  
7.2018

4.6819  
4.6424  
4.5315  
4.4919  
4.2253  
4.2201  
4.2091  
4.1935  
2.8658  
2.8459  
2.8261  
2.8184  
2.2713  
2.2660  
2.2582  
2.2546  
2.1567  
2.1382  
2.1211  
2.1022  
2.0853  
2.0832  
2.0669  
2.0482  
2.0321  
1.5625  
1.5446  
1.5250  
1.5076  
1.4453  
1.4290  
1.4082  
1.3920  
1.3510  
1.3296  
1.3214  
1.3119  
1.3063  
1.2957  
1.2878  
0.9357  
0.9200  
0.9187  
0.9021

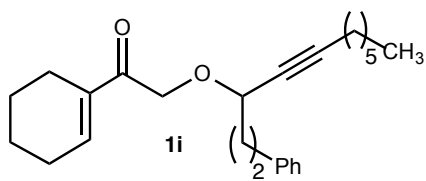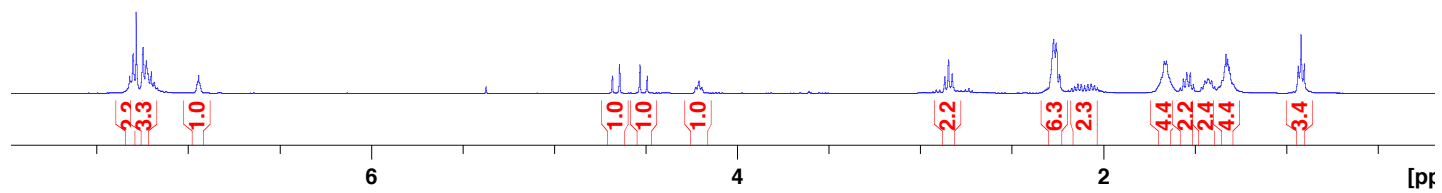

$^{13}\text{C}\{^1\text{H}\}$  NMR (100 MHz),  $\text{CDCl}_3$

196.9195

141.7121  
140.3075  
137.6294  
128.5064  
128.3998  
128.3328  
125.8098

87.6113

78.2541

69.9365  
69.5712

37.5044  
31.5273  
31.3253  
28.6543  
28.5528  
26.0080  
22.9190  
22.5737  
21.8072  
21.5437  
18.7302  
14.0444

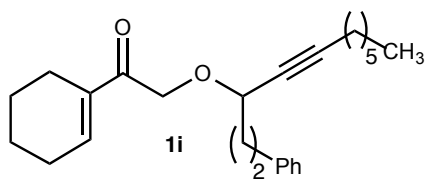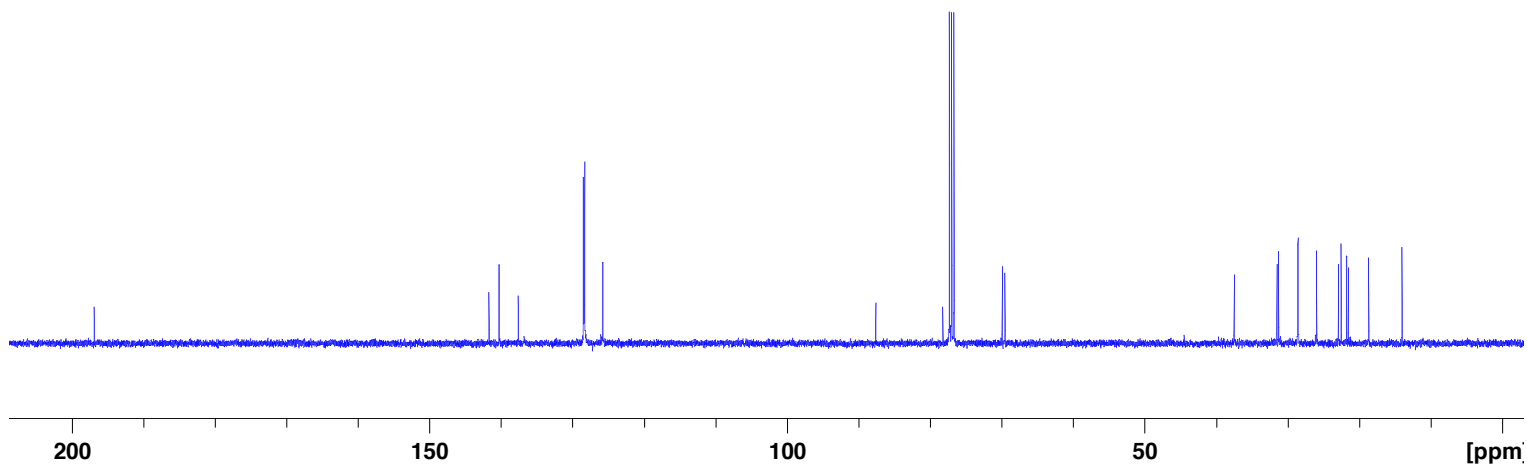

$^1\text{H}$  NMR (400 MHz),  $\text{CDCl}_3$

7.4180  
7.4151  
7.4117  
7.4093  
7.3065  
7.3010  
7.2927  
7.2891  
6.9211  
6.9154  
6.9112  
6.9071  
6.9016

4.7206  
4.6806  
4.6050  
4.5756  
4.5649  
4.5592  
4.5427  
4.5262

2.2729  
2.2667  
2.2583  
2.2467  
2.2308  
2.2227  
2.2196  
2.2196  
1.6445  
1.6405  
1.6345  
1.6329  
1.6304  
1.6257  
1.6197  
1.6169  
1.6100  
1.6046  
1.6015  
1.5957  
1.5793

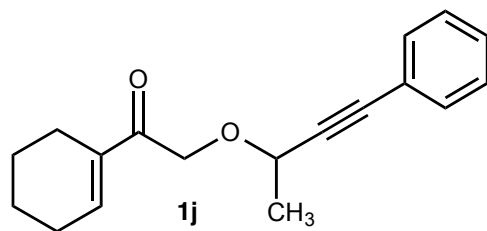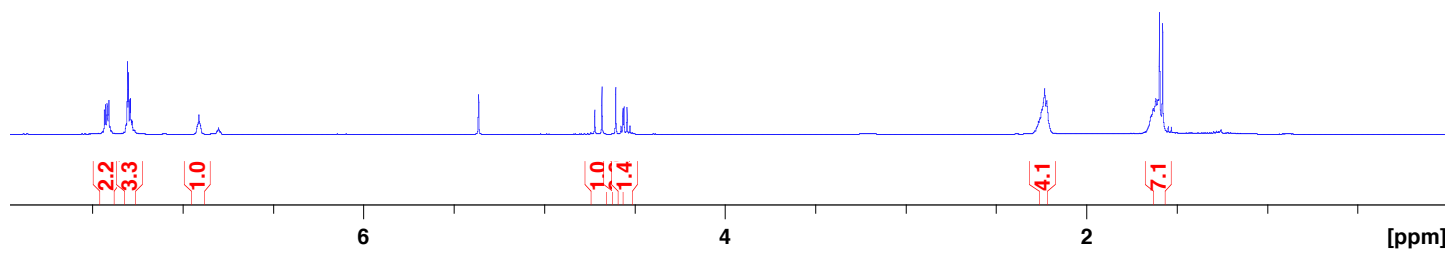

$^{13}\text{C}\{^1\text{H}\}$  NMR (100 MHz),  $\text{CDCl}_3$

— 196.6265

— 142.7473  
— 140.4370  
— 137.4991  
— 136.6085  
— 131.7013  
— 128.4427  
— 128.2746  
— 122.5079

— 88.4070  
— 85.6466

— 74.5392  
— 69.9810  
— 66.1389

— 25.9574  
— 22.8719  
— 22.0480  
— 21.7366  
— 21.4746

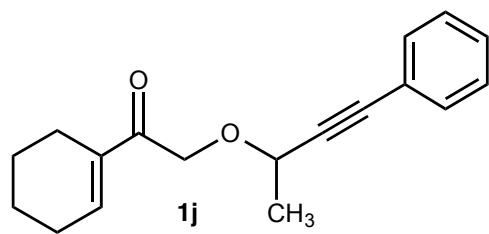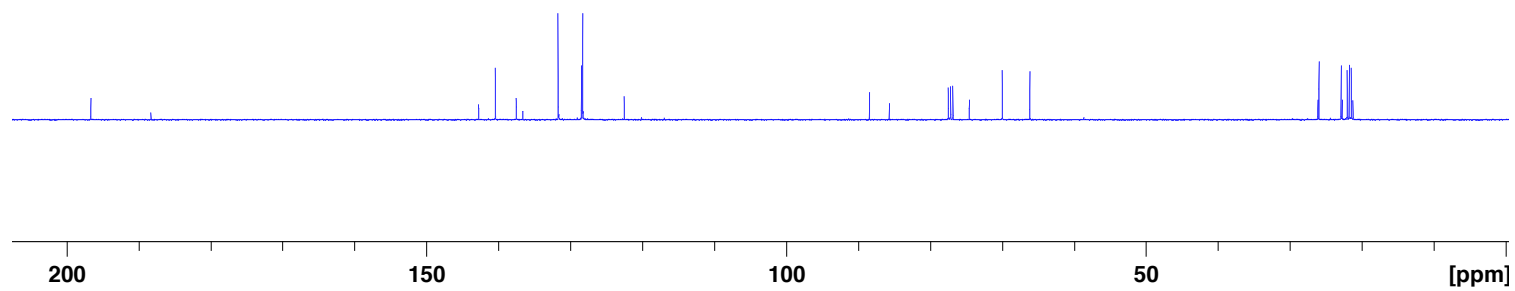

$^1\text{H}$  NMR (400 MHz),  $\text{CDCl}_3$

7.4636  
7.4601  
7.4259  
7.4231  
7.4213  
7.4180  
7.4057  
7.4022  
7.3982  
7.3883  
7.3845  
7.3815

4.4873  
4.4840  
4.4796  
4.4676  
4.4632  
4.4513  
4.4468  
4.3919  
2.4361  
2.4321  
2.4226  
2.4183  
2.4132  
2.4093  
2.4041  
2.4000  
2.3904  
2.3866  
1.8099  
1.8058  
1.7957  
1.7739  
1.7283  
1.7183  
1.7129  
1.7043  
1.6962  
1.6887  
1.6796  
1.6752  
1.6687  
1.5285  
1.5122  
1.4860  
1.4786  
1.4624  
1.4543  
1.4470  
1.4386  
1.4310  
1.4224  
1.4067  
1.3340  
1.3207  
1.3025  
1.2897  
1.2811  
1.2740

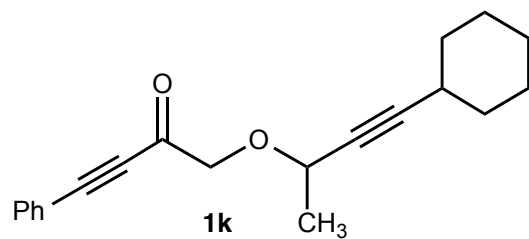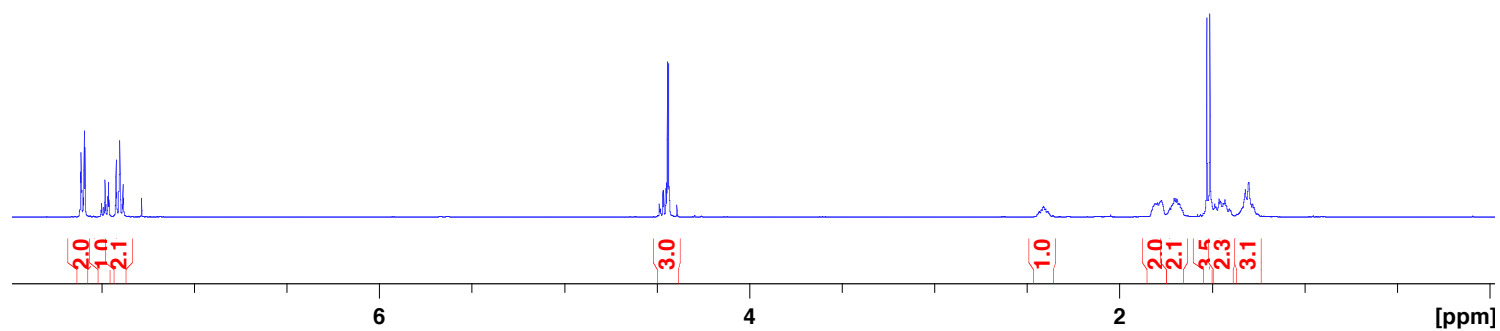

$^{13}\text{C}\{^1\text{H}\}$  NMR (100 MHz),  $\text{CDCl}_3$

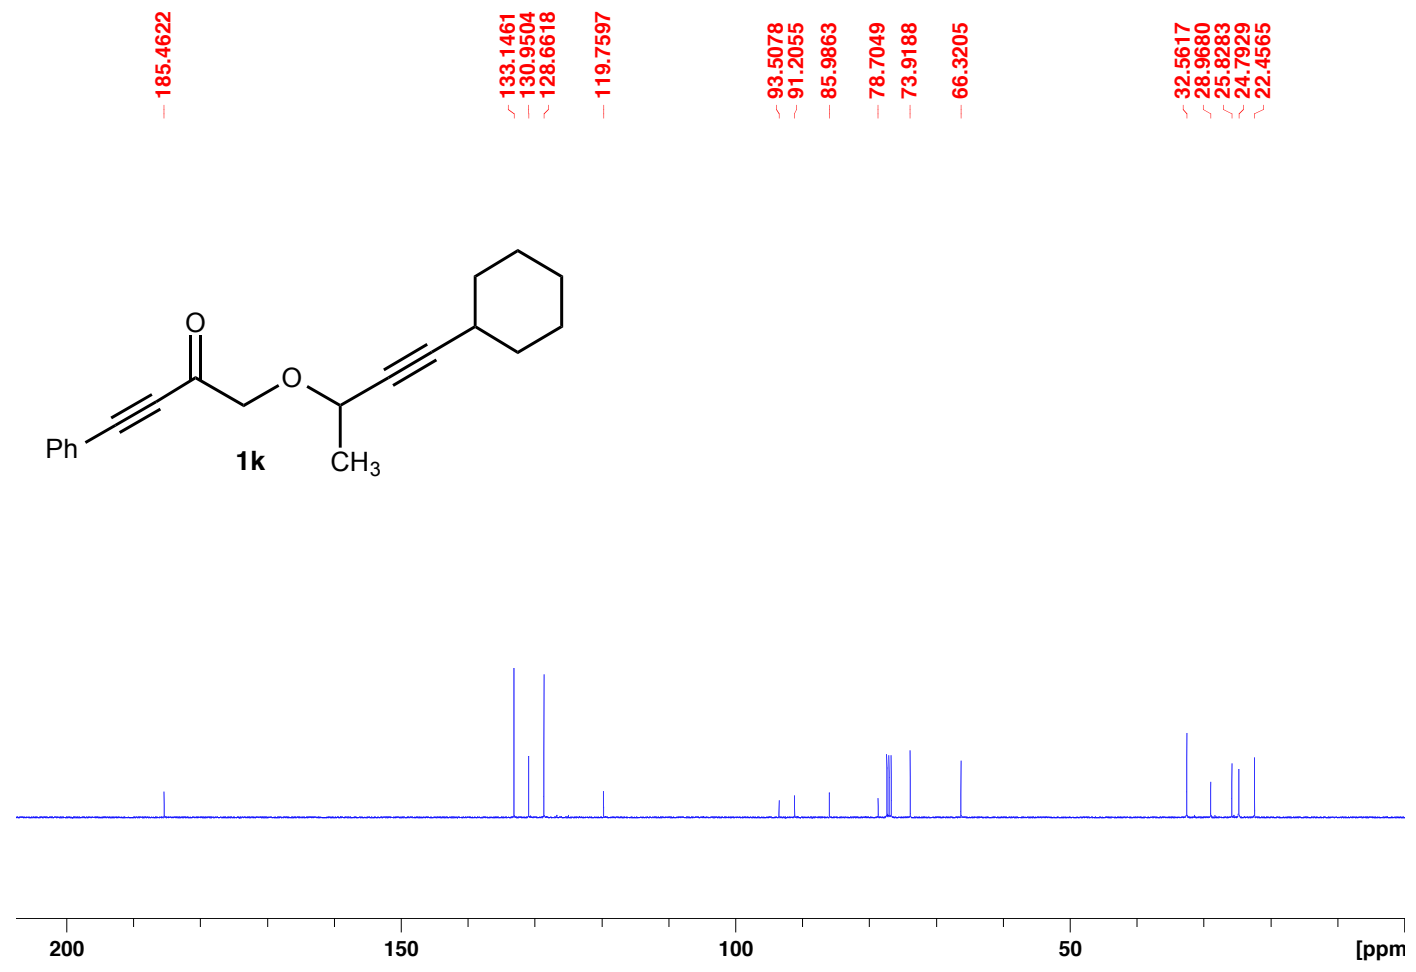

$^1\text{H}$  NMR (400 MHz),  $\text{CDCl}_3$

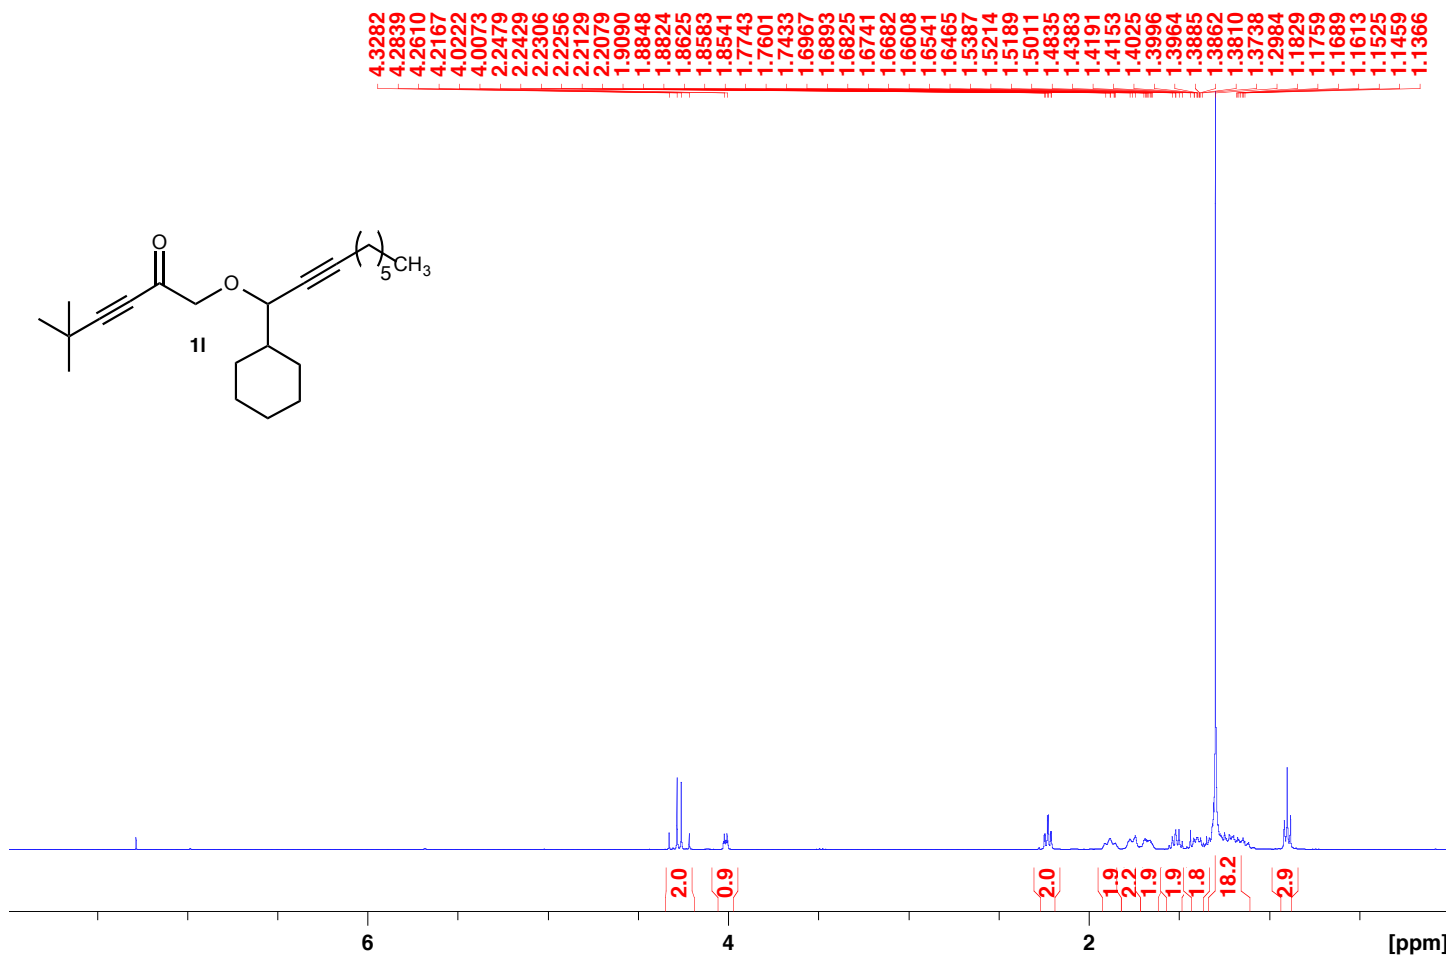

$^{13}\text{C}\{^1\text{H}\}$  NMR (100 MHz),  $\text{CDCl}_3$

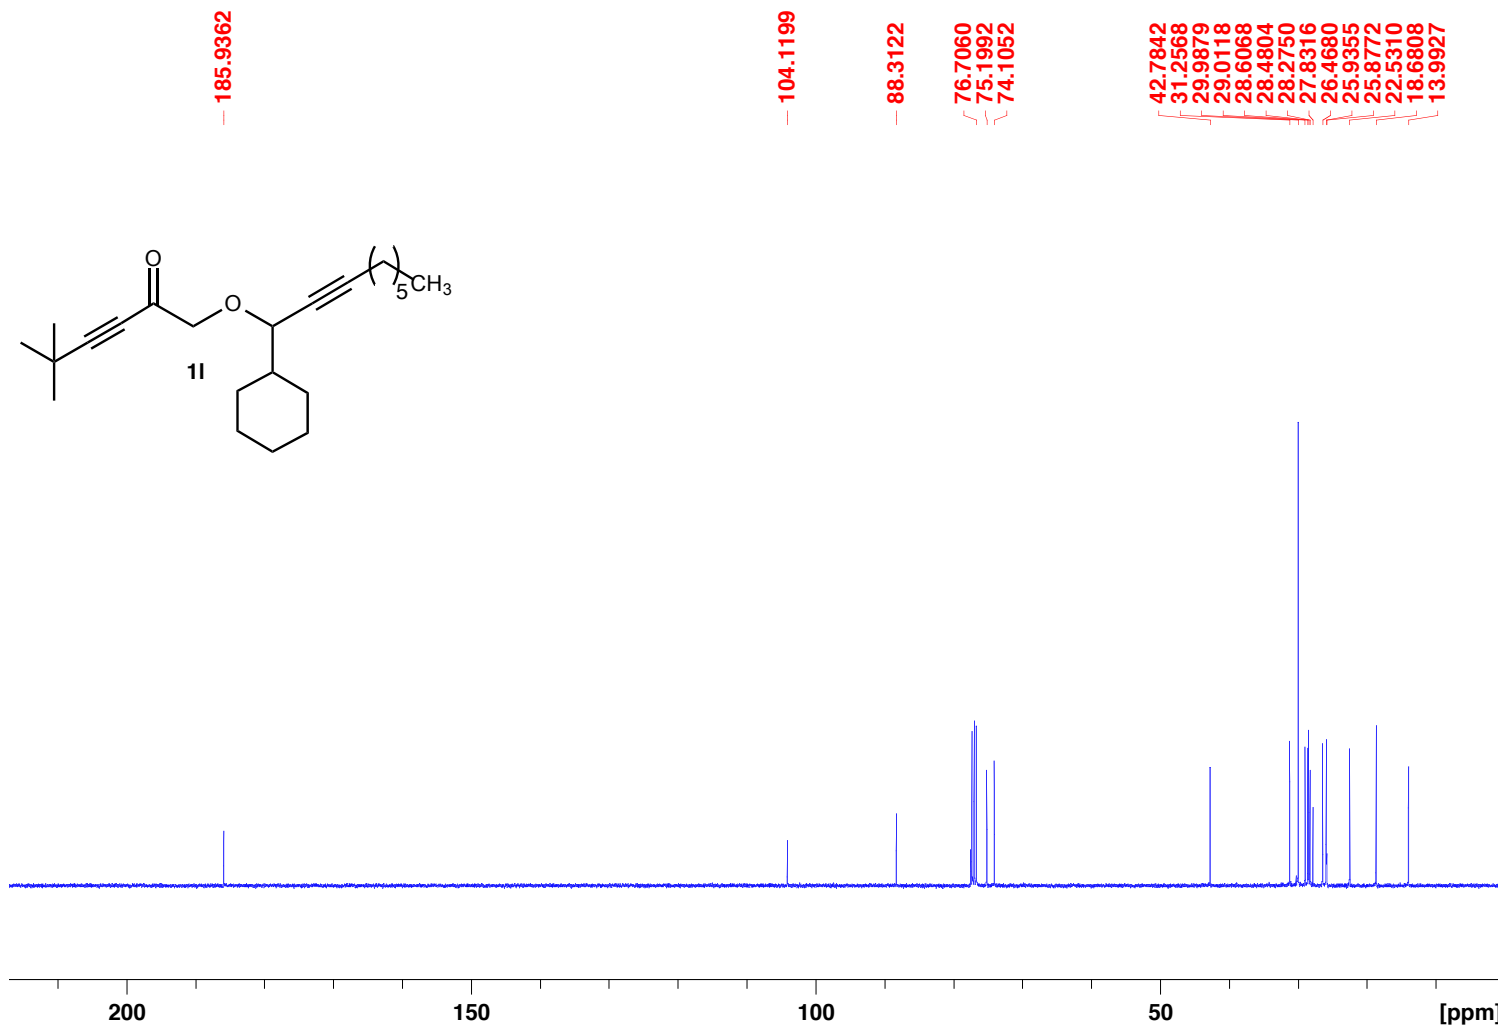



$^1\text{H}$  NMR (400 MHz),  $\text{CDCl}_3$

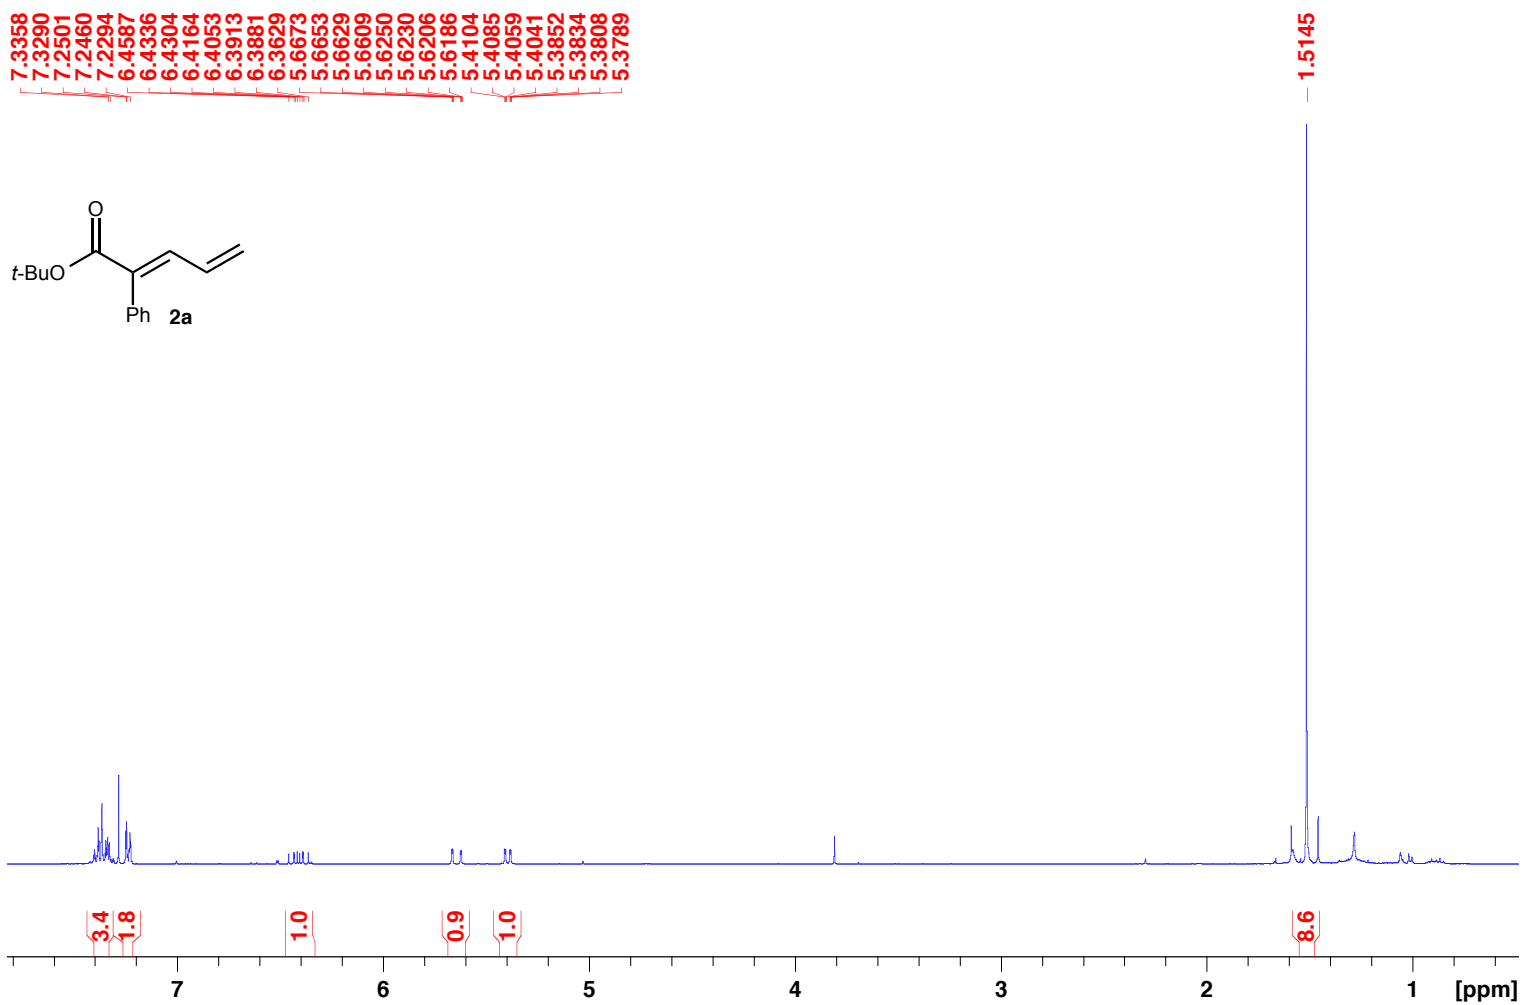

$^{13}\text{C}\{^1\text{H}\}$  NMR (100 MHz),  $\text{CDCl}_3$

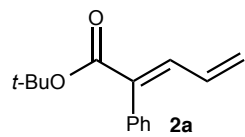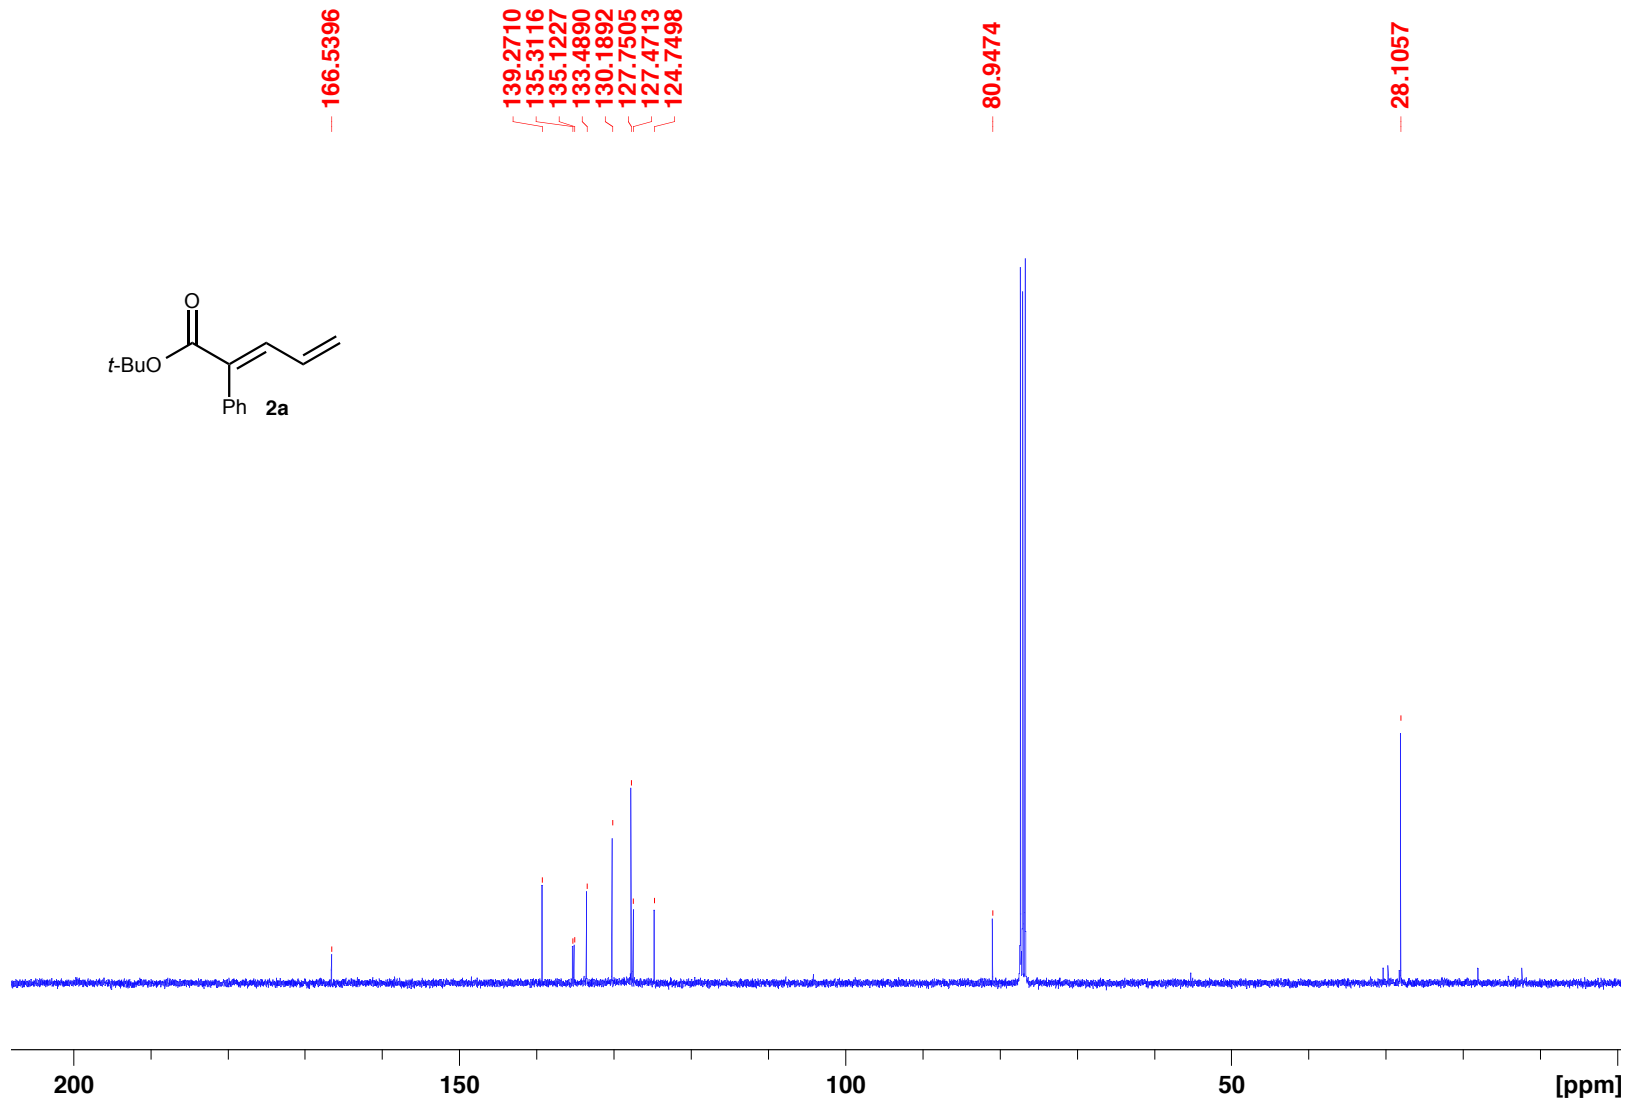

$^1\text{H}$  NMR (400 MHz),  $\text{CDCl}_3$ , as an inseparable 3:1 *E*:*Z* mixture of stereoisomers

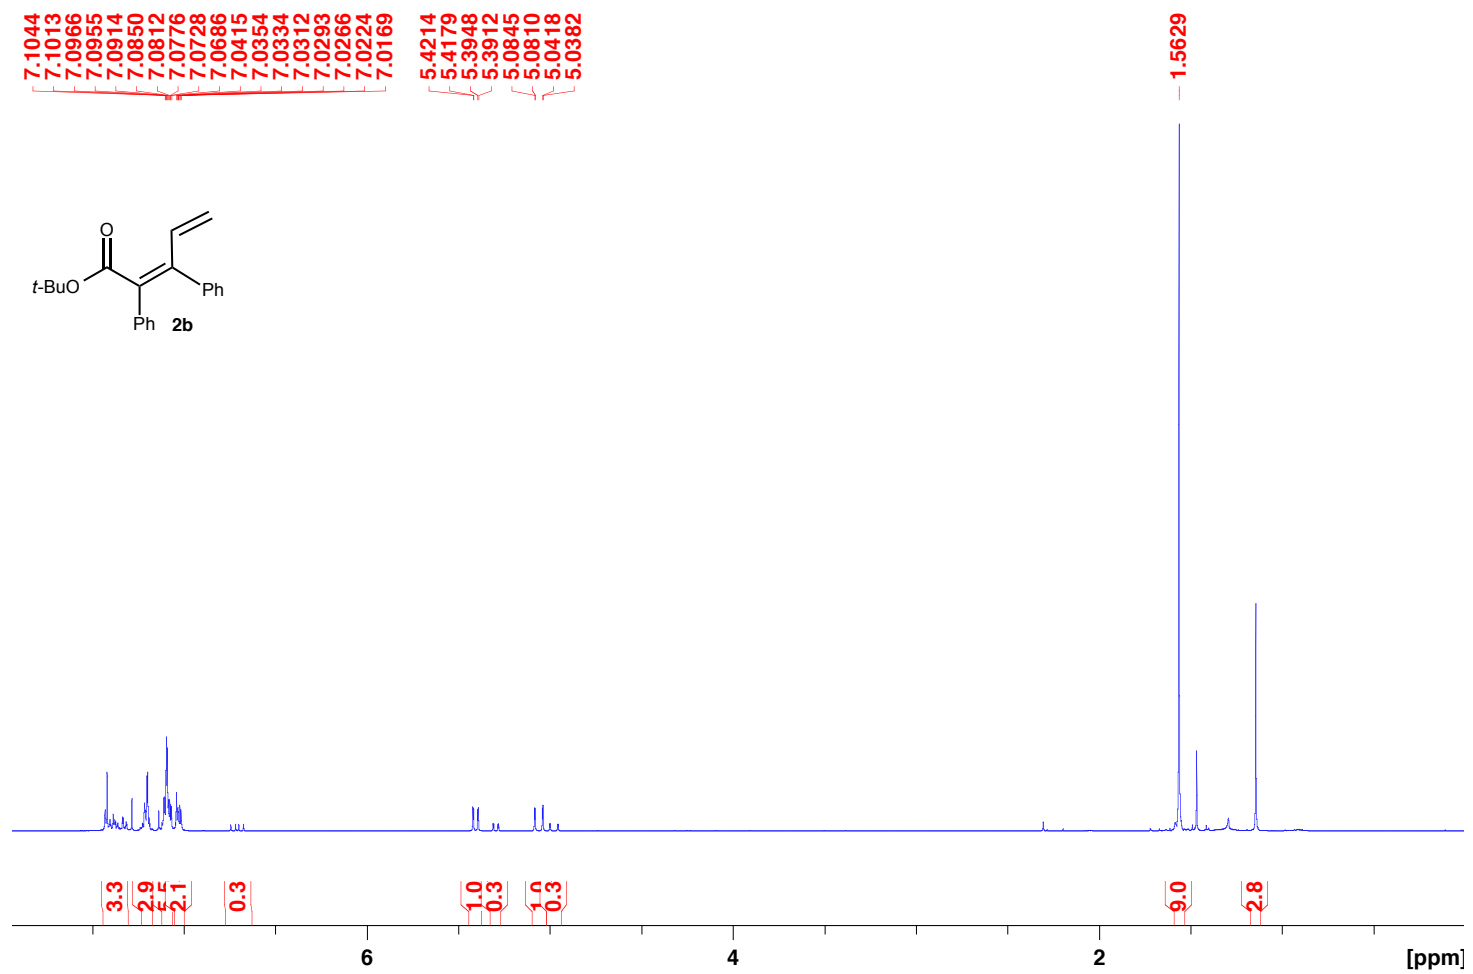

$^{13}\text{C}\{^1\text{H}\}$  NMR (100 MHz),  $\text{CDCl}_3$ , as an inseparable 3:1 *E*:*Z* mixture of stereoisomers

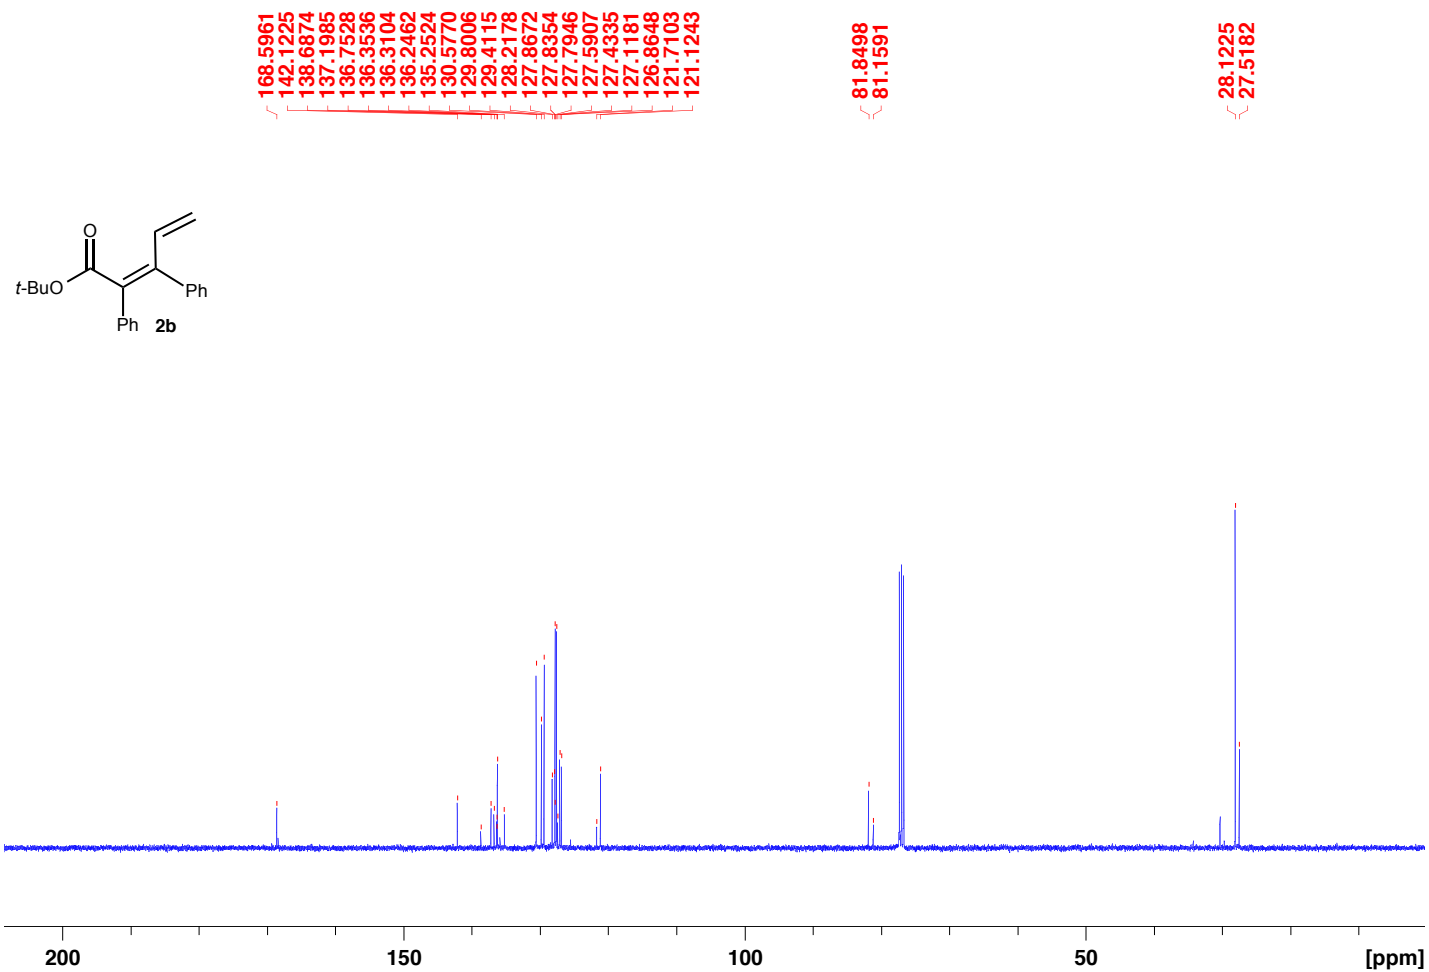

$^1\text{H}$  NMR (400 MHz),  $\text{CDCl}_3$ , as an inseparable 1:5 *E*:*Z* mixture of stereoisomers

7.3842  
7.3673  
7.3487  
7.3231  
7.3056  
7.2784  
7.2751  
7.2581  
6.9428  
6.9152  
6.8991  
6.8716

5.5150  
5.4714  
5.3611  
5.3335

2.2027  
2.1828  
2.1622  
1.4600  
1.2906  
1.2709  
1.2629  
1.2398  
1.2224  
1.2153  
1.2065  
1.1689  
0.8647  
0.8474  
0.8295

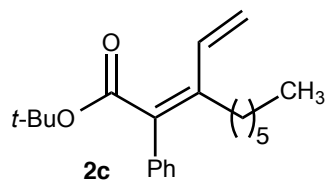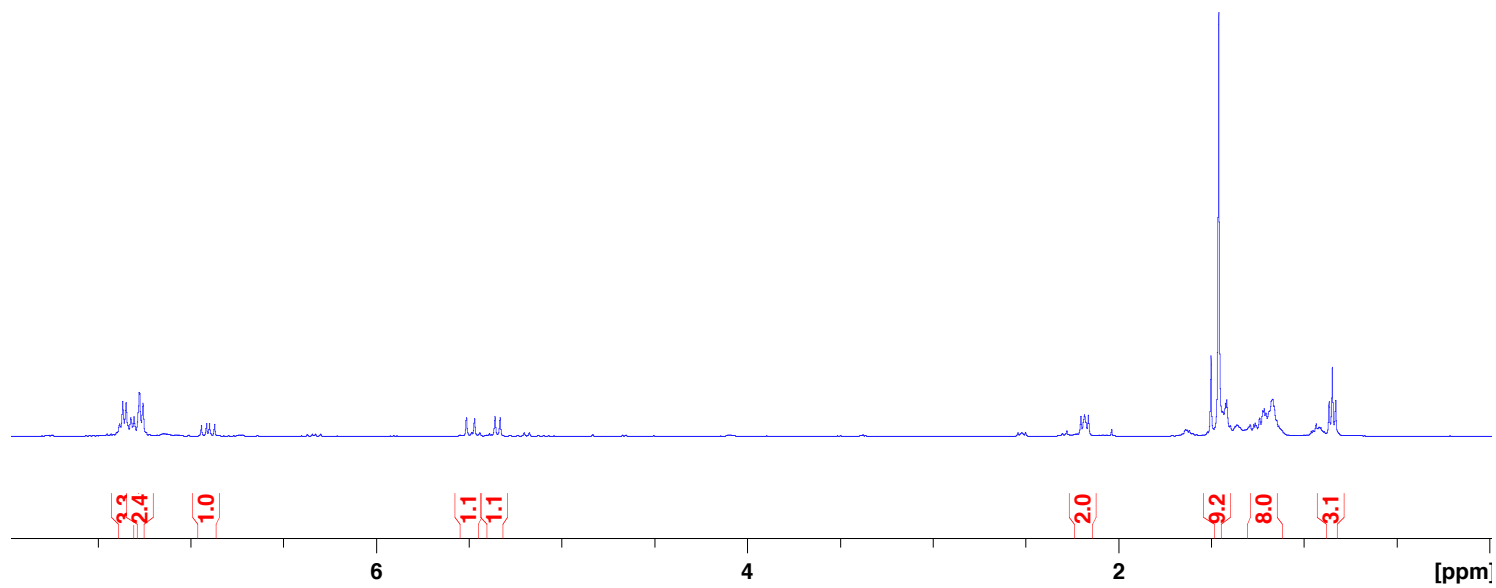

$^{13}\text{C}\{^1\text{H}\}$  NMR (100 MHz),  $\text{CDCl}_3$ , as an inseparable 1:5 *E*:*Z* mixture of stereoisomers

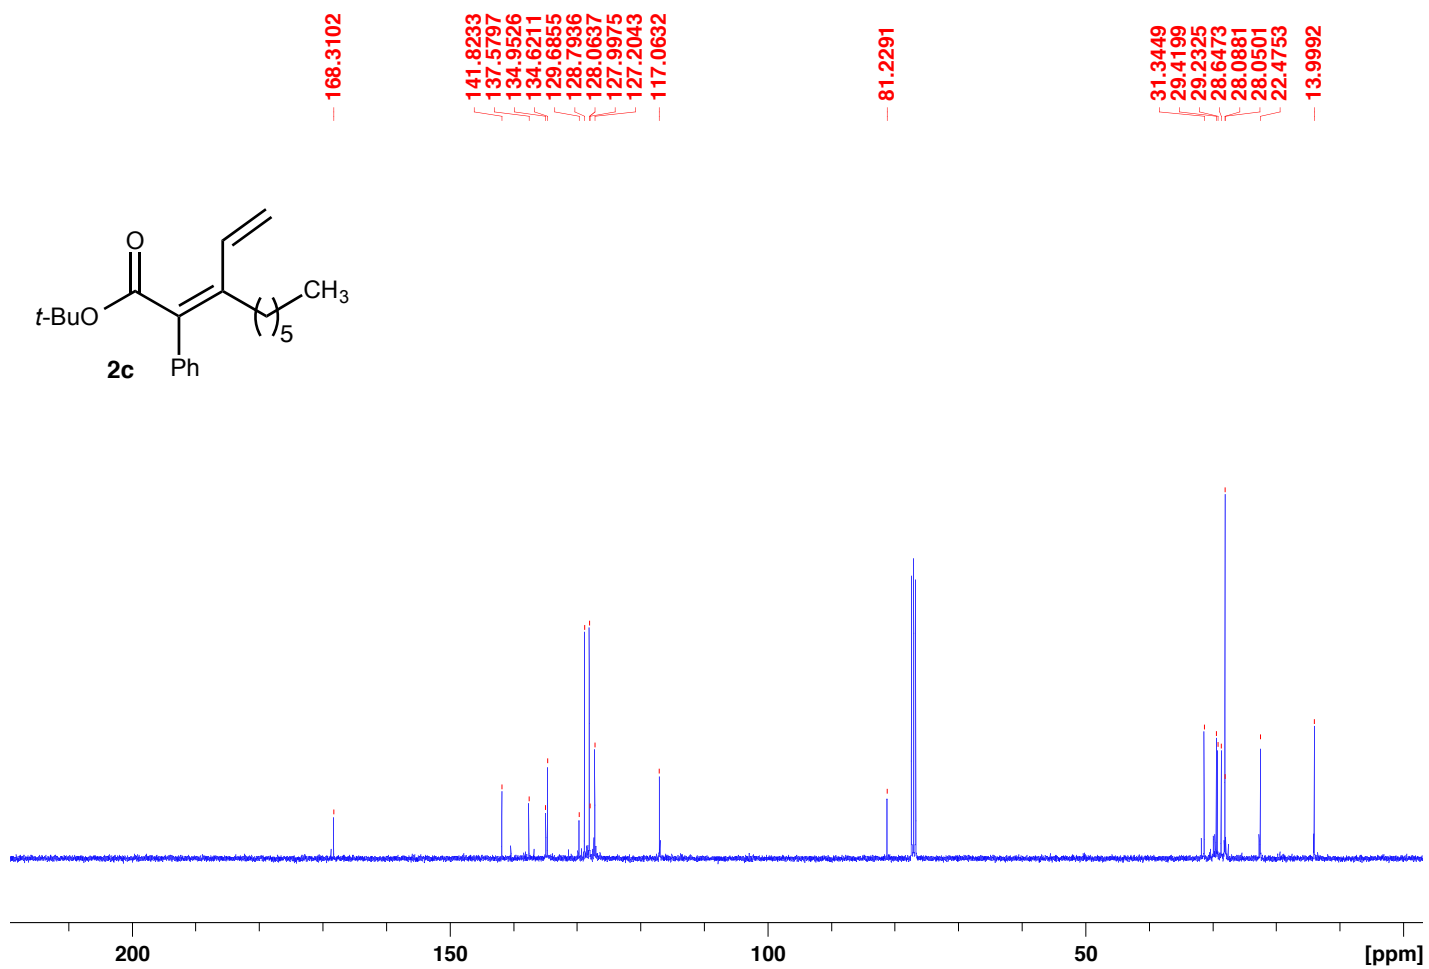

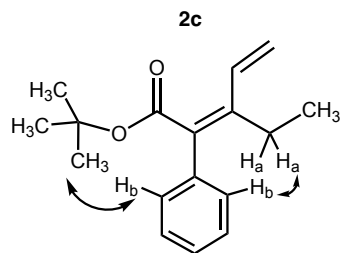

NOESY

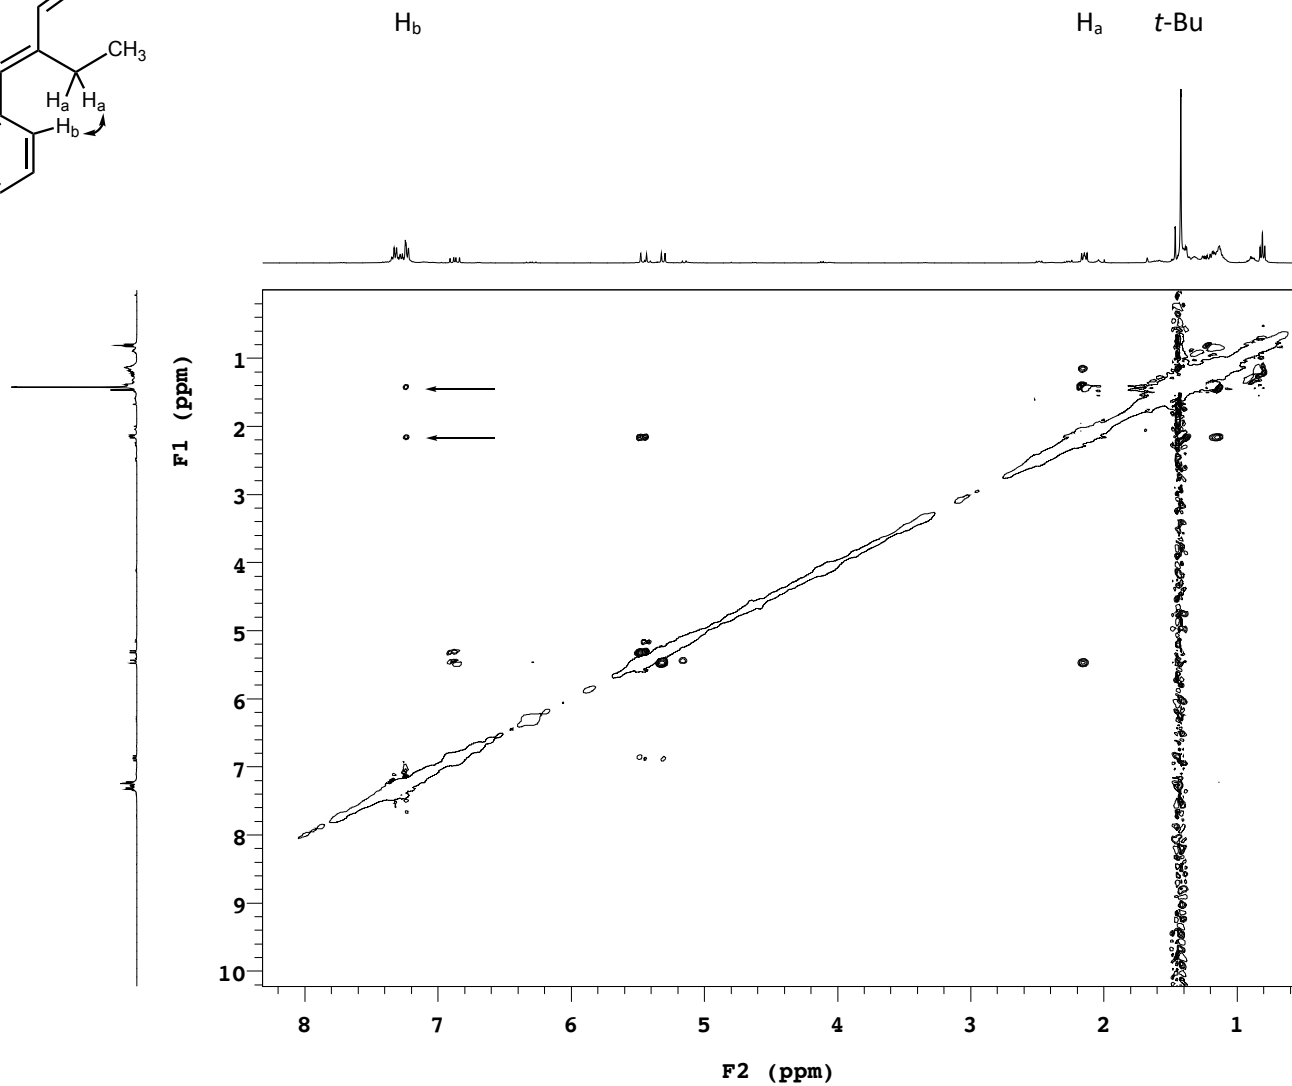

$^1\text{H}$  NMR (400 MHz),  $\text{CDCl}_3$ , as a >10:1 mixture of *E* and *Z* stereoisomers

7.3460  
7.3229  
7.3191  
7.3090  
7.3049  
7.2885  
7.2837  
7.2789  
7.2662  
7.2623  
7.2589  
6.4963  
6.4680  
6.4525  
6.4242

5.4212  
5.4161  
5.3774  
5.3723  
5.2821  
5.2772  
5.2538  
5.2489

2.2966  
2.2747  
2.2664  
2.2581  
2.2362  
1.6853  
1.6668  
1.6043  
1.6009  
1.5975  
1.5756  
1.5726  
1.4159  
1.4045  
1.3924  
1.3850  
1.3742  
1.3709  
1.3663  
1.3621  
1.3537  
1.3239  
1.0960  
1.0769

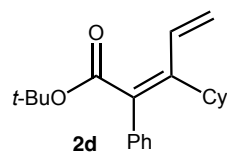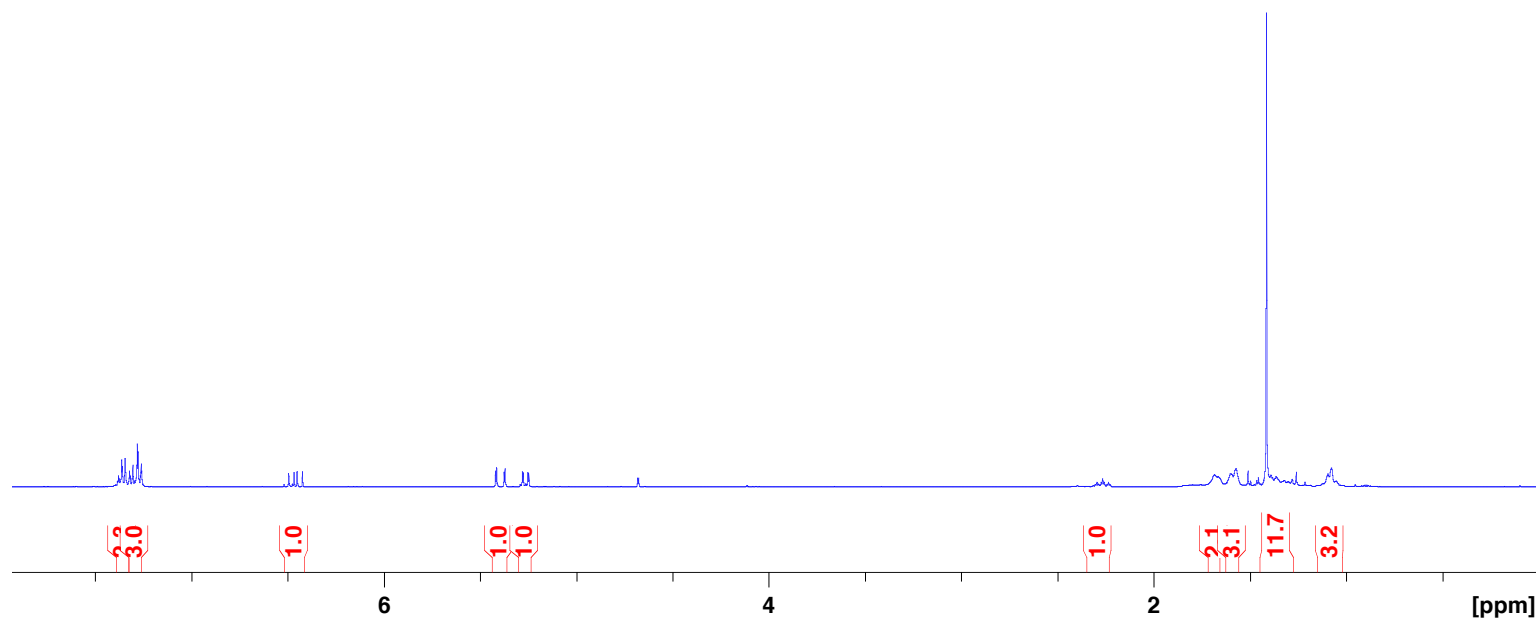



$^{13}\text{C}\{^1\text{H}\}$  NMR (100 MHz),  $\text{CDCl}_3$ , as a >10:1 mixture of *E* and *Z* stereoisomers

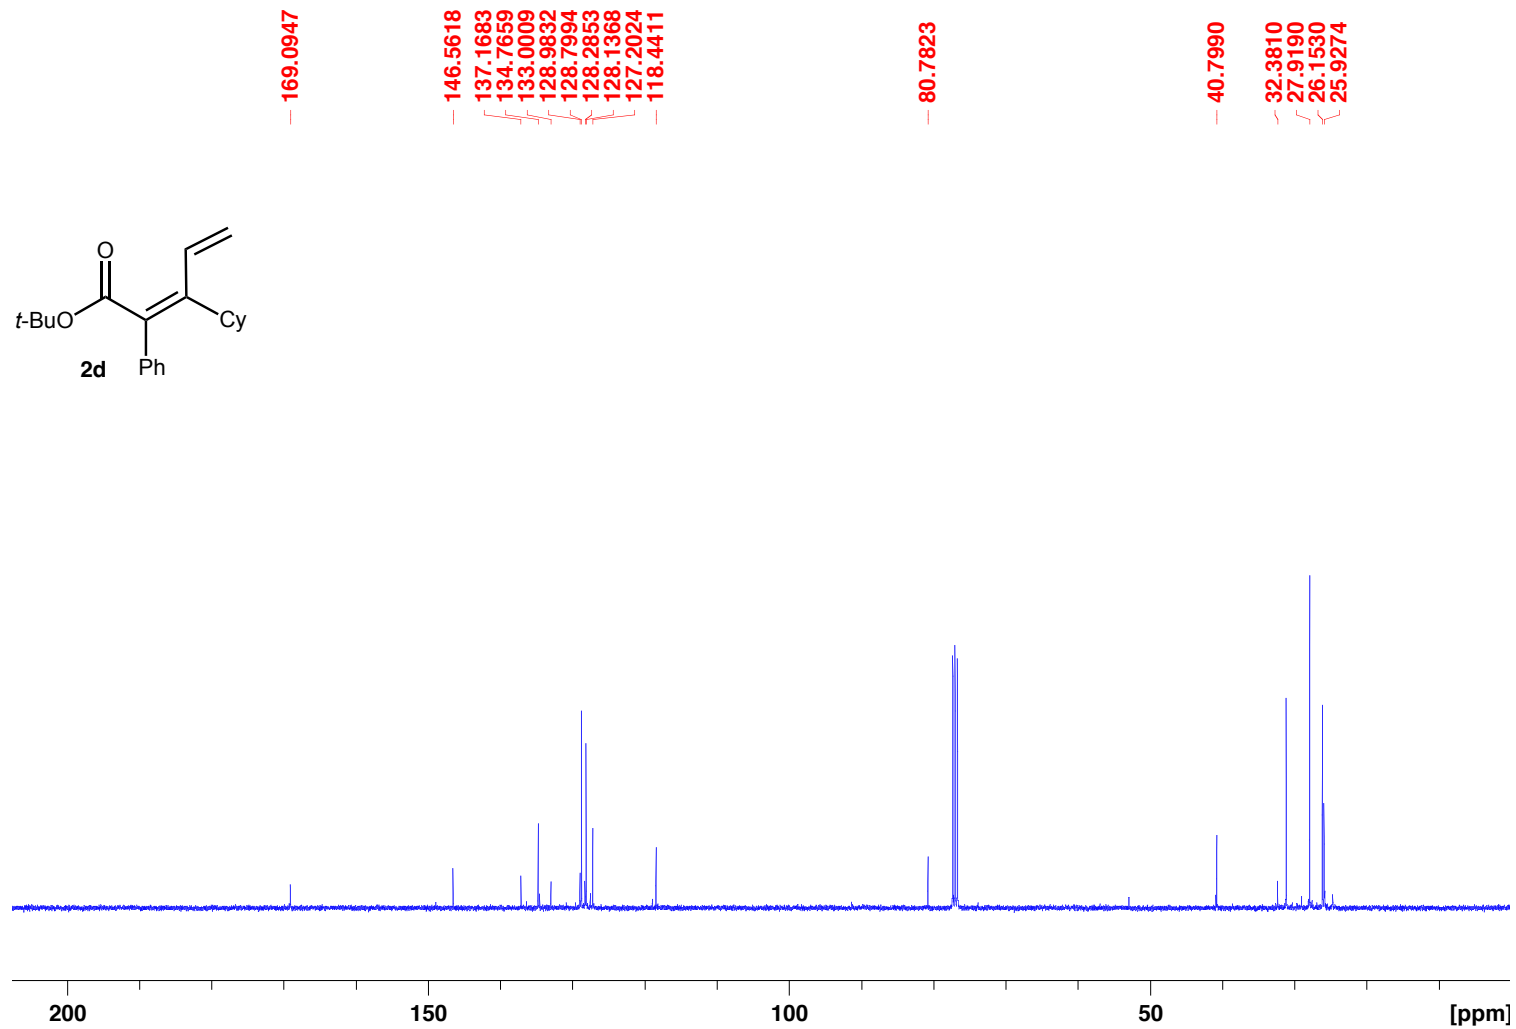

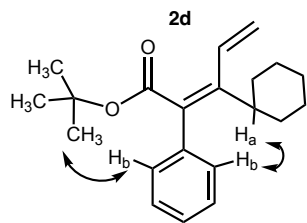

NOESY

H<sub>b</sub>

H<sub>a</sub>

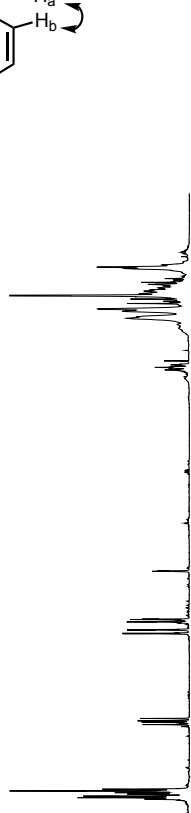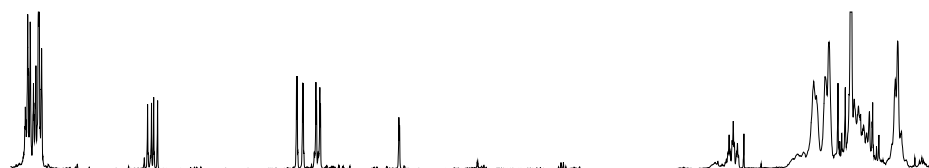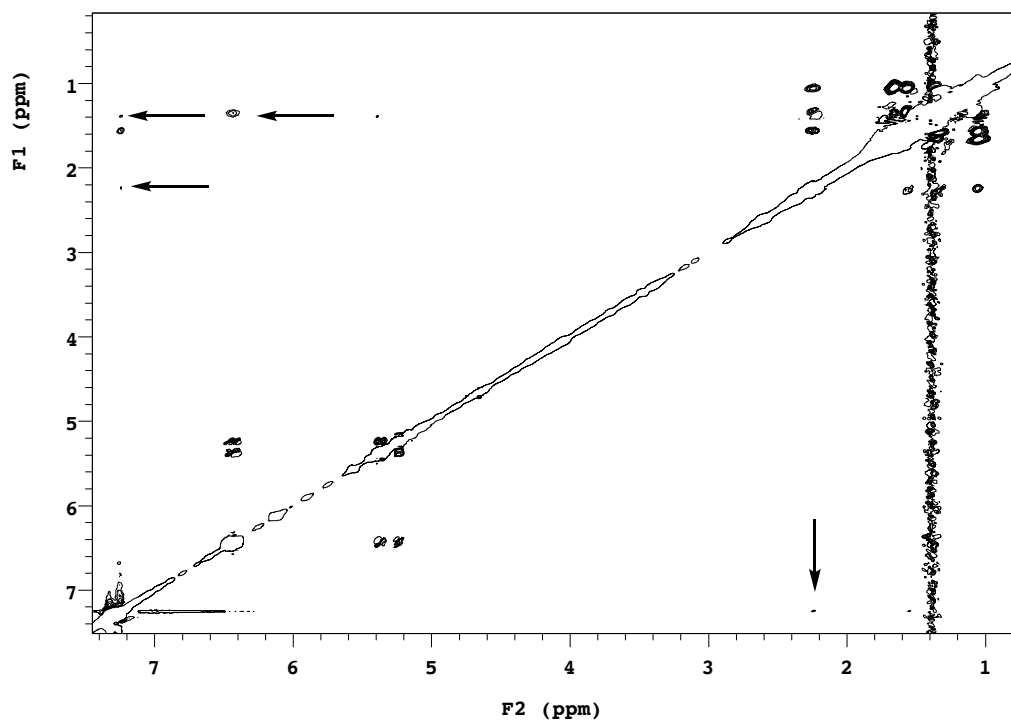

$^1\text{H}$  NMR (400 MHz) ,  $\text{CDCl}_3$ , as a 9:1 mixture of *E* and *Z* stereoisomers

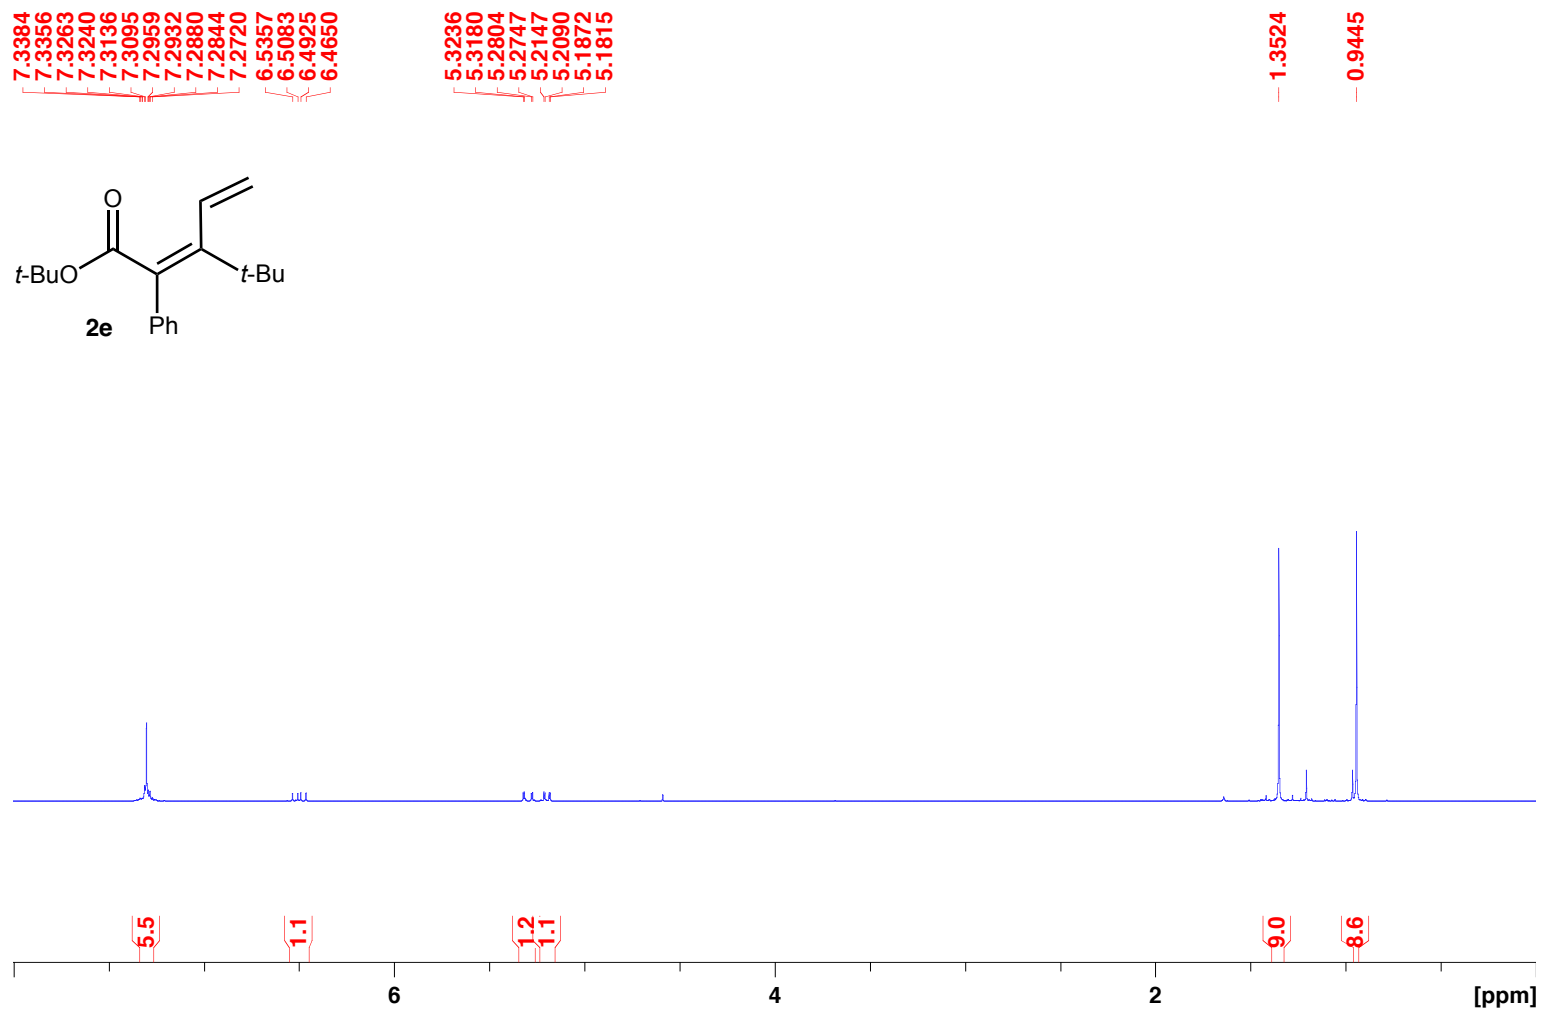

$^{13}\text{C}\{^1\text{H}\}$  NMR (100 MHz),  $\text{CDCl}_3$  as a 9:1 mixture of *E* and *Z* stereoisomers

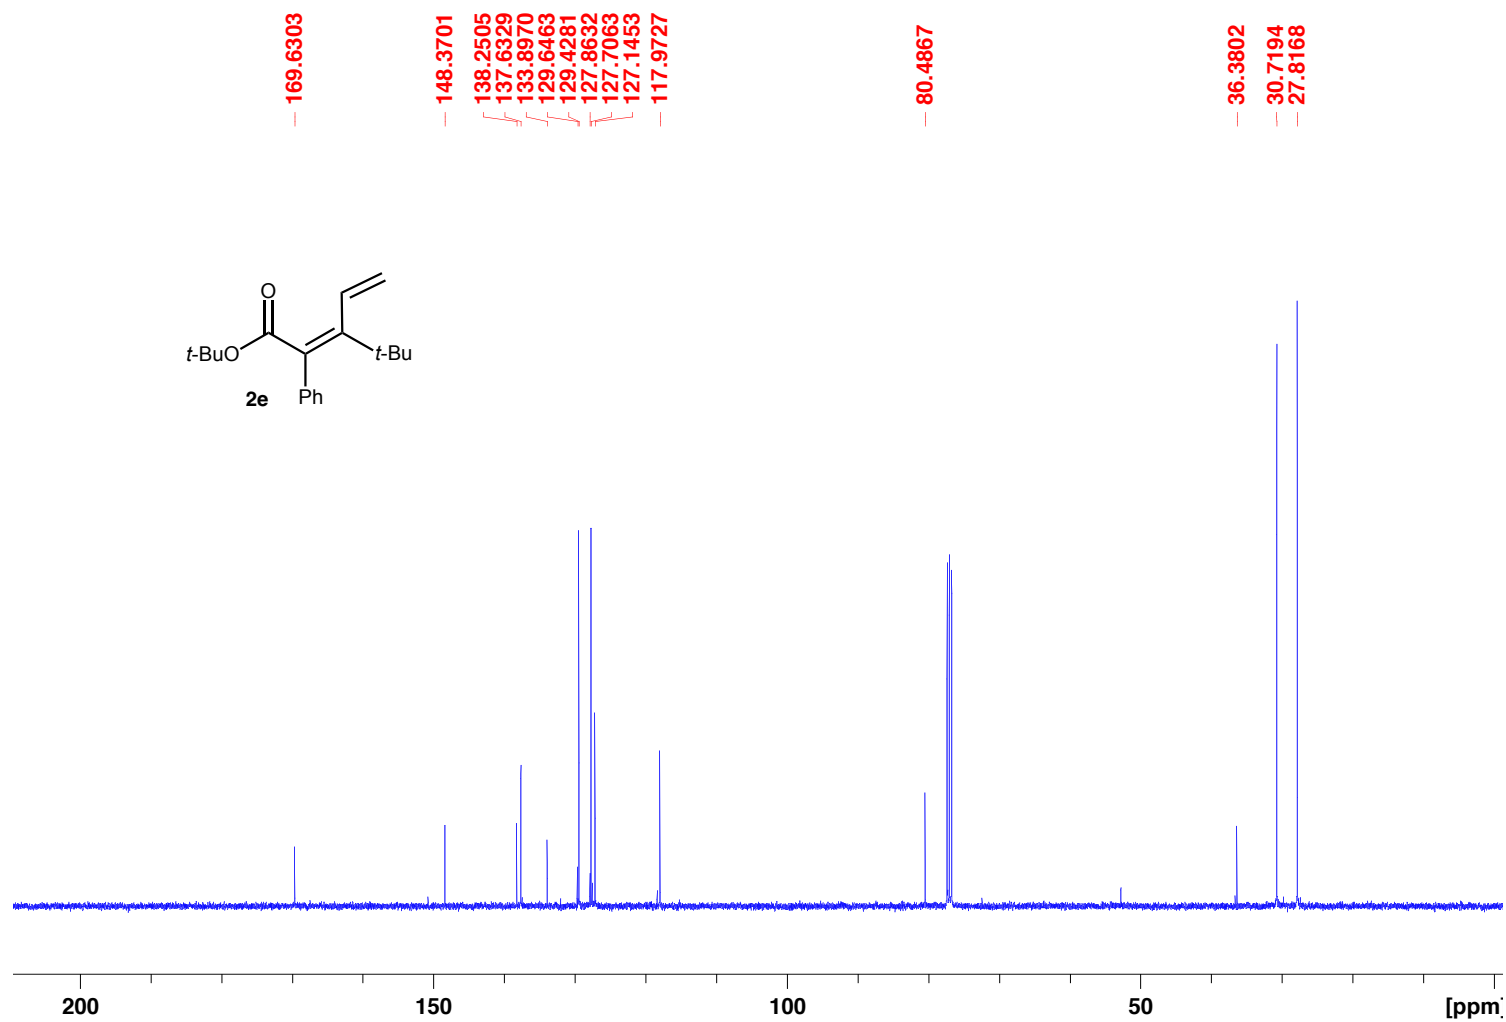

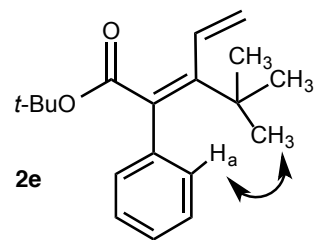

NOESY

H<sub>a</sub>

*t*-Bu

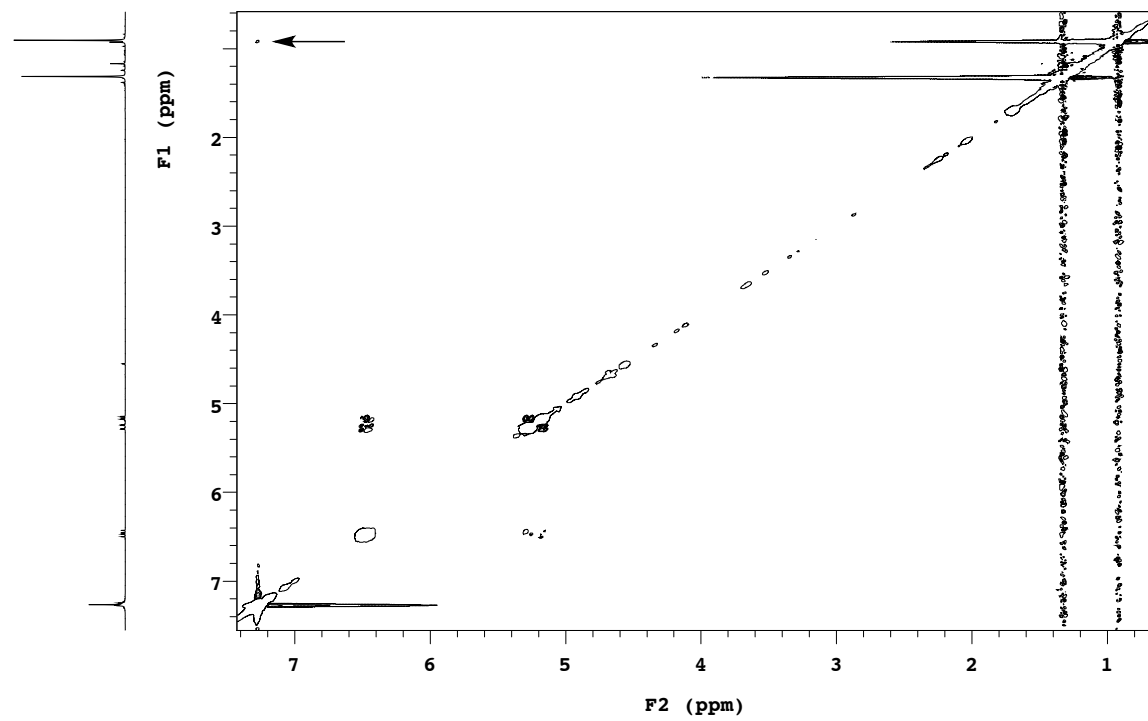

$^1\text{H}$  NMR (400 MHz),  $\text{CDCl}_3$ , as an inseparable 4:1 *E*:*Z* mixture of stereoisomers at the  $\alpha,\beta$ -alkene

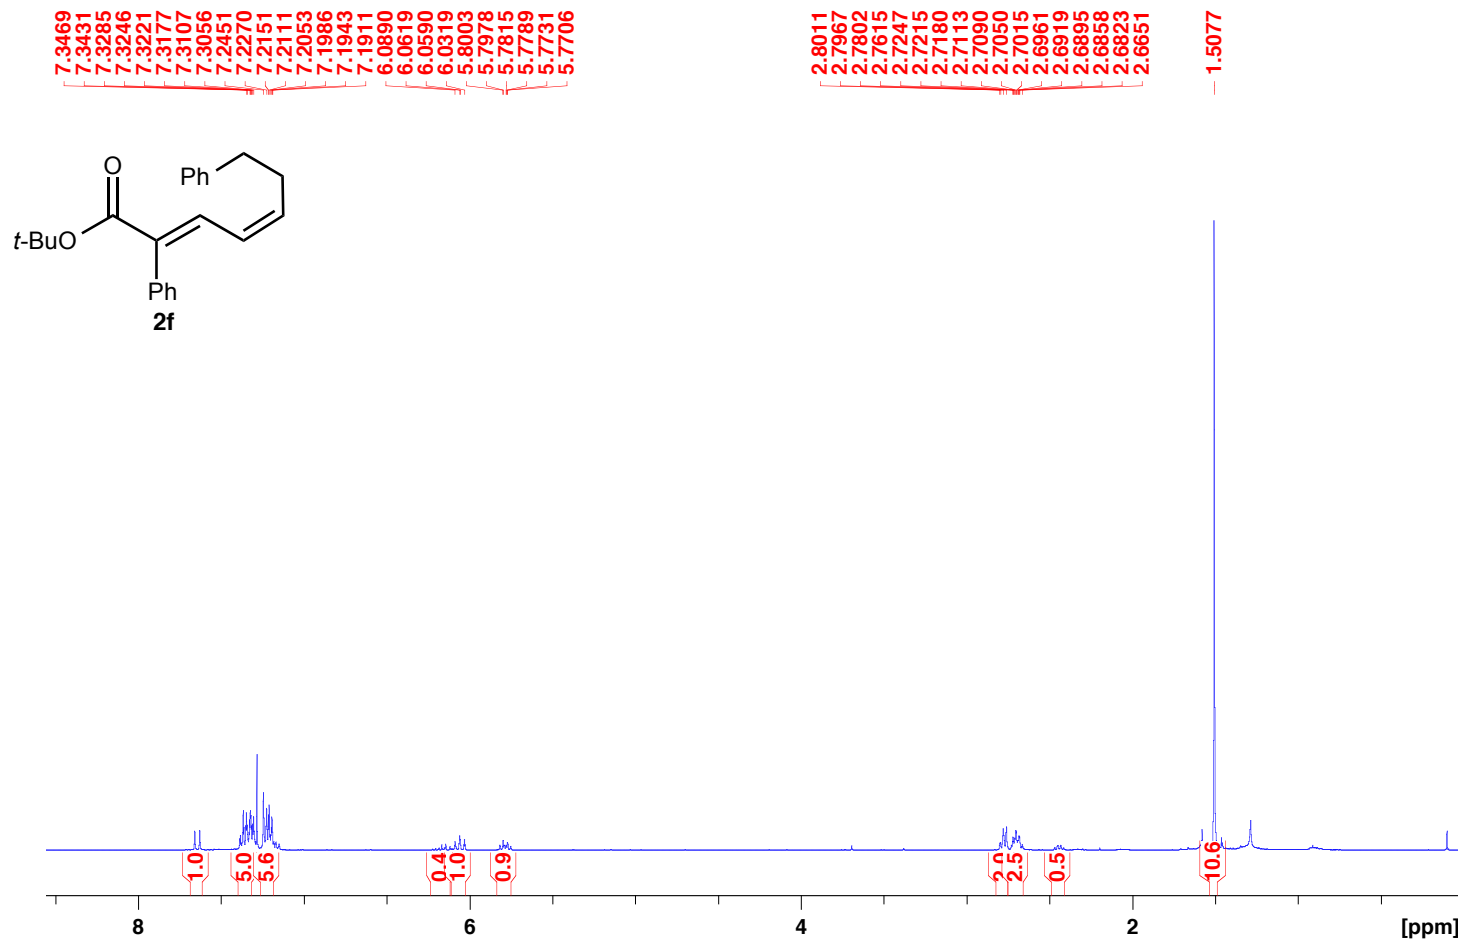

$^{13}\text{C}\{^1\text{H}\}$  NMR (100 MHz),  $\text{CDCl}_3$ , as an inseparable 4:1 *E:Z* mixture of stereoisomers at the  $\alpha,\beta$ -alkene

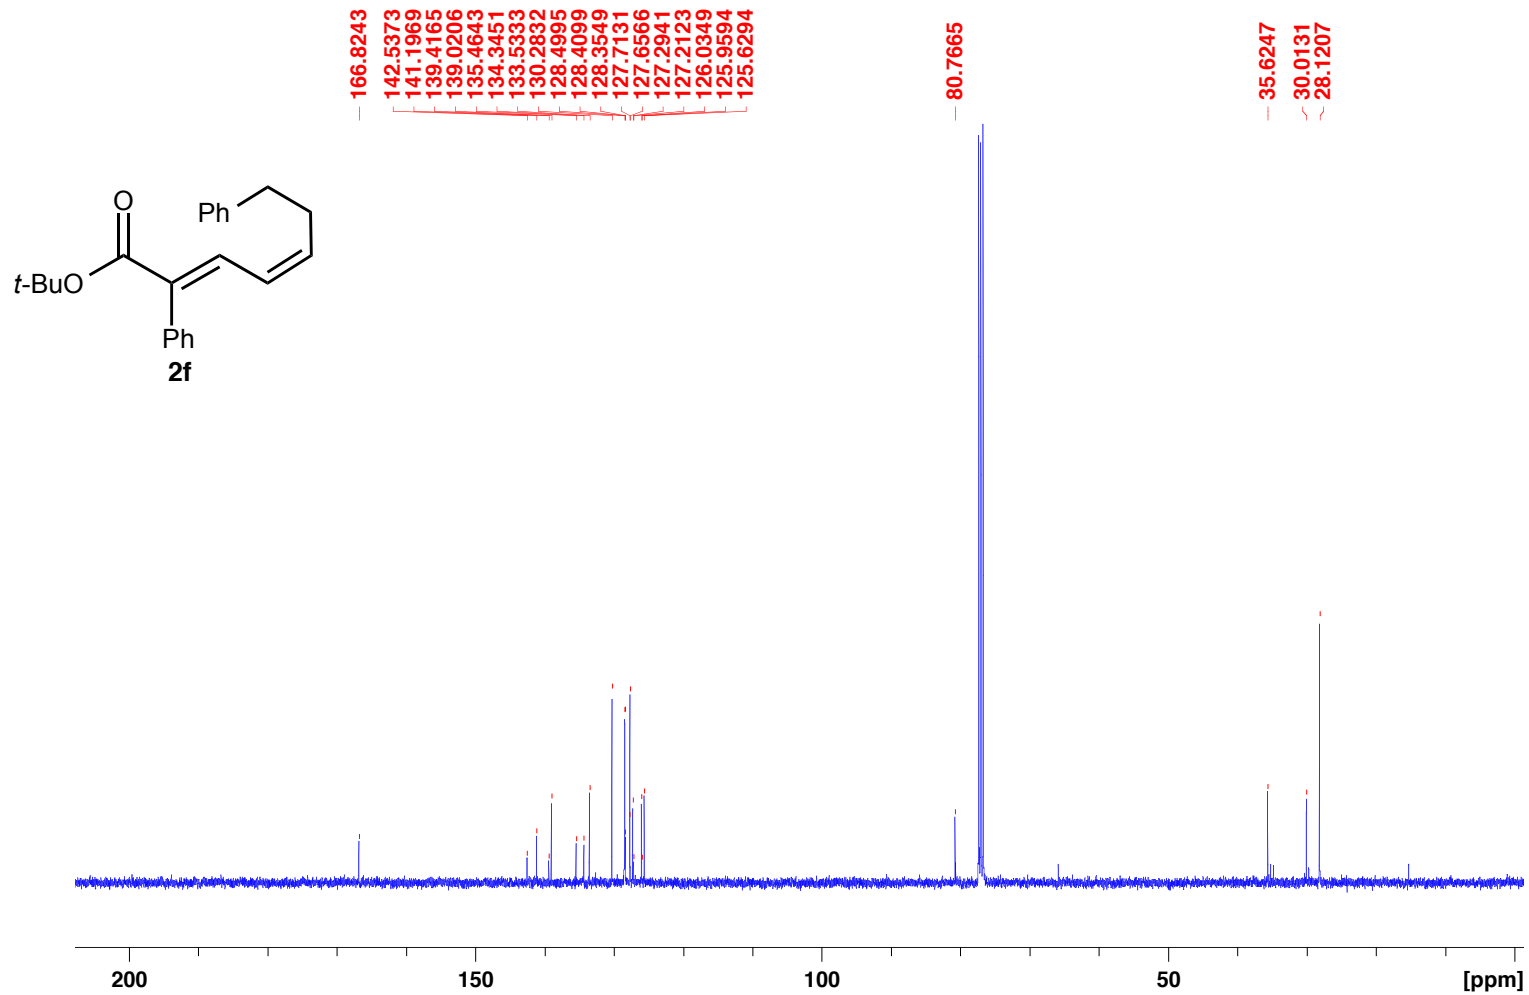

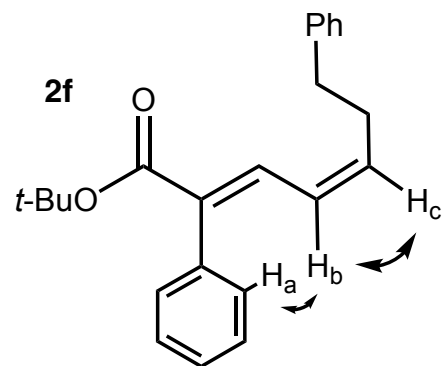

NOESY

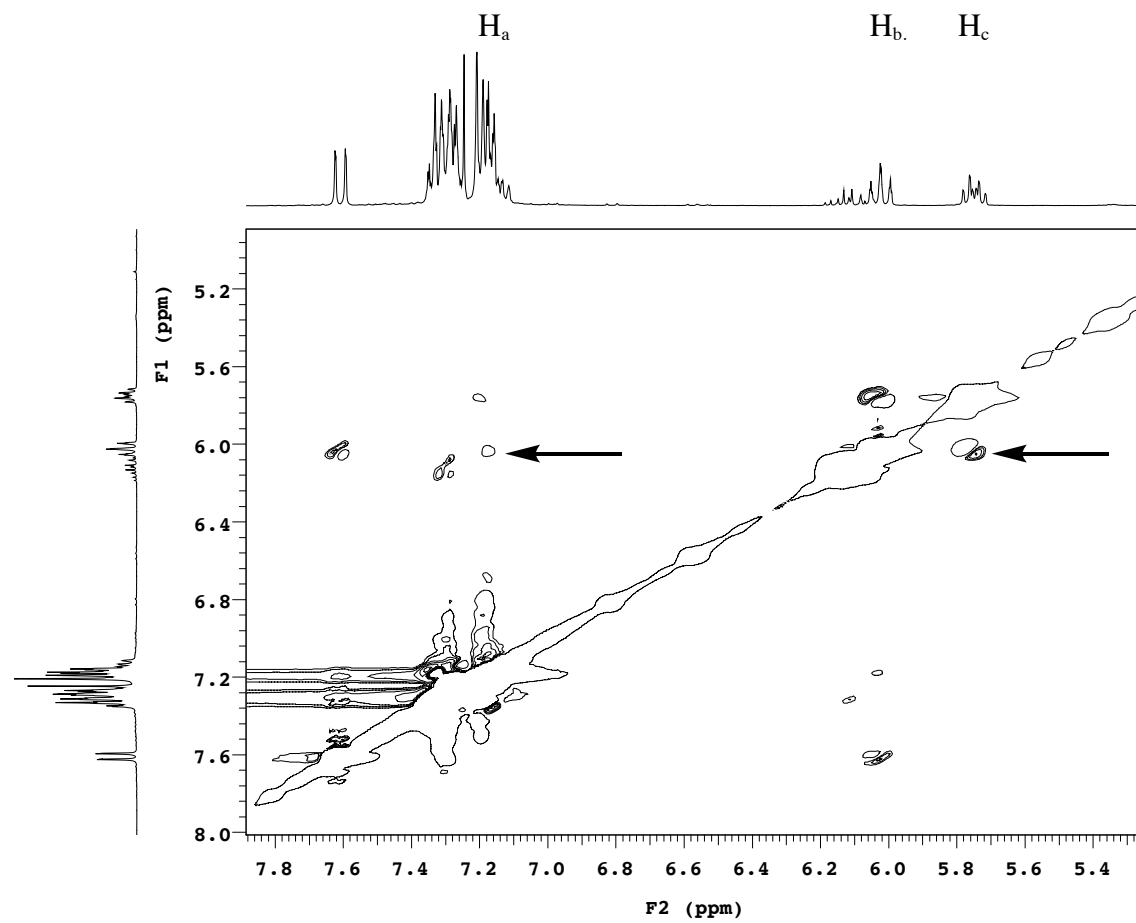



$^1\text{H}$  NMR (400 MHz)  $\text{CDCl}_3$ , as an inseparable 3:1 *E*:*Z* mixture of stereoisomers at the  $\alpha,\beta$ -alkene

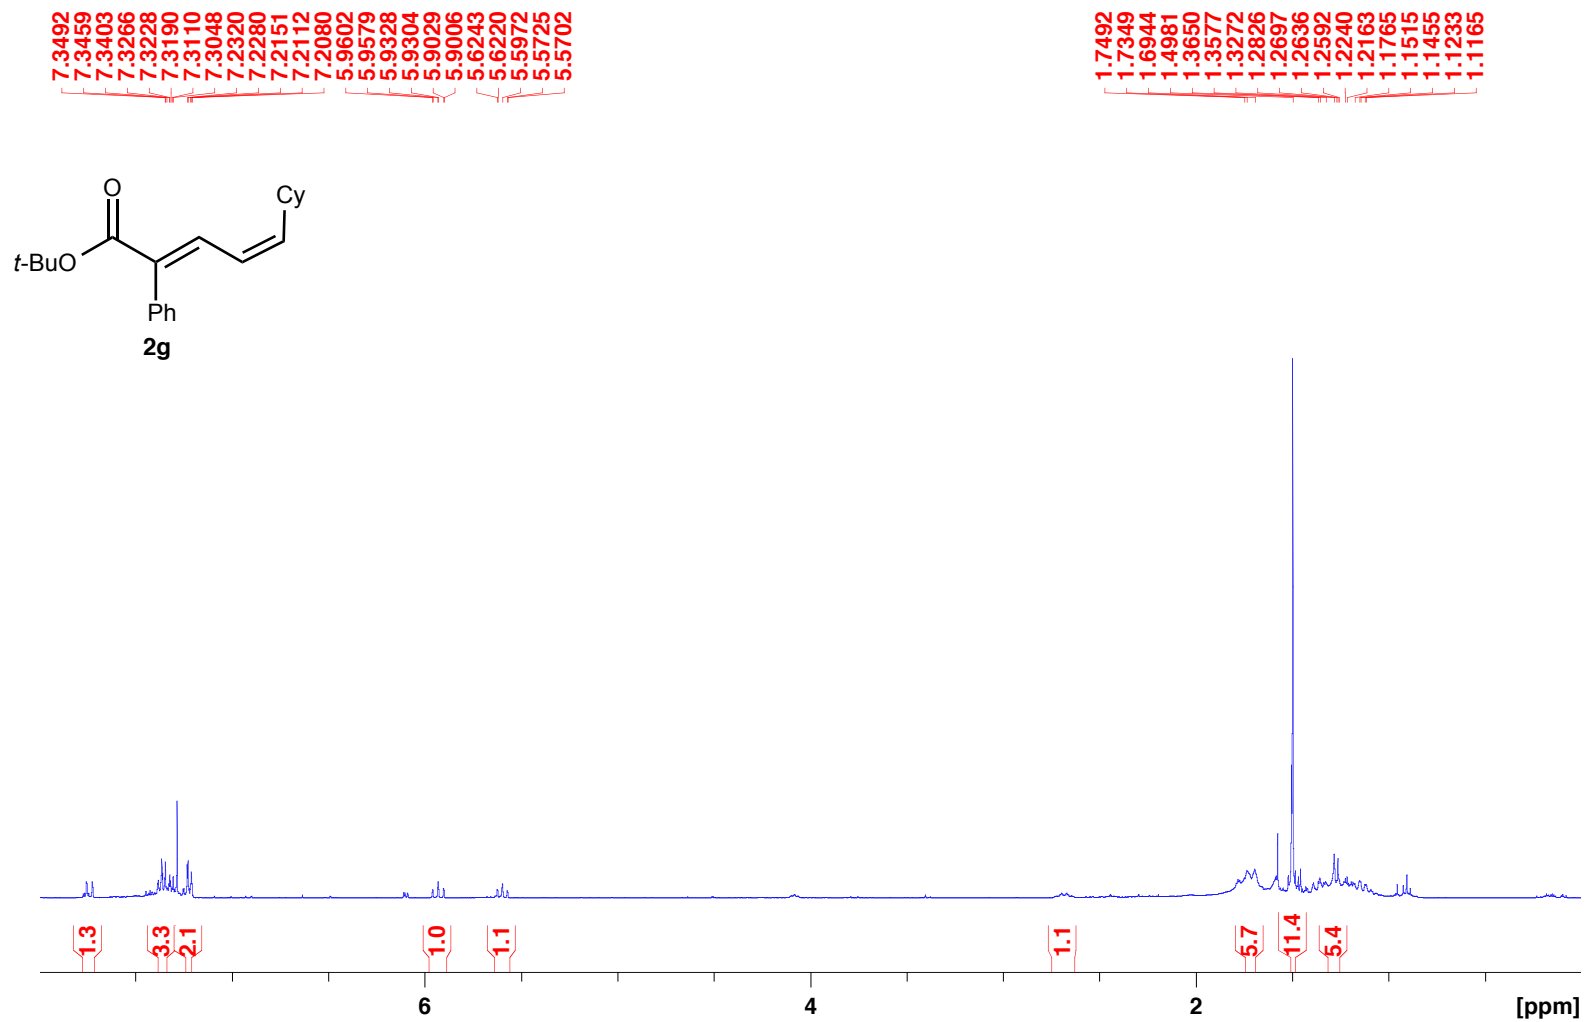

$^{13}\text{C}\{^1\text{H}\}$  NMR (100 MHz),  $\text{CDCl}_3$ , as an inseparable 3:1 *E:Z* mixture of stereoisomers at the  $\alpha,\beta$ -alkene

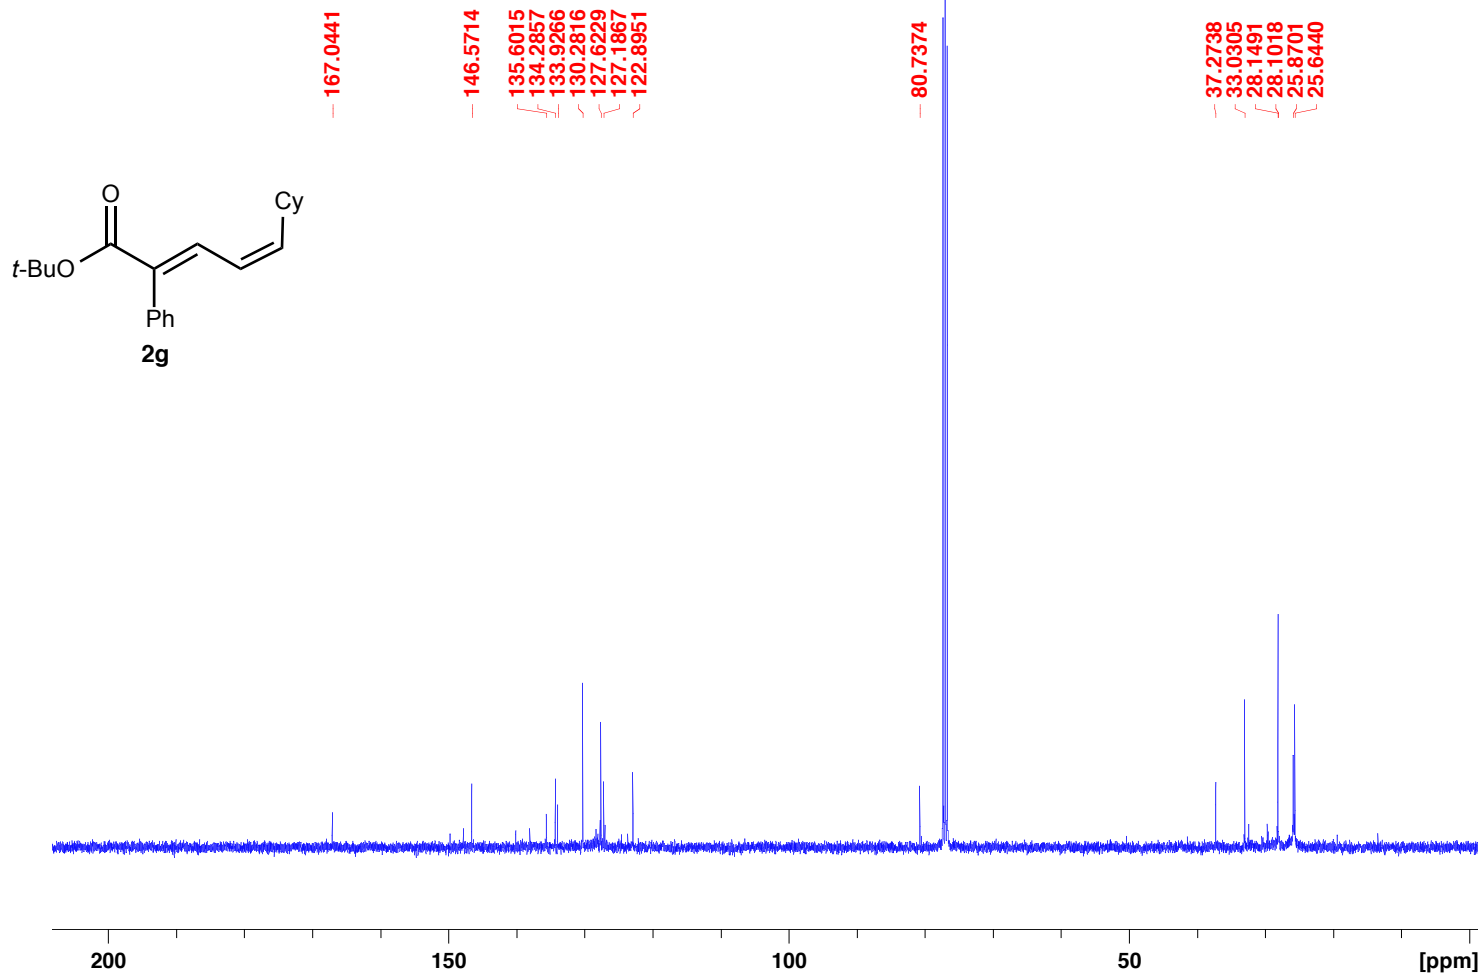

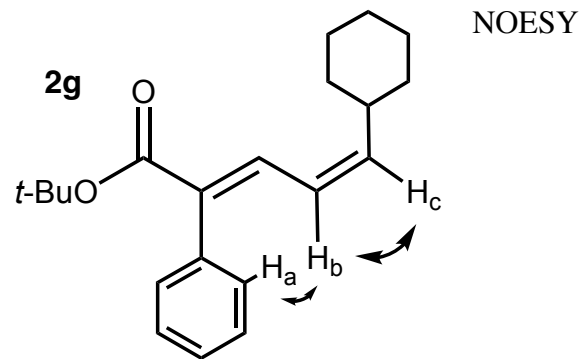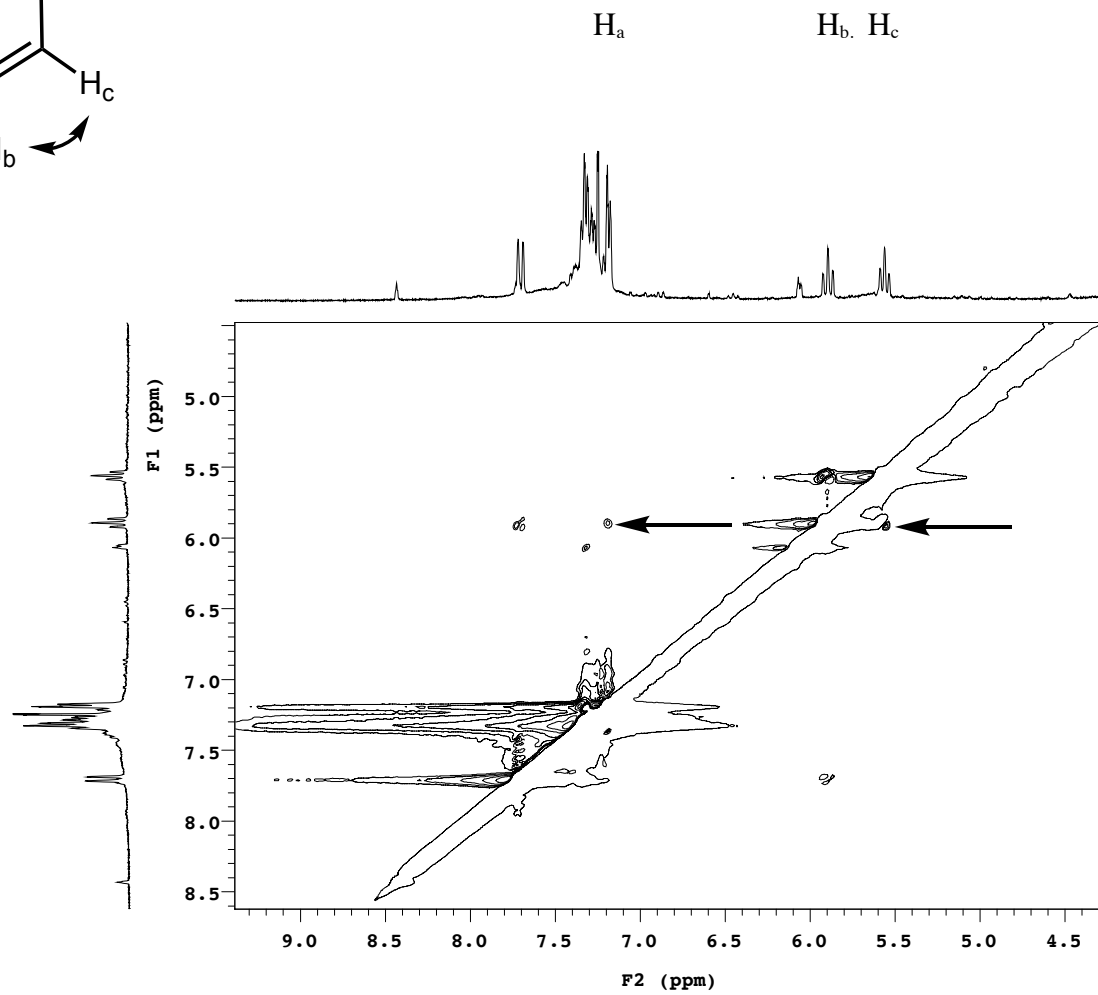

$^1\text{H}$  NMR (400 MHz),  $\text{CDCl}_3$ , as an inseparable 1.4:1 *E:Z* mixture of stereoisomers at the  $\alpha,\beta$ -alkene

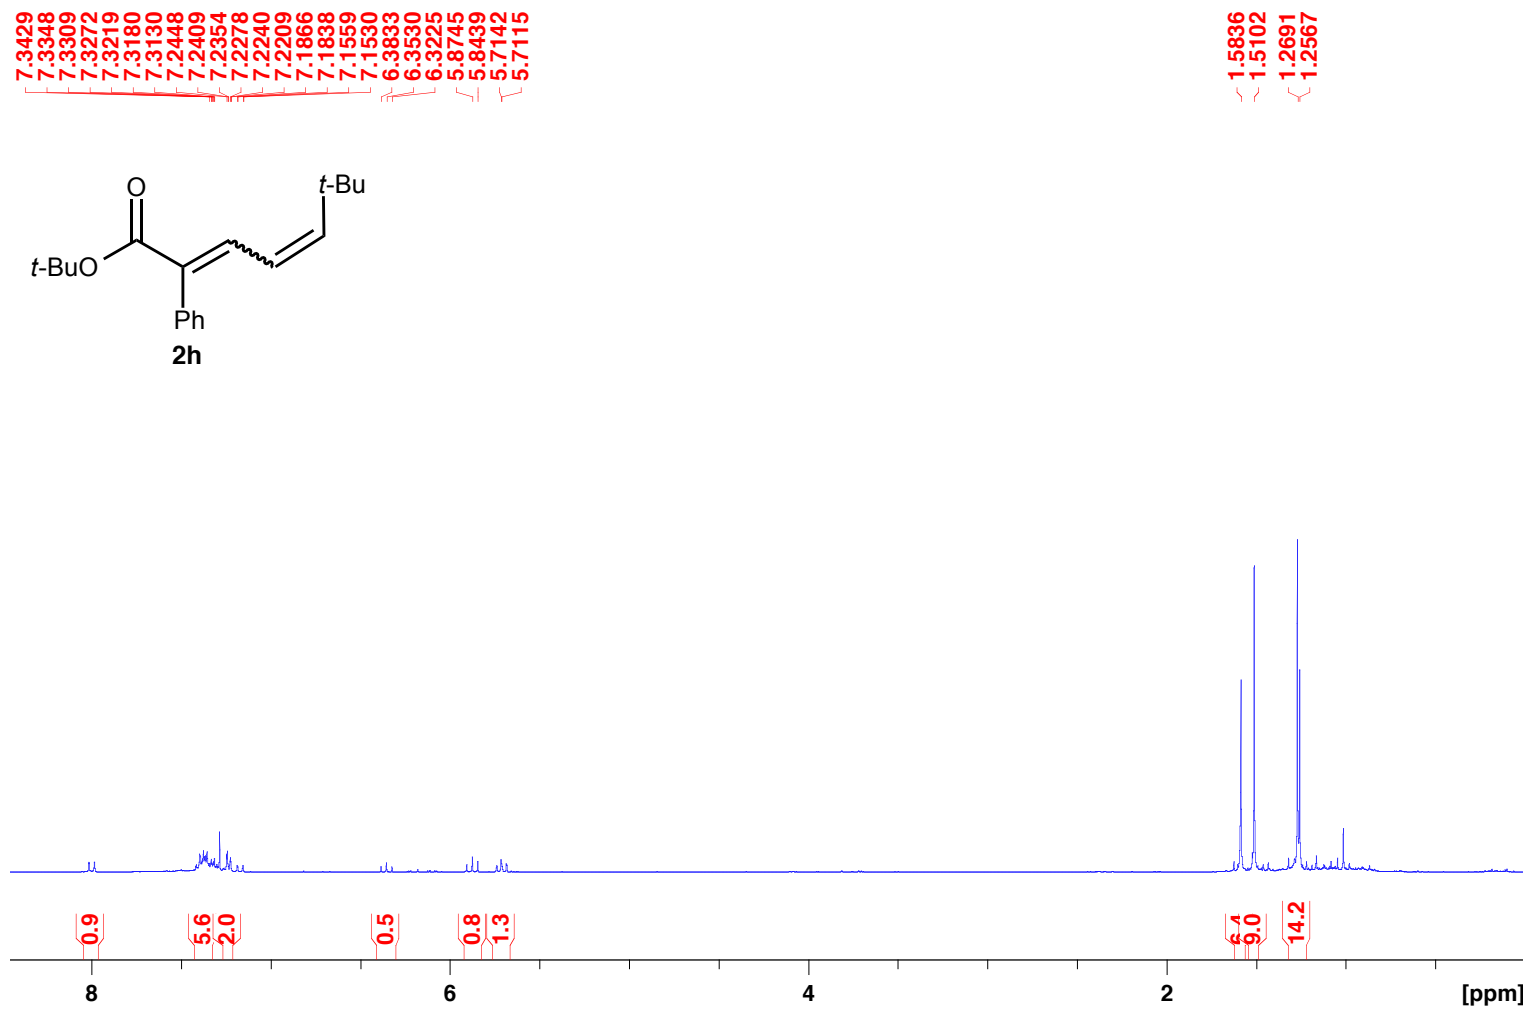

$^{13}\text{C}\{^1\text{H}\}$  NMR (100 MHz),  $\text{CDCl}_3$ , as an inseparable 1.4:1 *E:Z* mixture of stereoisomers at the  $\alpha,\beta$ -alkene

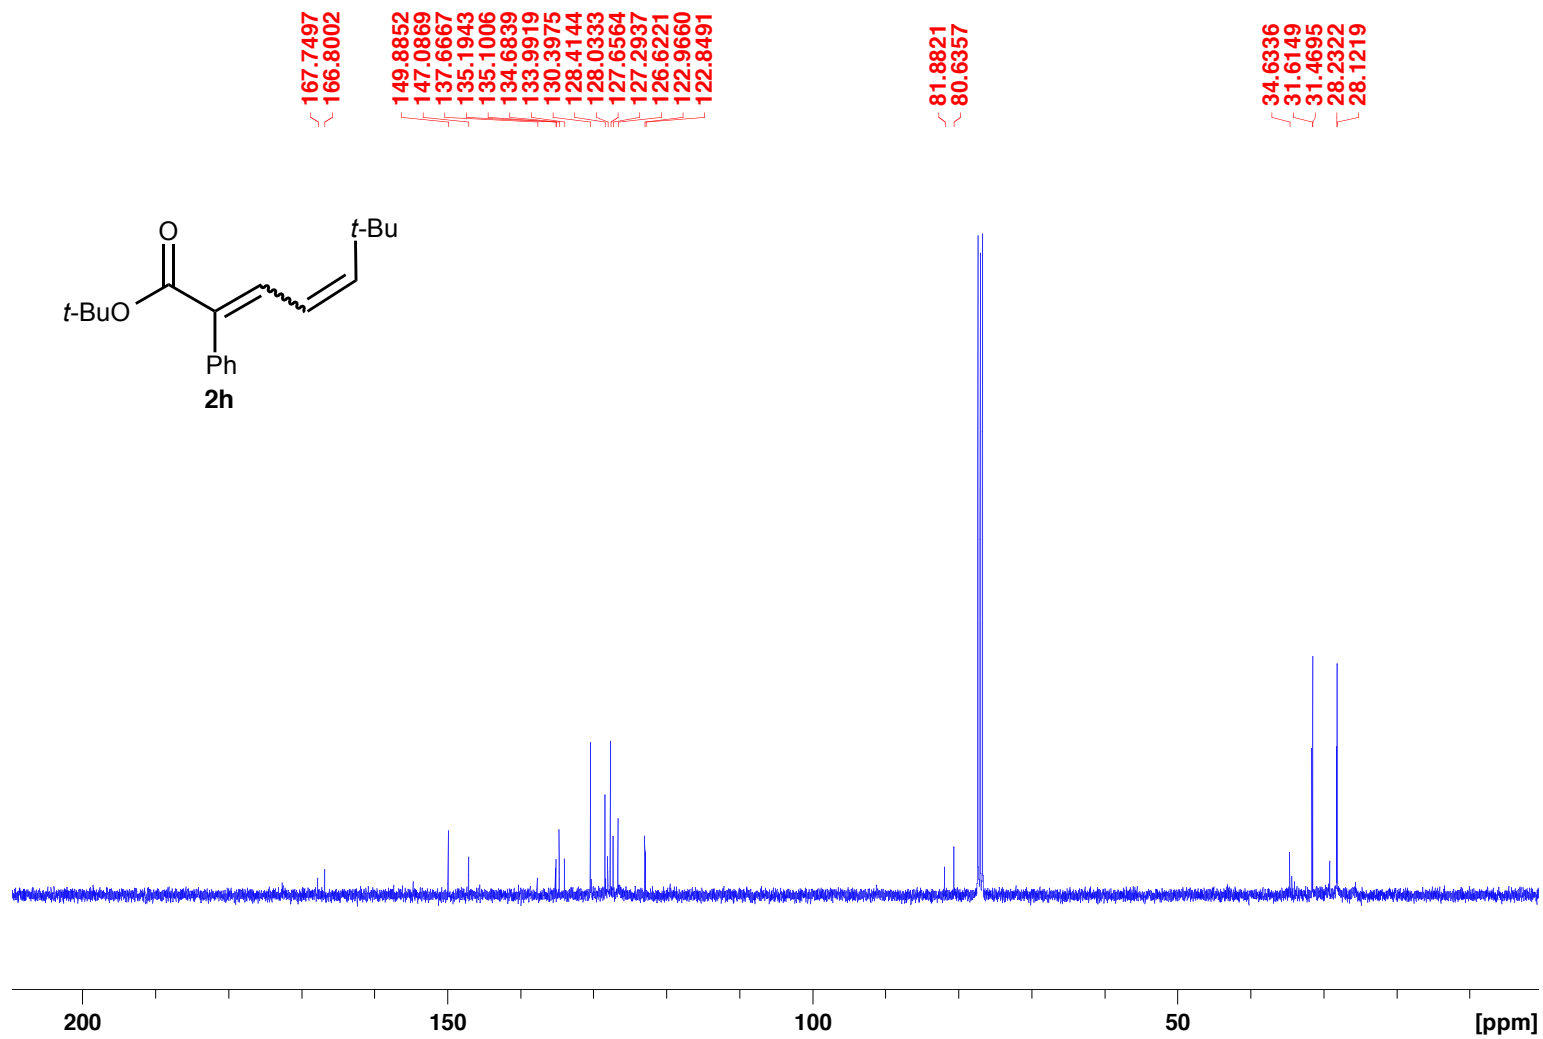

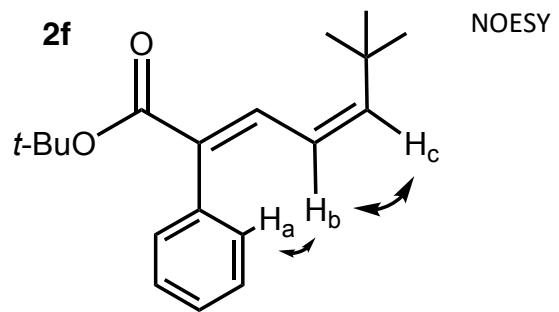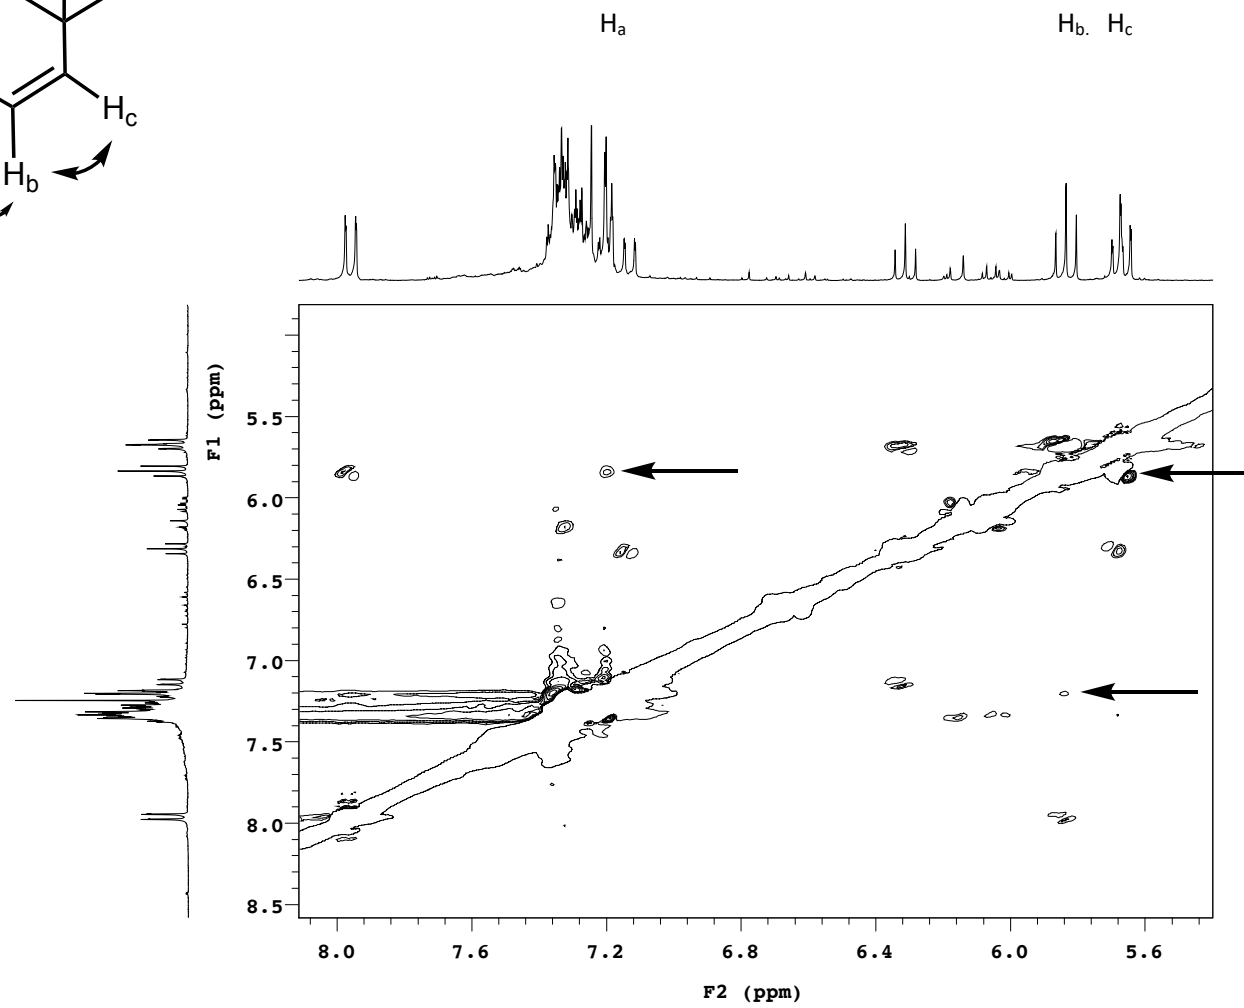

$^1\text{H}$  NMR (400 MHz),  $\text{CDCl}_3$ , as an inseparable 1:3 *E*:*Z* mixture of stereoisomers at the  $\gamma,\delta$ -alkene

7.3067  
7.3044  
7.2939  
7.2917  
7.2757  
7.2113  
7.2048  
7.2020  
7.1950  
7.1848  
7.1834  
7.1818  
6.0745  
6.0457  
5.5825  
5.5775  
5.5731  
5.5686  
5.5638  
5.5249  
5.5067  
5.4961  
5.4886  
5.4779  
2.7467  
2.6844  
2.6659  
2.6455  
2.3797  
2.3759  
2.3412  
2.3375  
2.3225  
2.3189  
2.1257  
2.1166  
2.1107  
2.1036  
2.0856  
2.0799  
2.0650  
2.0556  
1.6971  
1.6928  
1.6824  
1.6779  
1.6622  
1.6540  
1.6488  
1.6392  
1.6348  
1.6261  
1.6202  
1.6135  
1.6048  
1.5843  
1.4469  
1.3102  
1.2864  
1.2601  
1.2544  
1.2475  
0.9188  
0.9020  
0.8842

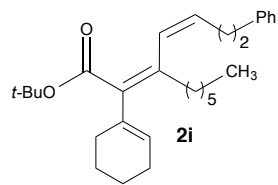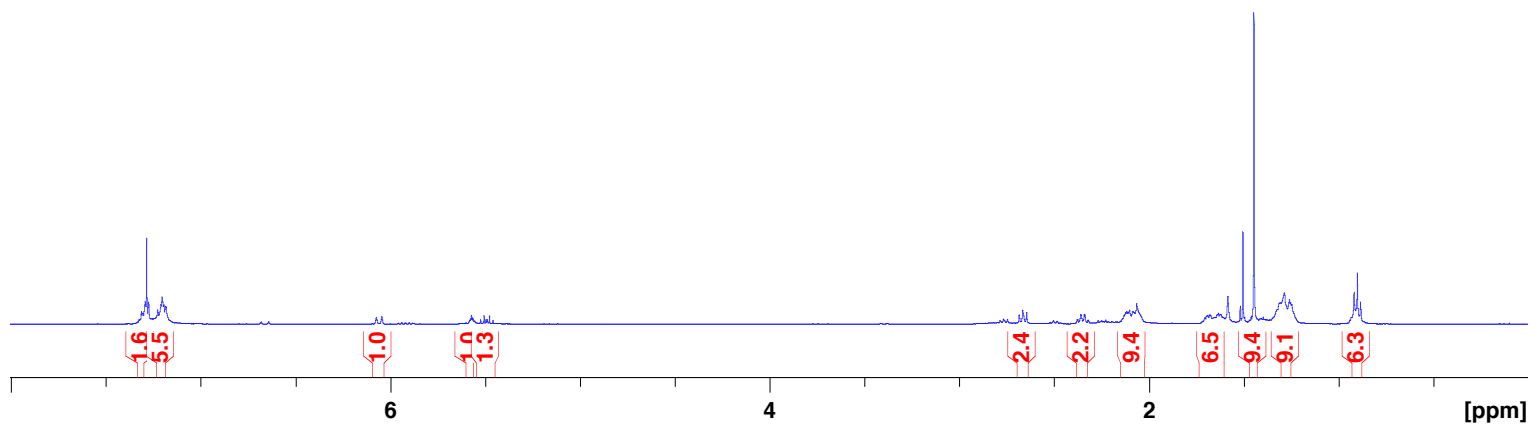

$^{13}\text{C}\{^1\text{H}\}$  NMR (100 MHz),  $\text{CDCl}_3$ , as an inseparable 1:3 *E:Z* mixture of stereoisomers at the  $\gamma,\delta$ -alkene

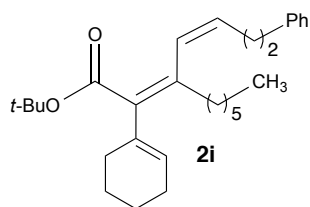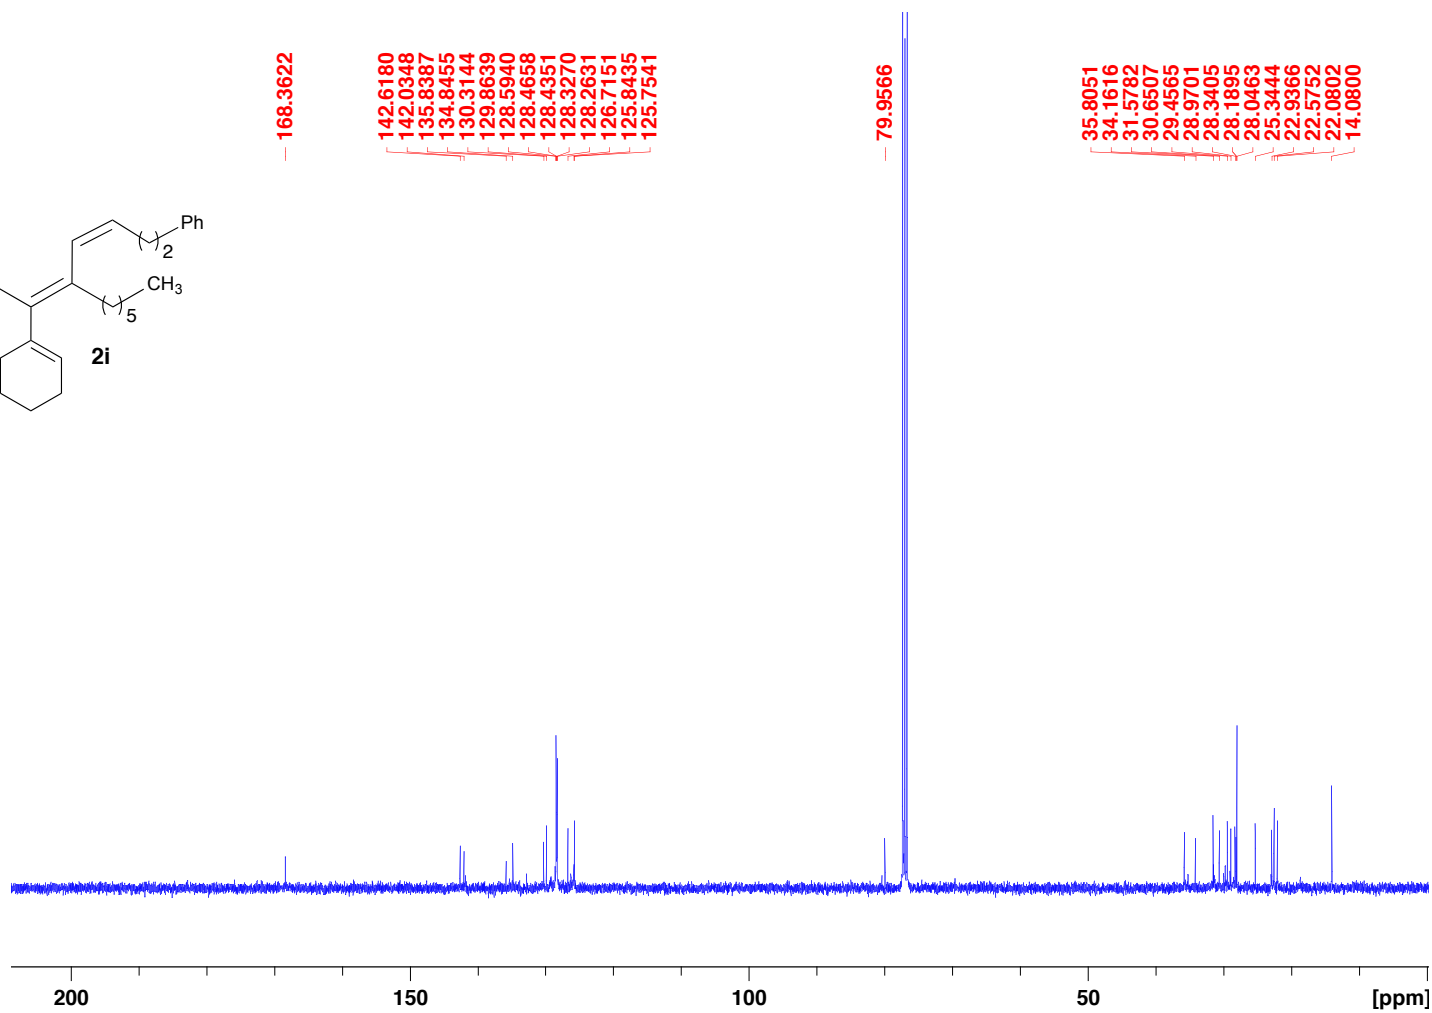



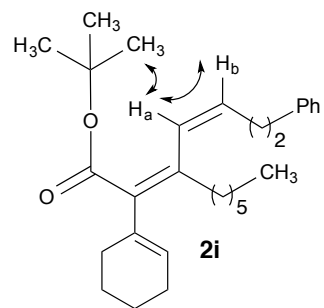

NOESY

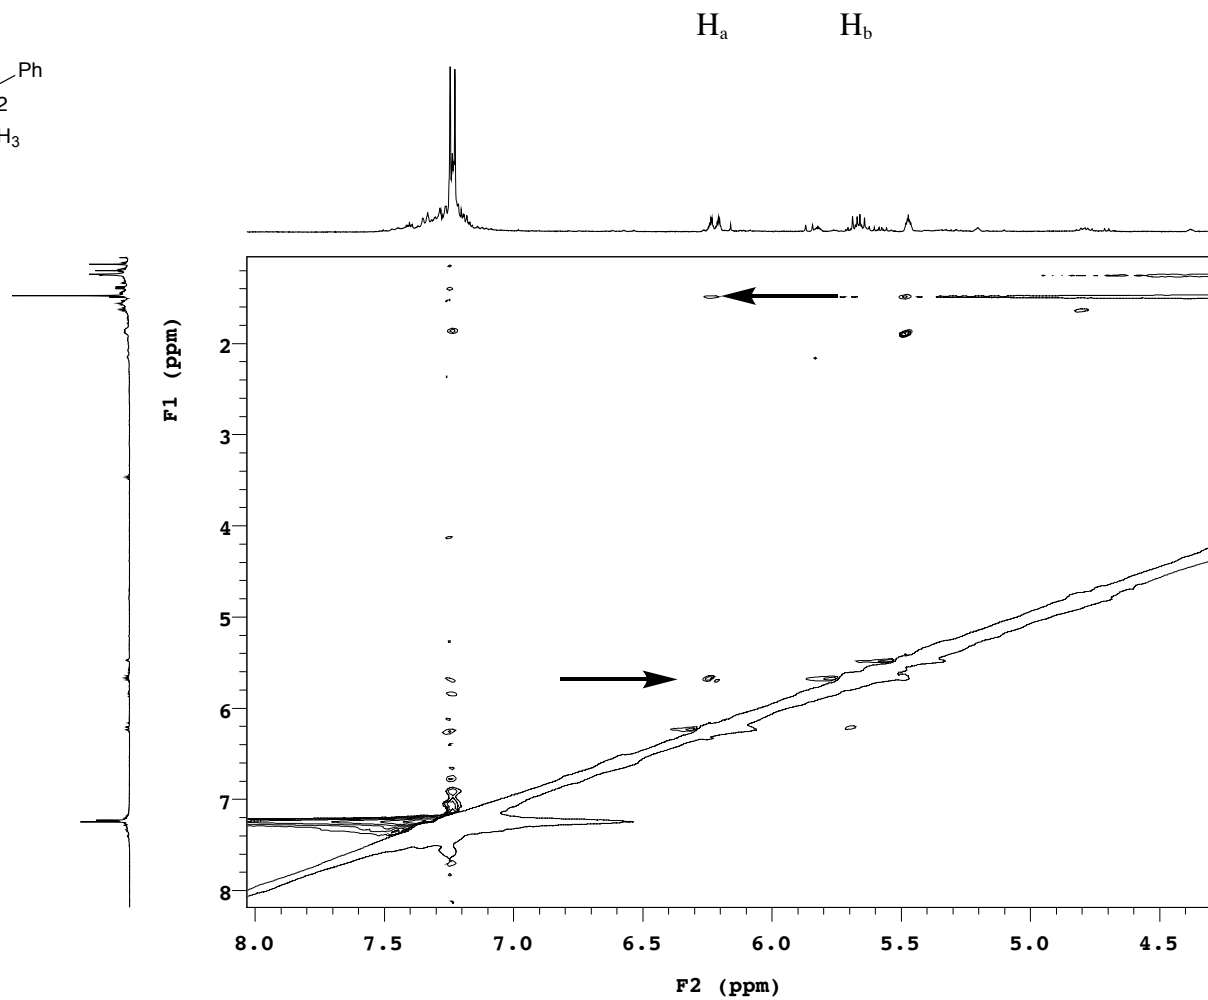

$^1\text{H}$  NMR (400 MHz),  $\text{CDCl}_3$ , as an inseparable 3:1 *E:Z* mixture of stereoisomers at the  $\alpha,\beta$ -alkene

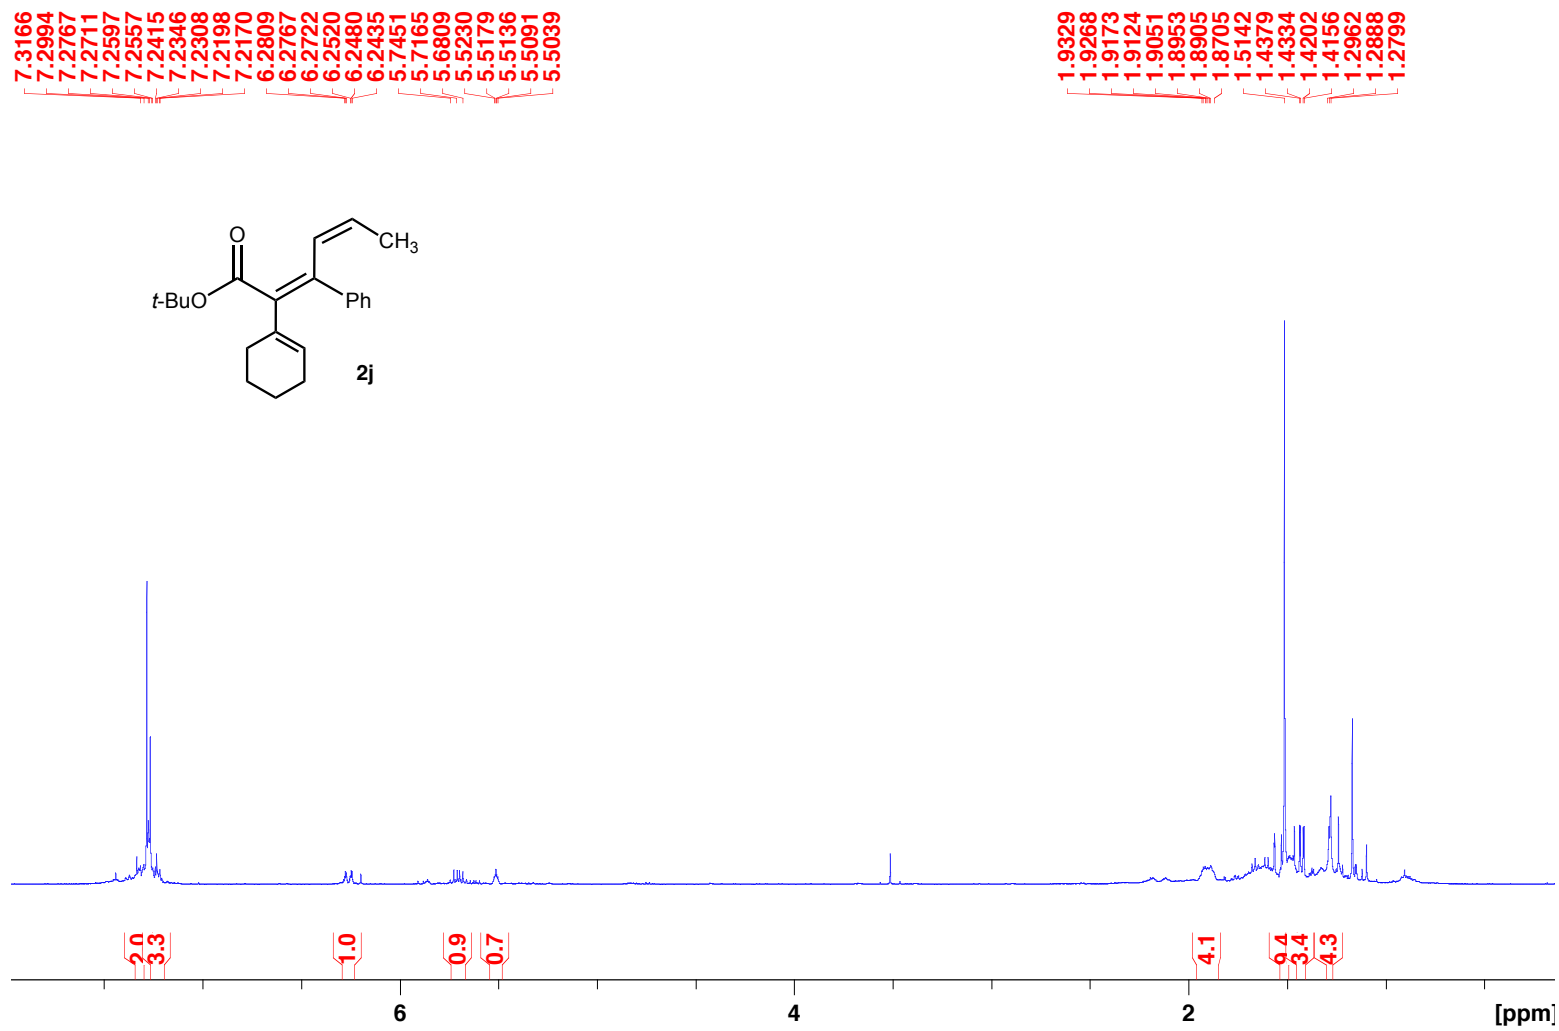

$^{13}\text{C}\{^1\text{H}\}$  NMR (100 MHz),  $\text{CDCl}_3$ , as an inseparable 3:1 *E:Z* mixture of stereoisomers at the  $\alpha,\beta$ -alkene

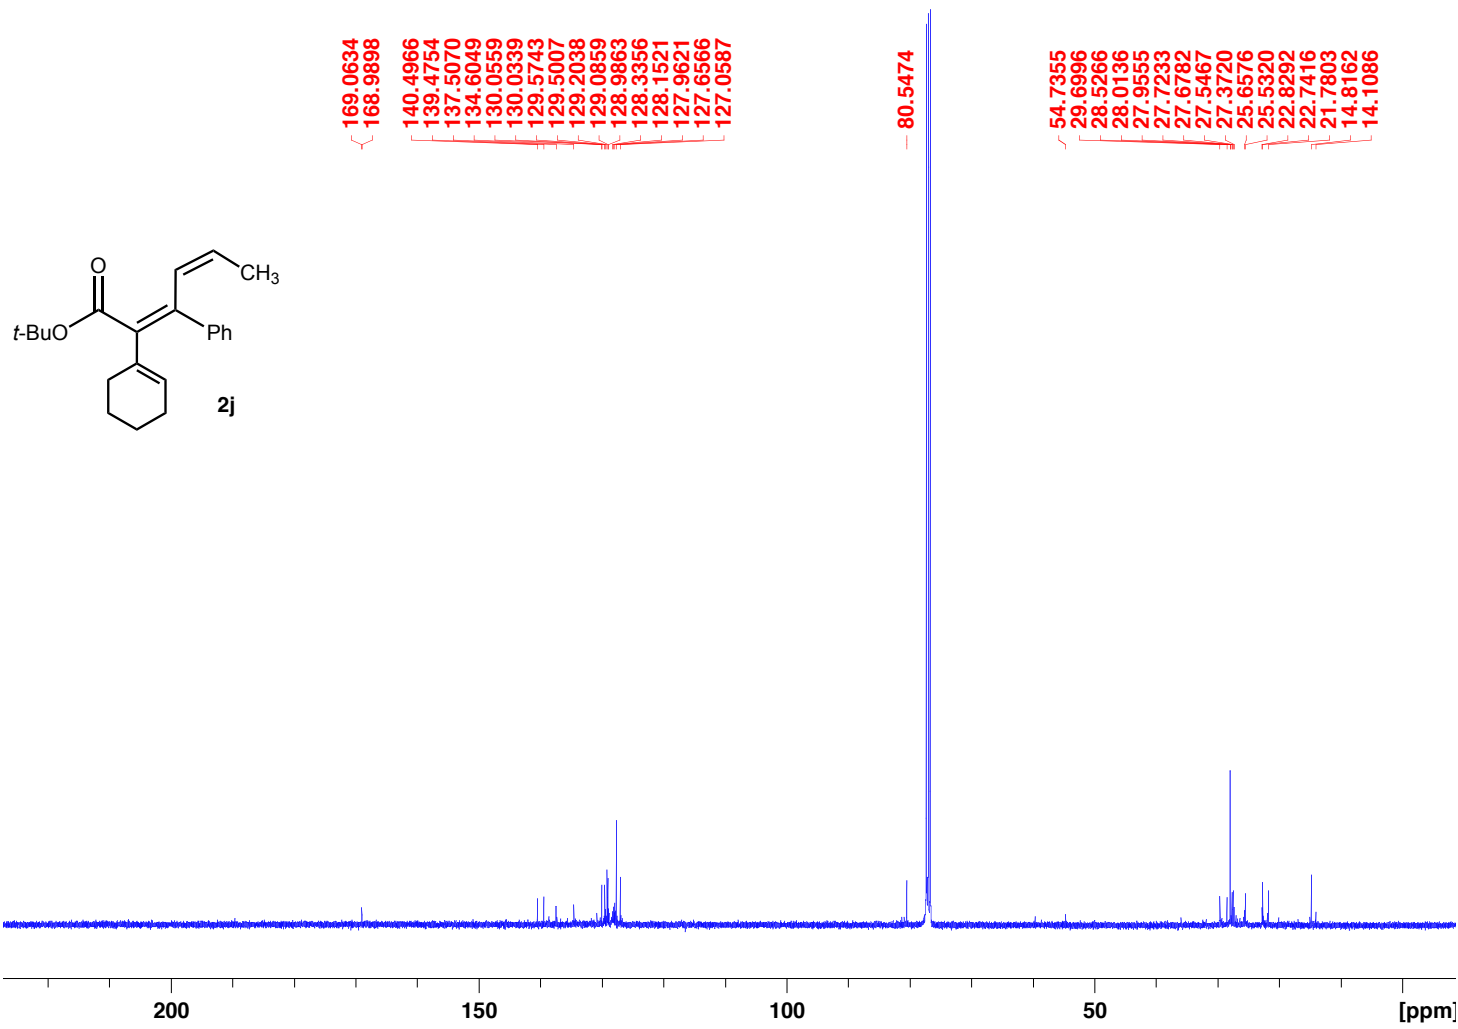

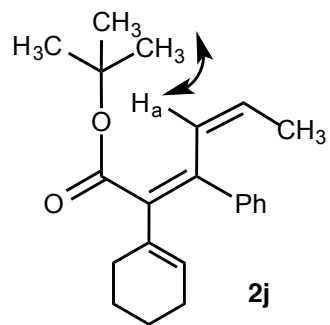

NOESY

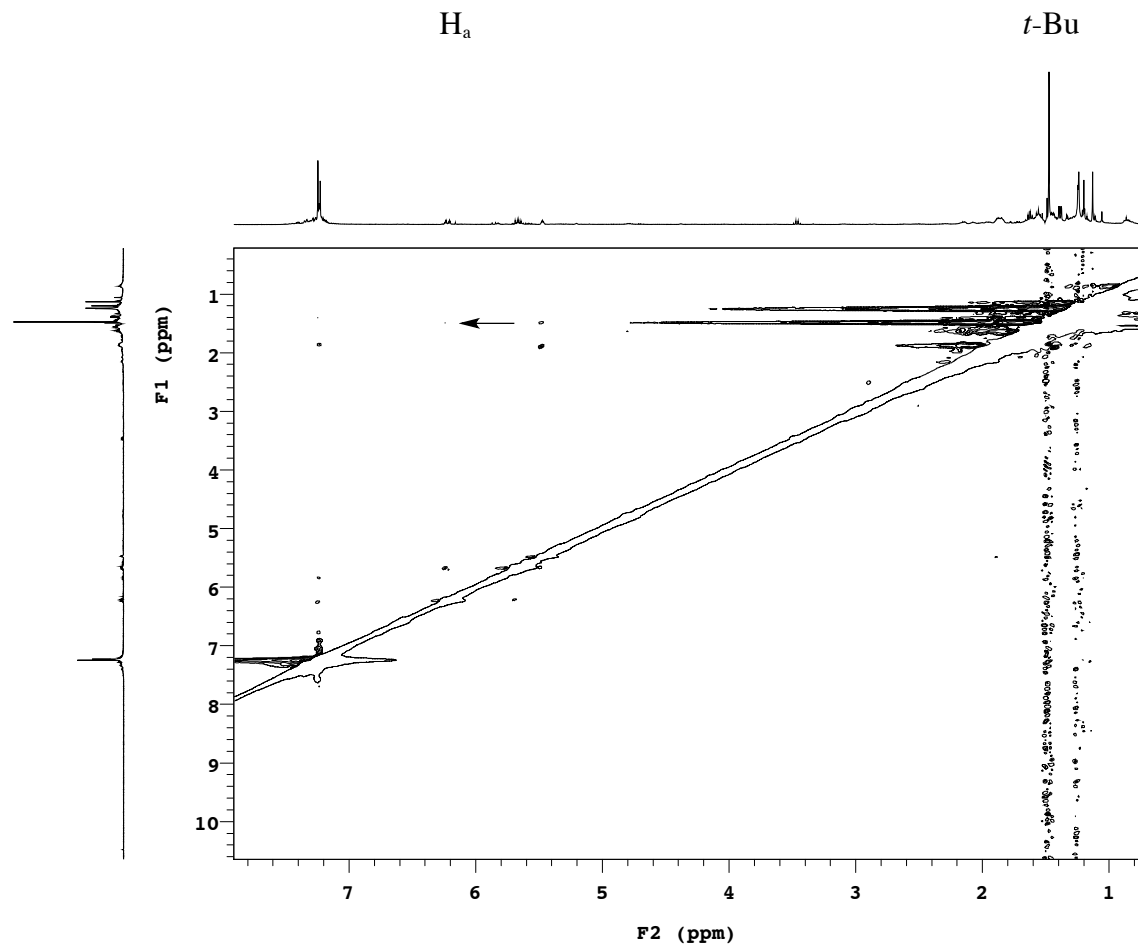

$^1\text{H}$  NMR (400 MHz),  $\text{CDCl}_3$ , as an inseparable 1:10 *E*:*Z* mixture of stereoisomers at the  $\alpha,\beta$ -alkene

7.4779  
7.4736  
7.3694  
7.3653  
7.3581  
7.3566  
7.3524  
7.3487  
7.3424  
7.3384  
7.3312  
7.3296

6.0392  
6.0349  
6.0138  
6.0098  
6.0055  
5.7205  
5.7033  
5.6911  
5.6861  
5.6739

3.0972  
3.0888  
3.0799  
3.0681  
3.0600  
3.0523  
3.0398  
3.0316  
1.8768  
1.8444  
1.8399  
1.8292  
1.8213  
1.8048  
1.7986  
1.7764  
1.7505  
1.7421  
1.7345  
1.7024  
1.6989  
1.6940  
1.6252  
1.6208  
1.5160  
1.3557  
1.3311  
1.3012  
1.2832

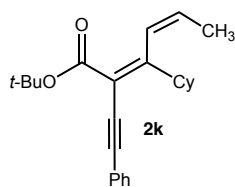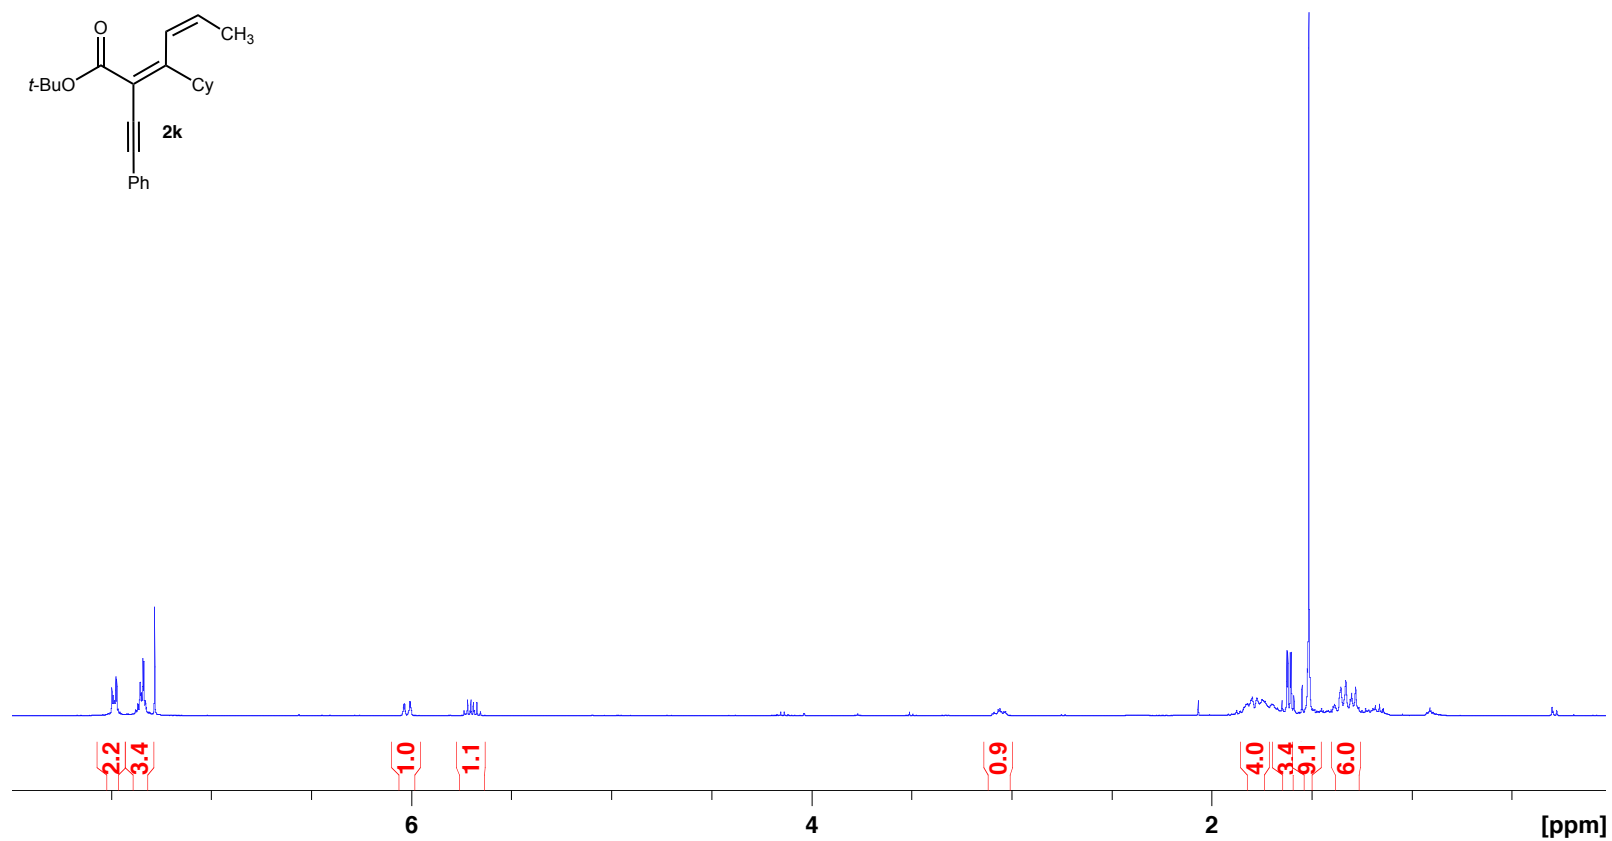

$^{13}\text{C}\{^1\text{H}\}$  NMR (100 MHz),  $\text{CDCl}_3$ , as an inseparable 1:10 *E*:*Z* mixture of stereoisomers at the  $\alpha,\beta$ -alkene

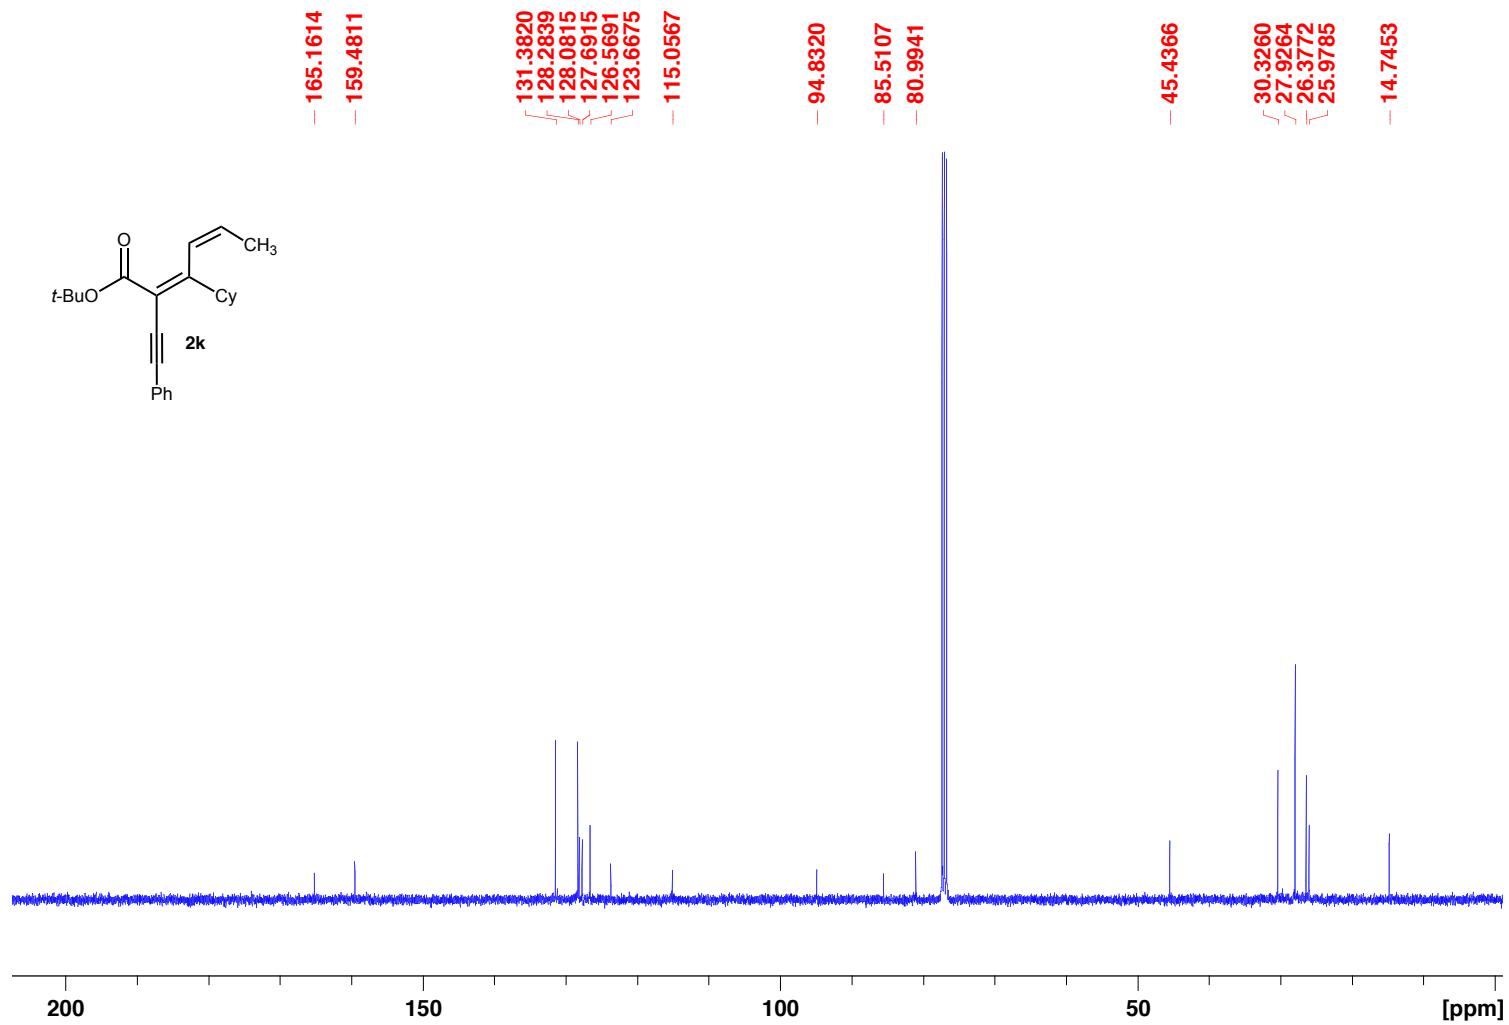

$^1\text{H}$  NMR (400 MHz),  $\text{CDCl}_3$ , as an inseparable 1:10 *E*:*Z* mixture of stereoisomers at the  $\alpha,\beta$ -alkene

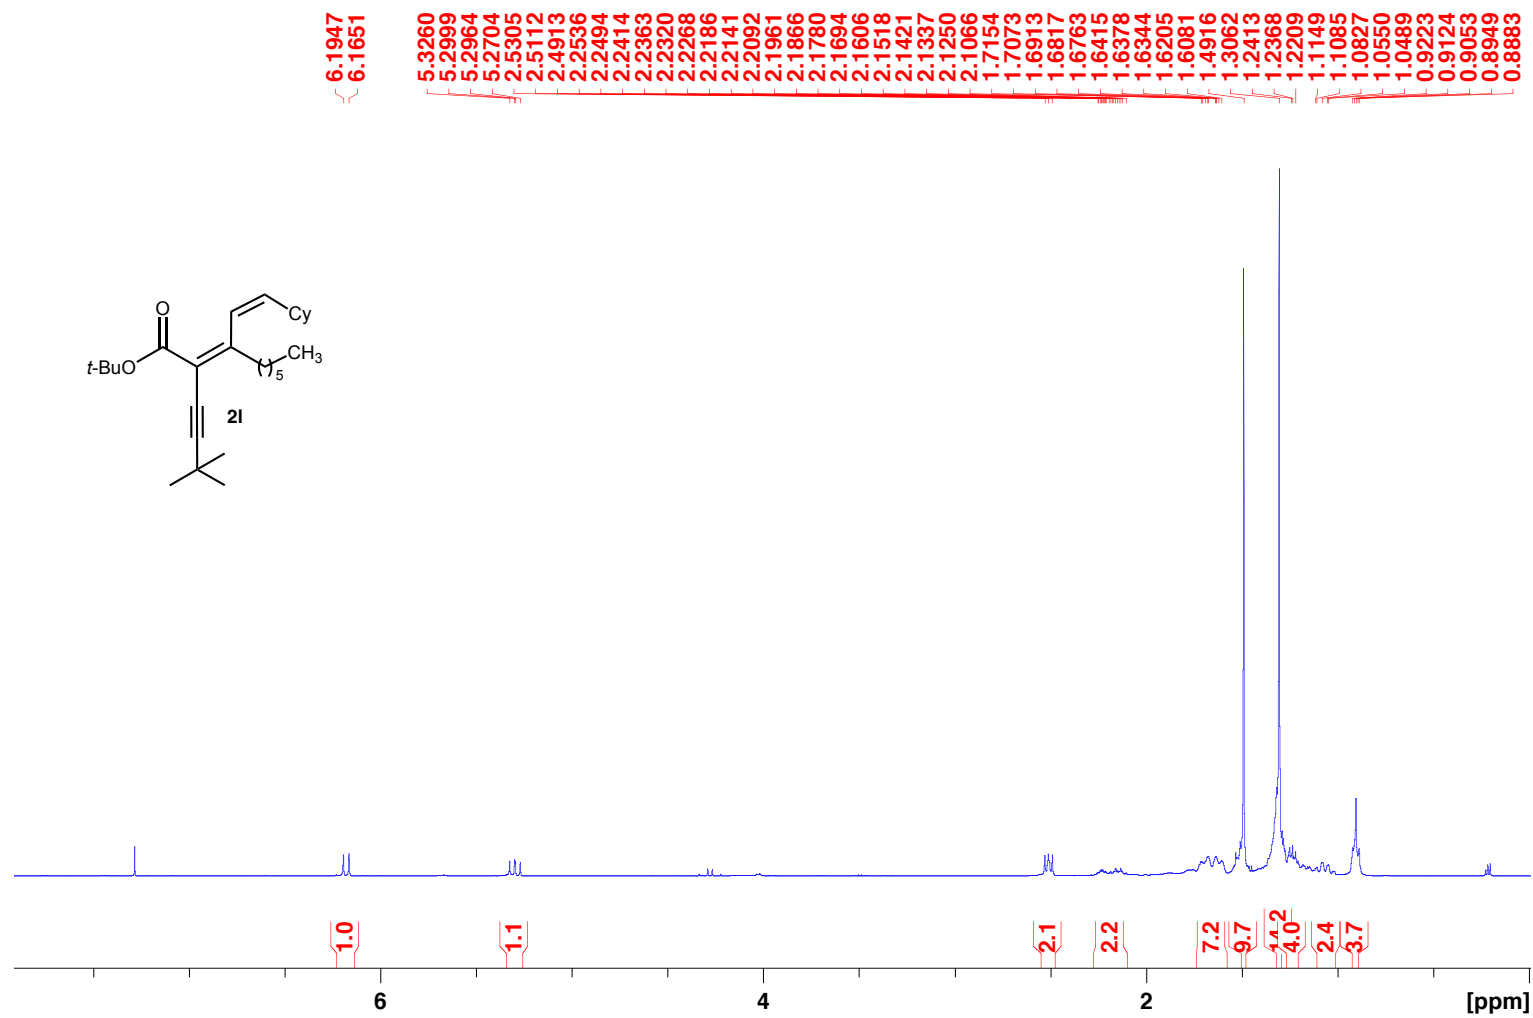

$^{13}\text{C}\{^1\text{H}\}$  NMR (100 MHz),  $\text{CDCl}_3$ , as an inseparable 1:10 *E*:*Z* mixture of stereoisomers at the  $\alpha,\beta$ -alkene

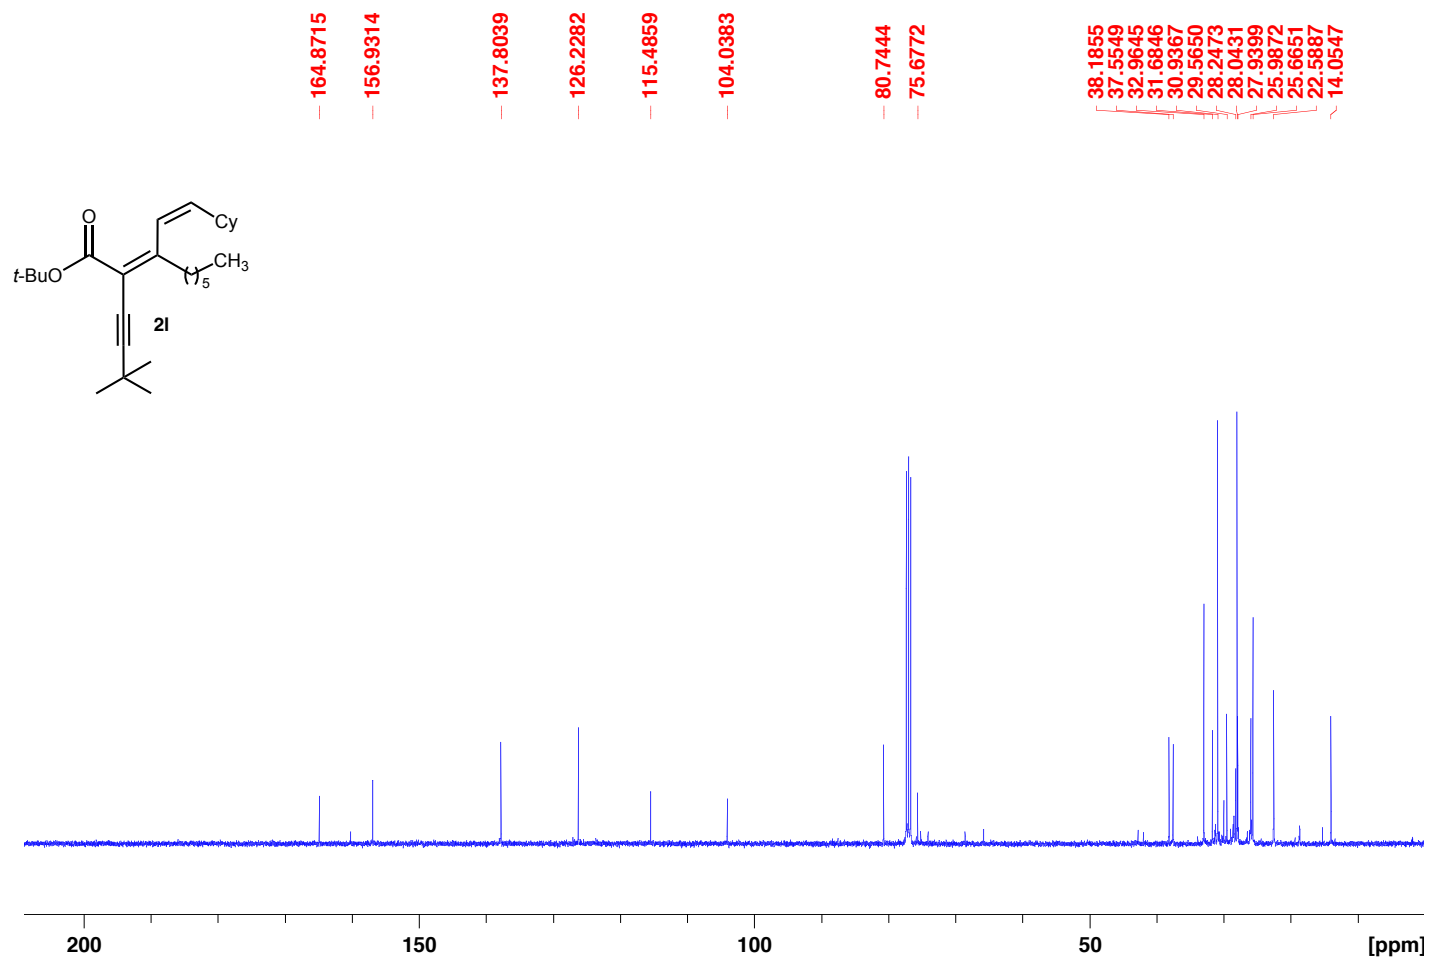



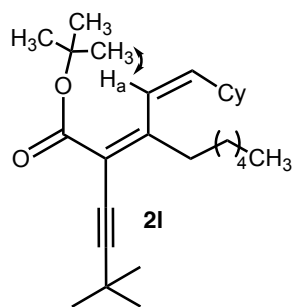

NOESY

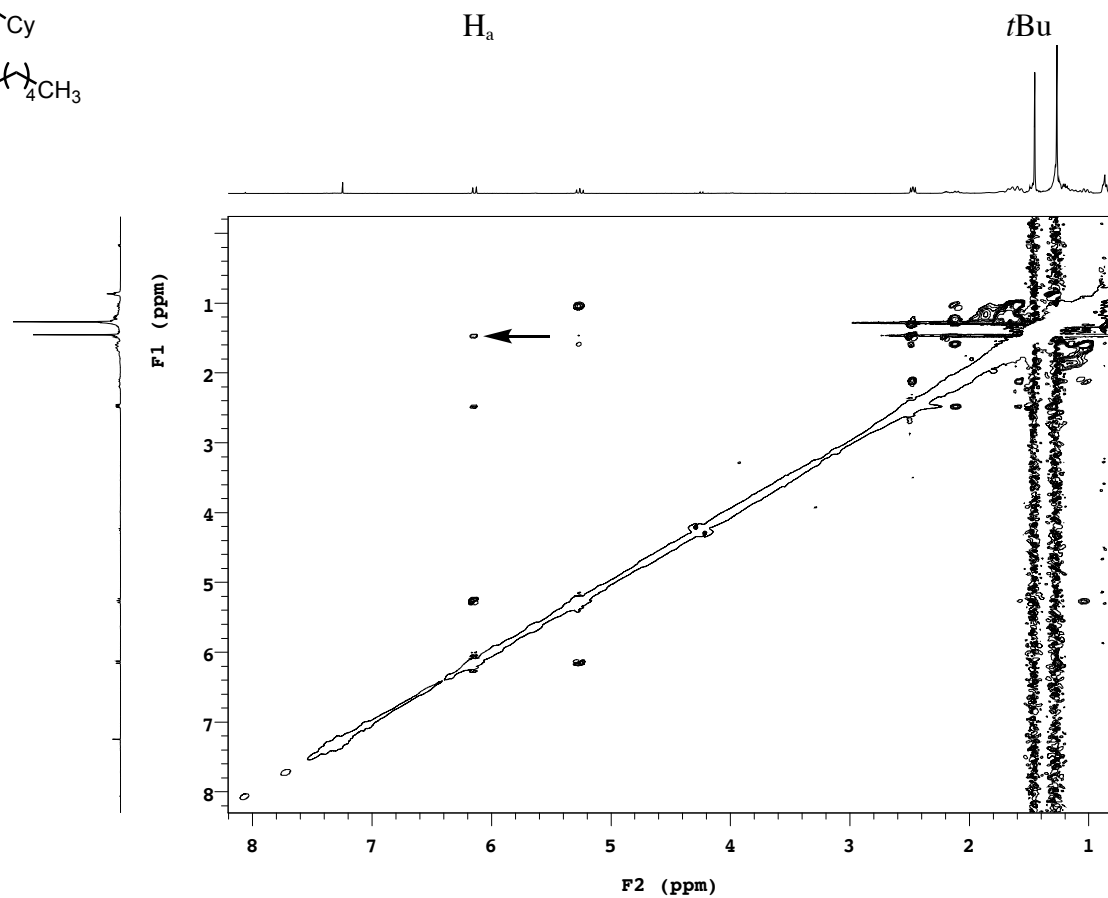

$^1\text{H}$  NMR (400 MHz),  $\text{CDCl}_3$

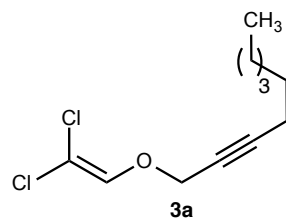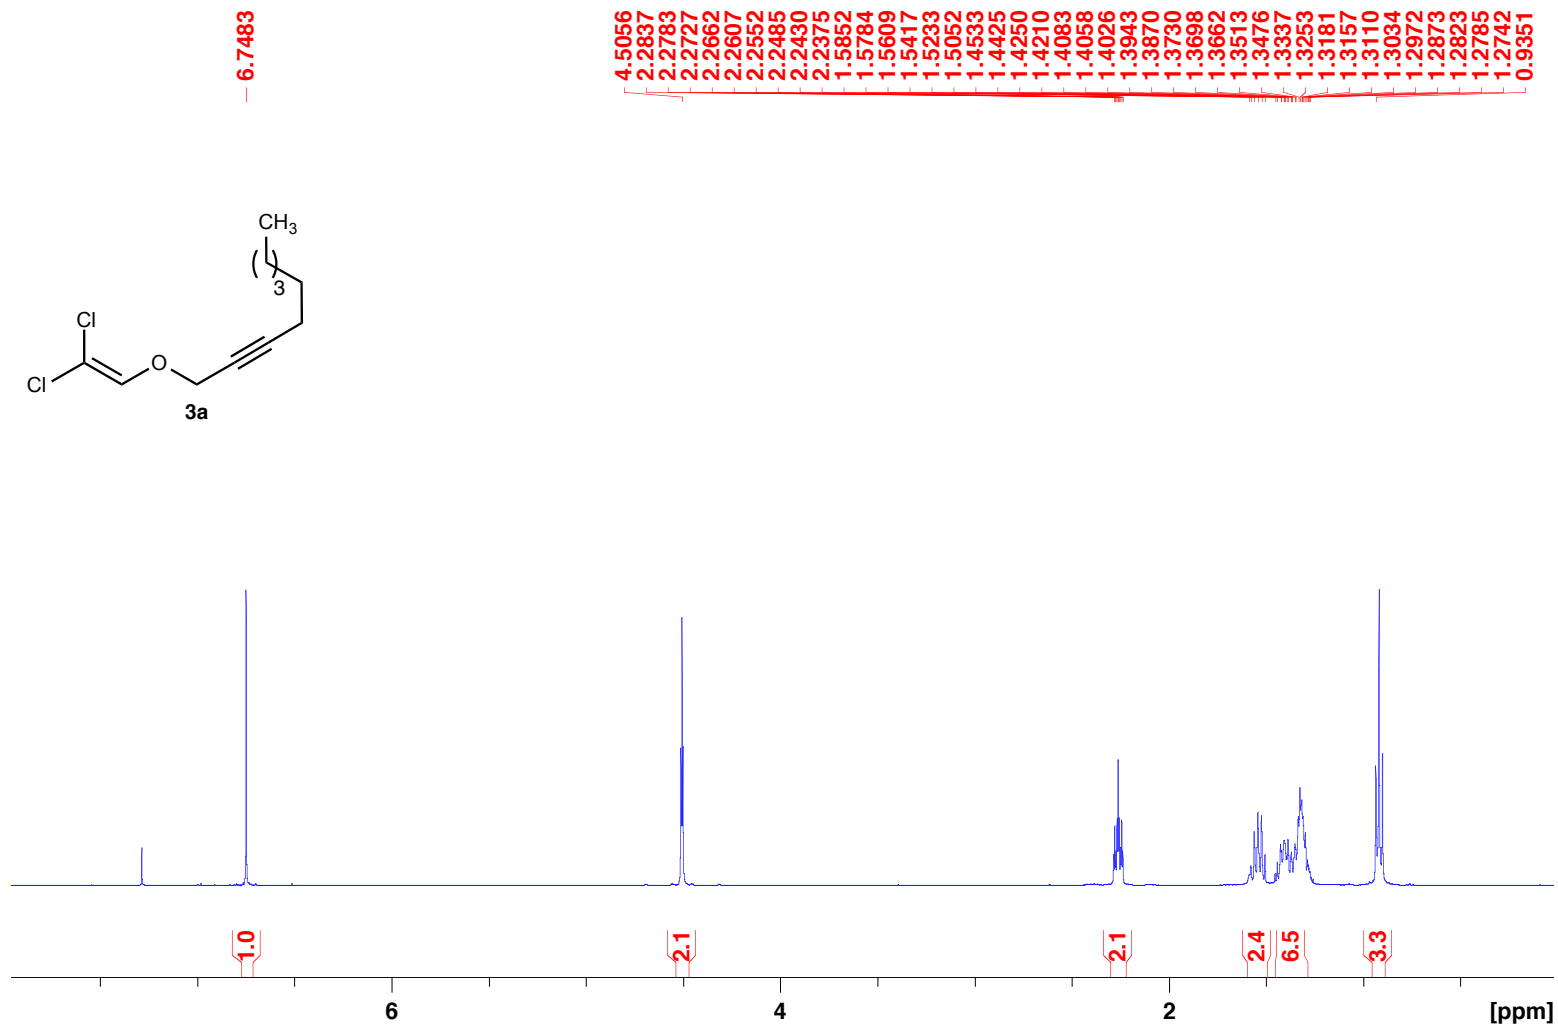

$^{13}\text{C}\{^1\text{H}\}$  NMR (100 MHz),  $\text{CDCl}_3$

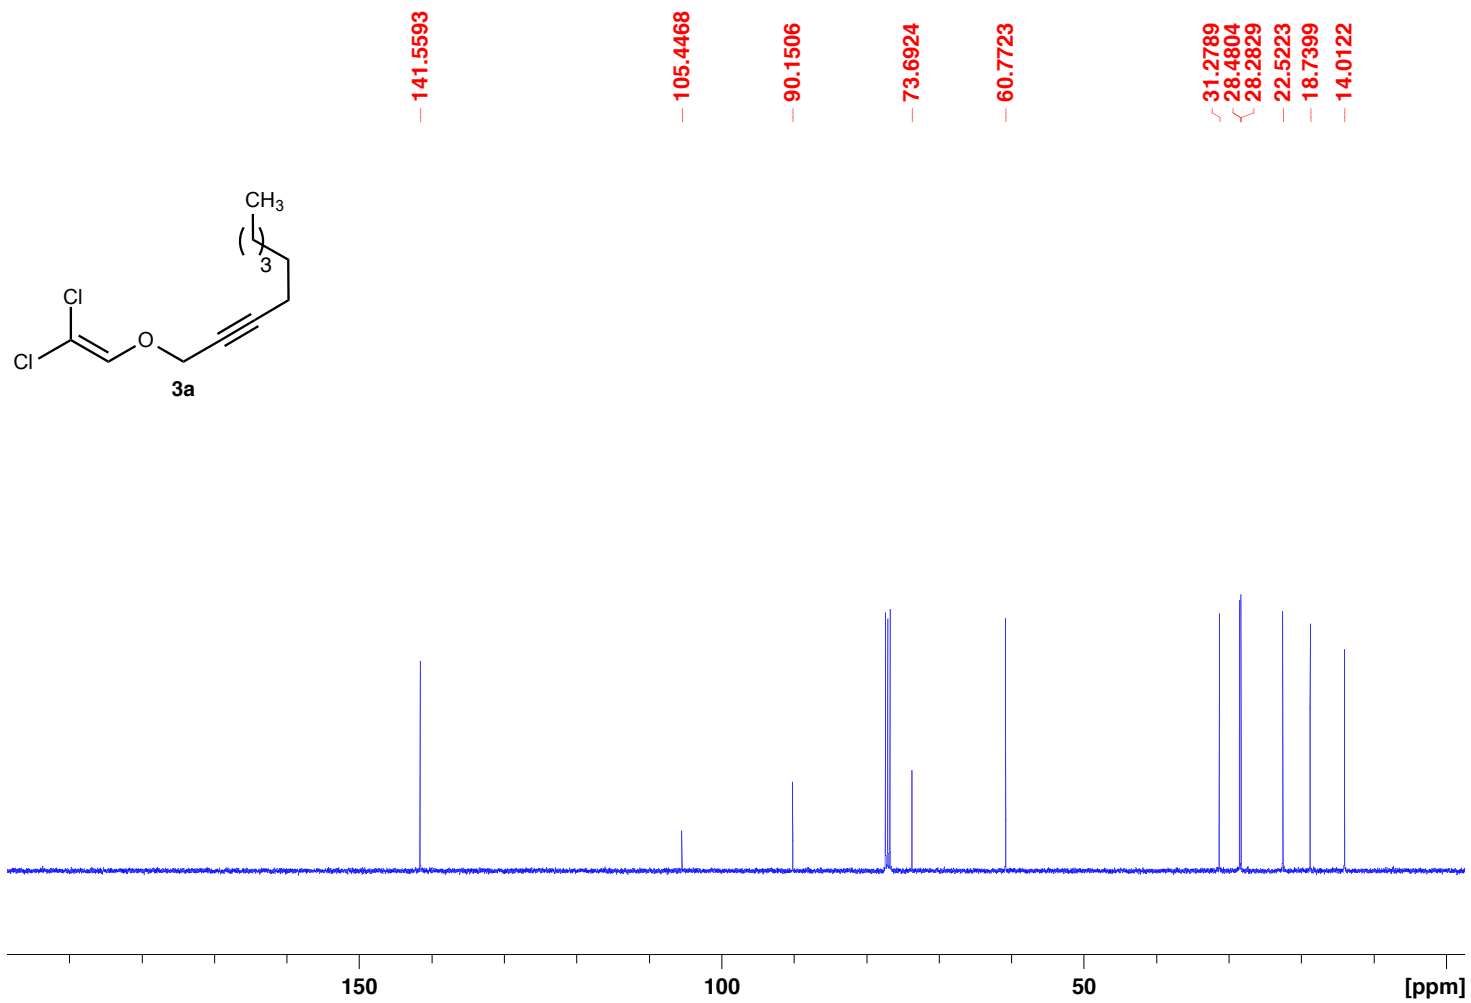

$^1\text{H}$  NMR (400 MHz),  $\text{CDCl}_3$

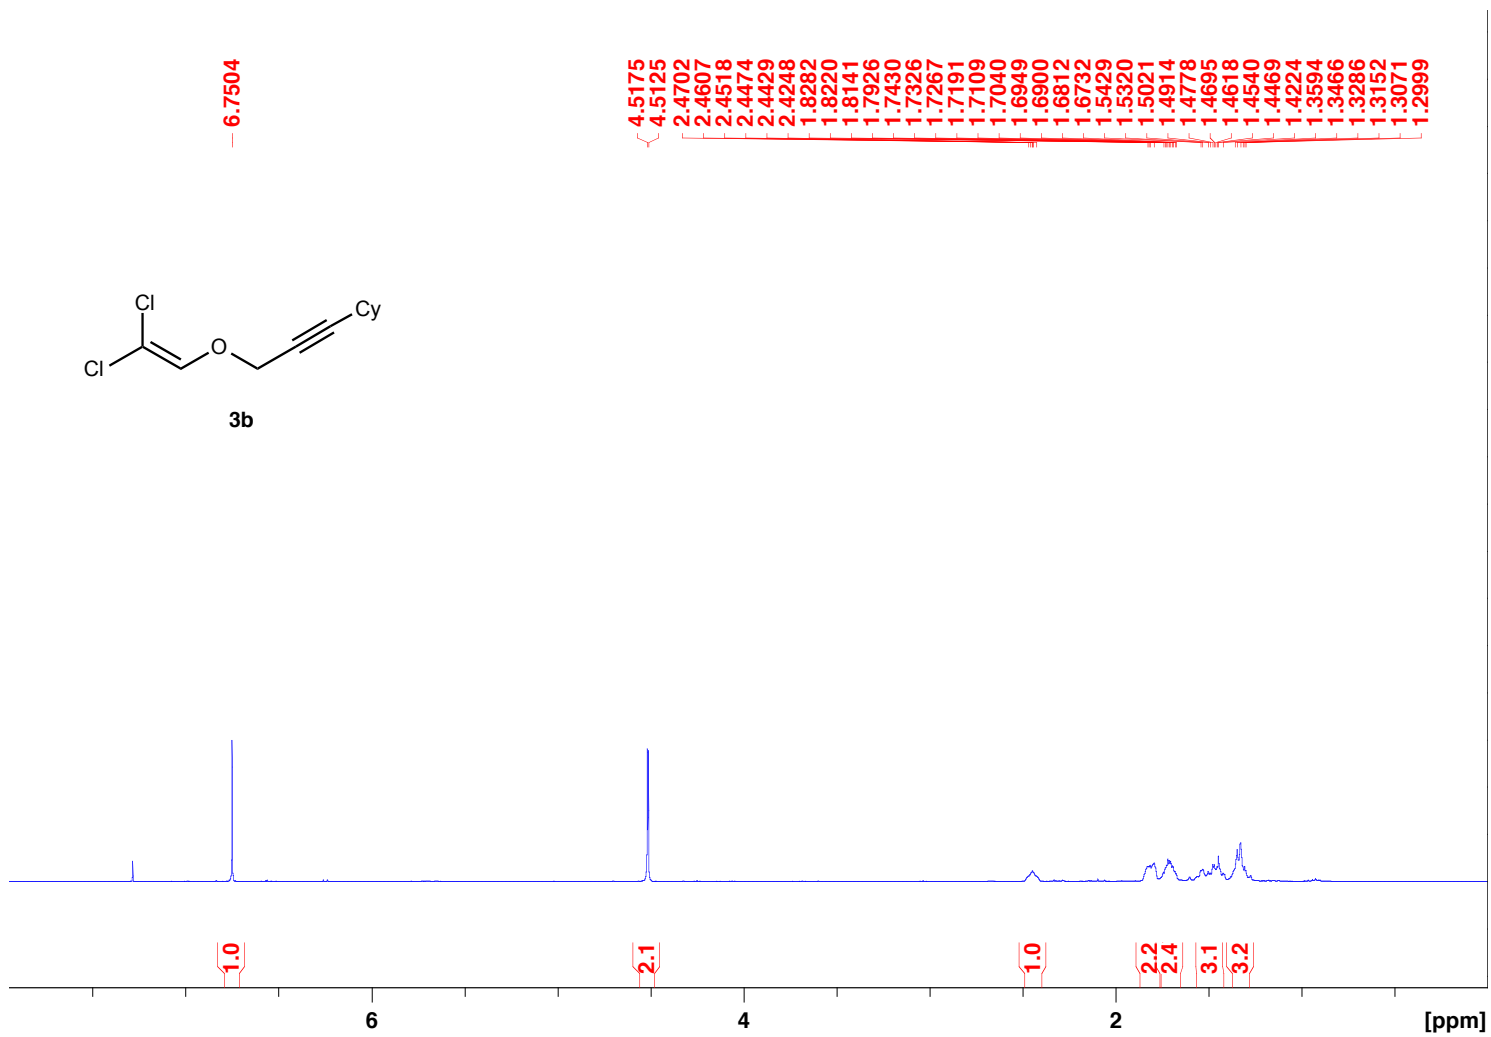

$^{13}\text{C}\{^1\text{H}\}$  NMR (100 MHz),  $\text{CDCl}_3$

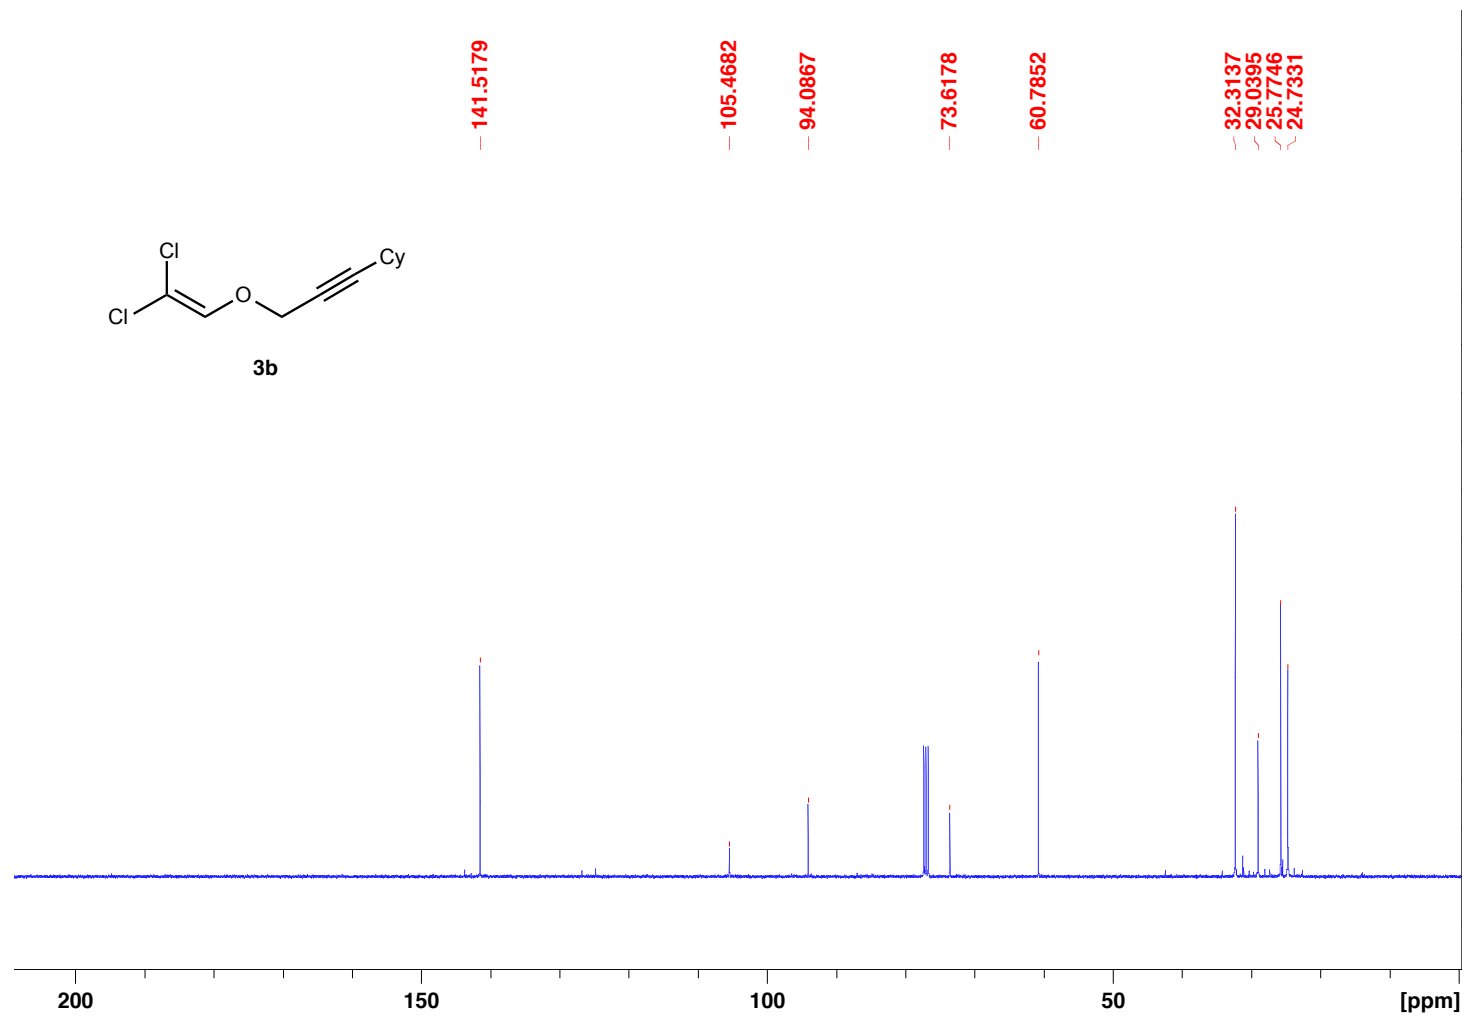

$^1\text{H}$  NMR (400 MHz),  $\text{CDCl}_3$

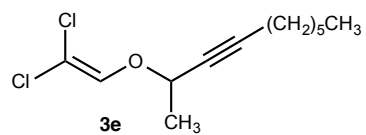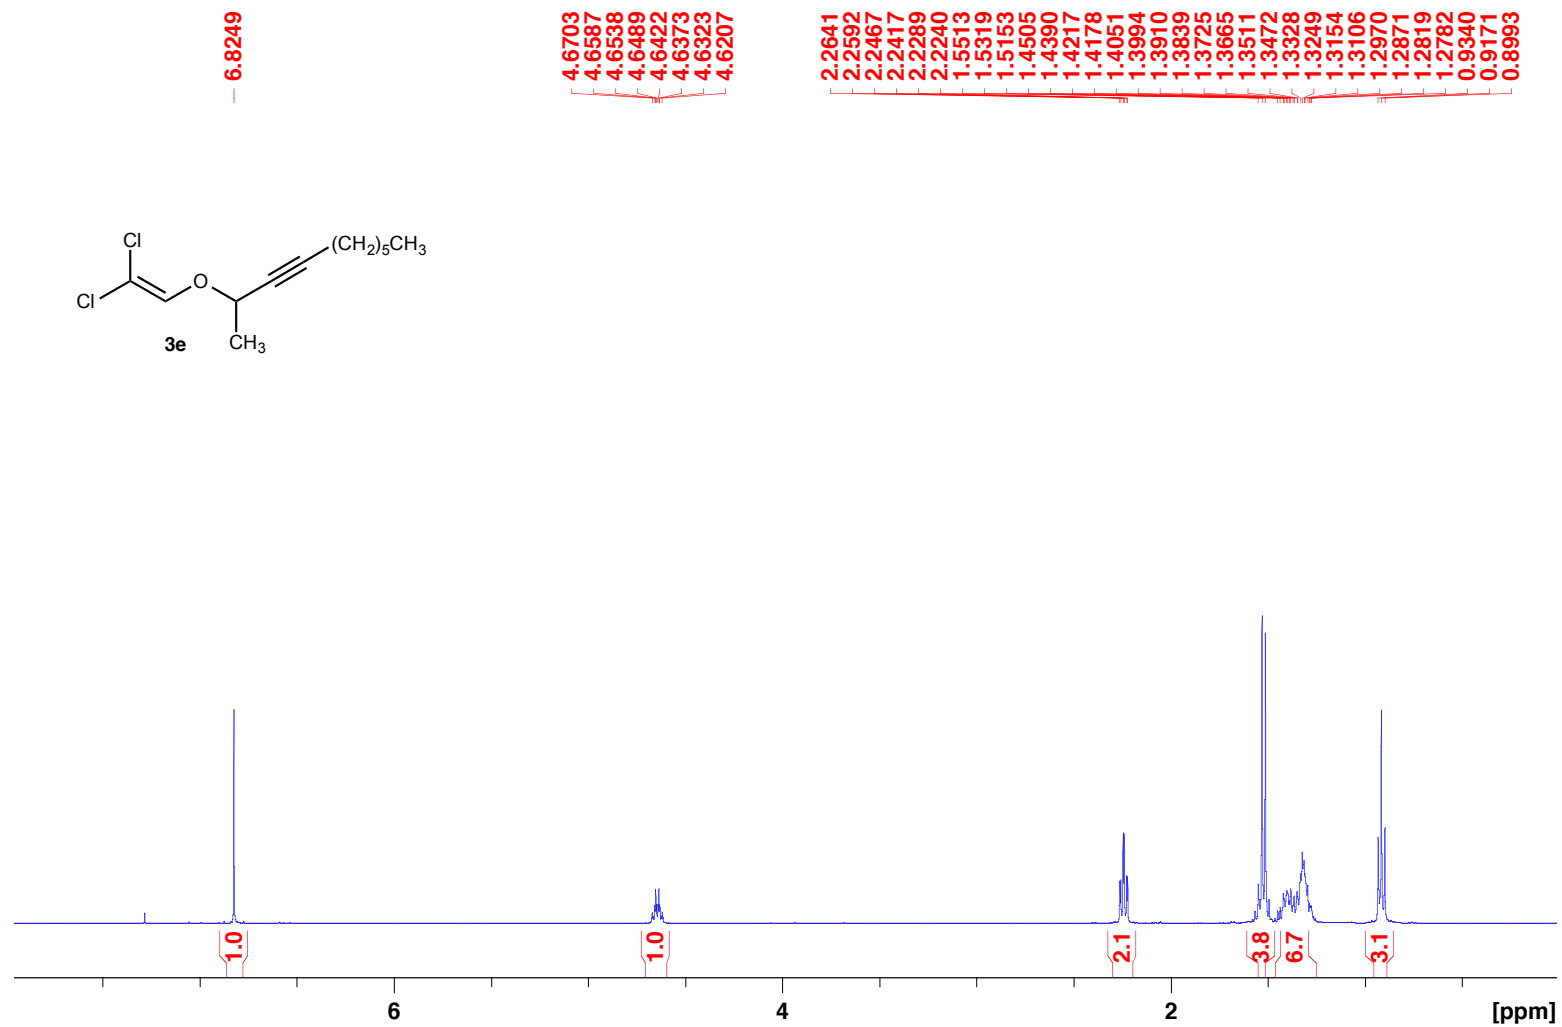

$^{13}\text{C}\{^1\text{H}\}$  NMR (100 MHz),  $\text{CDCl}_3$

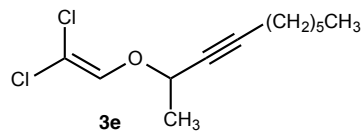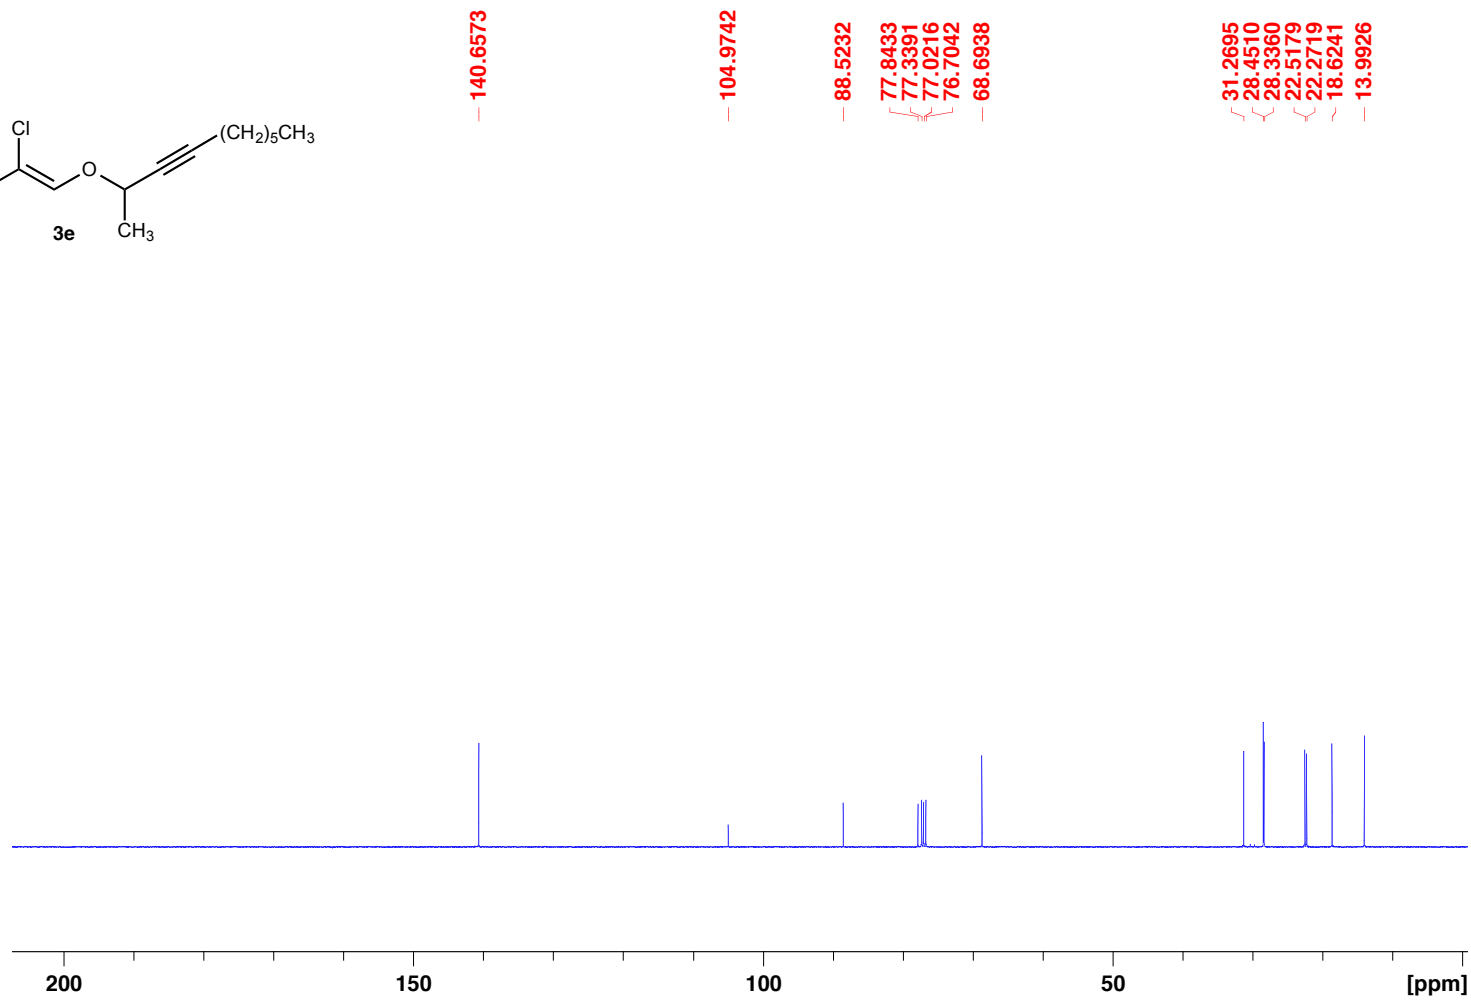

$^1\text{H}$  NMR (400 MHz),  $\text{CDCl}_3$

6.8329  
4.2815  
4.2765  
4.2714  
4.2650  
4.2599  
4.2549  
2.2887  
2.2836  
2.2713  
2.2662  
2.2537  
2.2486  
1.9020  
1.8981  
1.8932  
1.8841  
1.8749  
1.8702  
1.8666  
1.8621  
1.8053  
1.8000  
1.7719  
1.7680  
1.7236  
1.7205  
1.7165  
1.7038  
1.6952  
1.6870  
1.6788  
1.5748  
1.5649  
1.5472  
1.5454  
1.5273  
1.5096  
1.4563  
1.4376  
1.4336  
1.4209  
1.4180  
1.4070  
1.3995  
1.3547  
1.3512  
1.3377  
1.3305  
1.3223  
1.3124  
1.3047  
1.2945  
1.2906  
1.2818  
1.2690  
1.2592  
1.2507  
1.2444  
1.2209  
1.1993  
1.1919  
1.1684  
1.1614  
1.1381  
1.1346  
1.1303  
1.1028  
0.9380  
0.9210

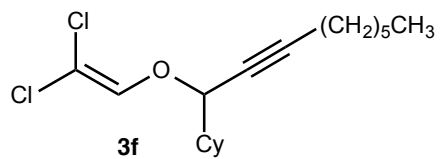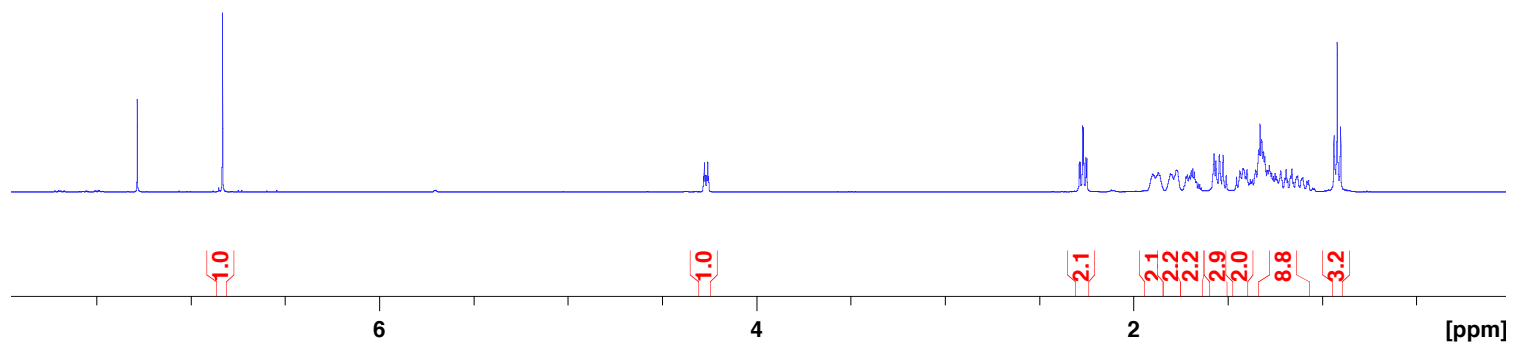



$^{13}\text{C}\{^1\text{H}\}$  NMR (100 MHz),  $\text{CDCl}_3$

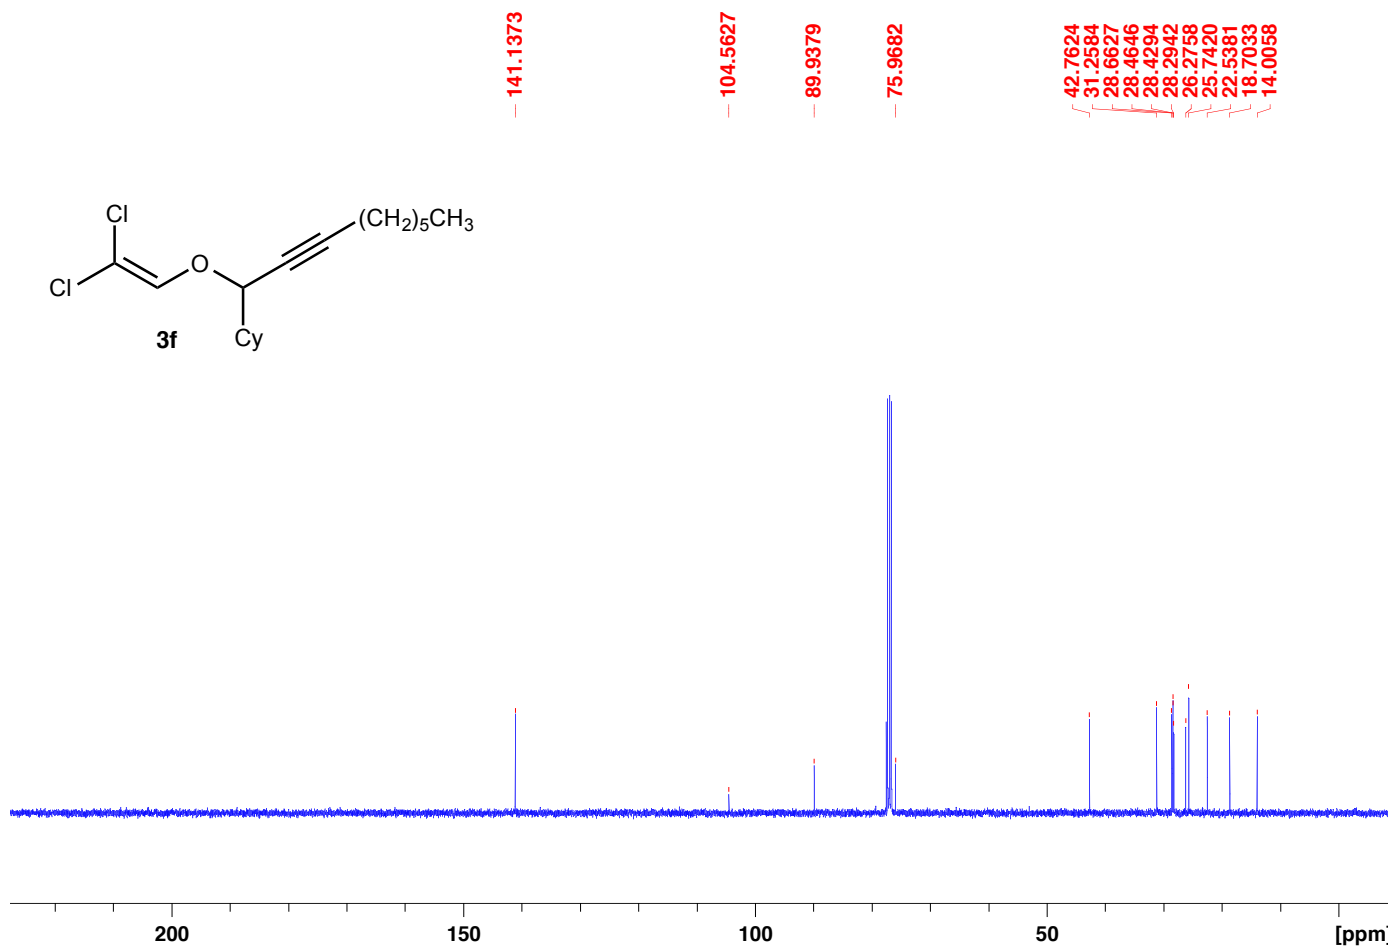

$^1\text{H}$  NMR (400 MHz),  $\text{CDCl}_3$

7.3576  
7.3536  
7.3385  
7.3299  
7.3206  
7.2841  
7.2627  
7.2531  
7.2468  
7.2345  
7.2332

4.4967  
4.4809  
4.4630

2.9146  
2.8911  
2.8736  
2.8555  
2.8357  
2.8171  
2.7999  
2.7815  
2.2243  
2.2060  
2.1895  
2.1880  
2.1717  
2.1530  
2.1343  
2.1200  
2.1040  
2.1016  
2.0873  
2.0863  
2.0698  
2.0662  
2.0512  
2.0466  
1.2918

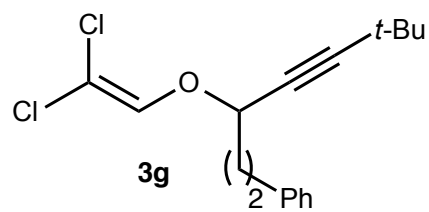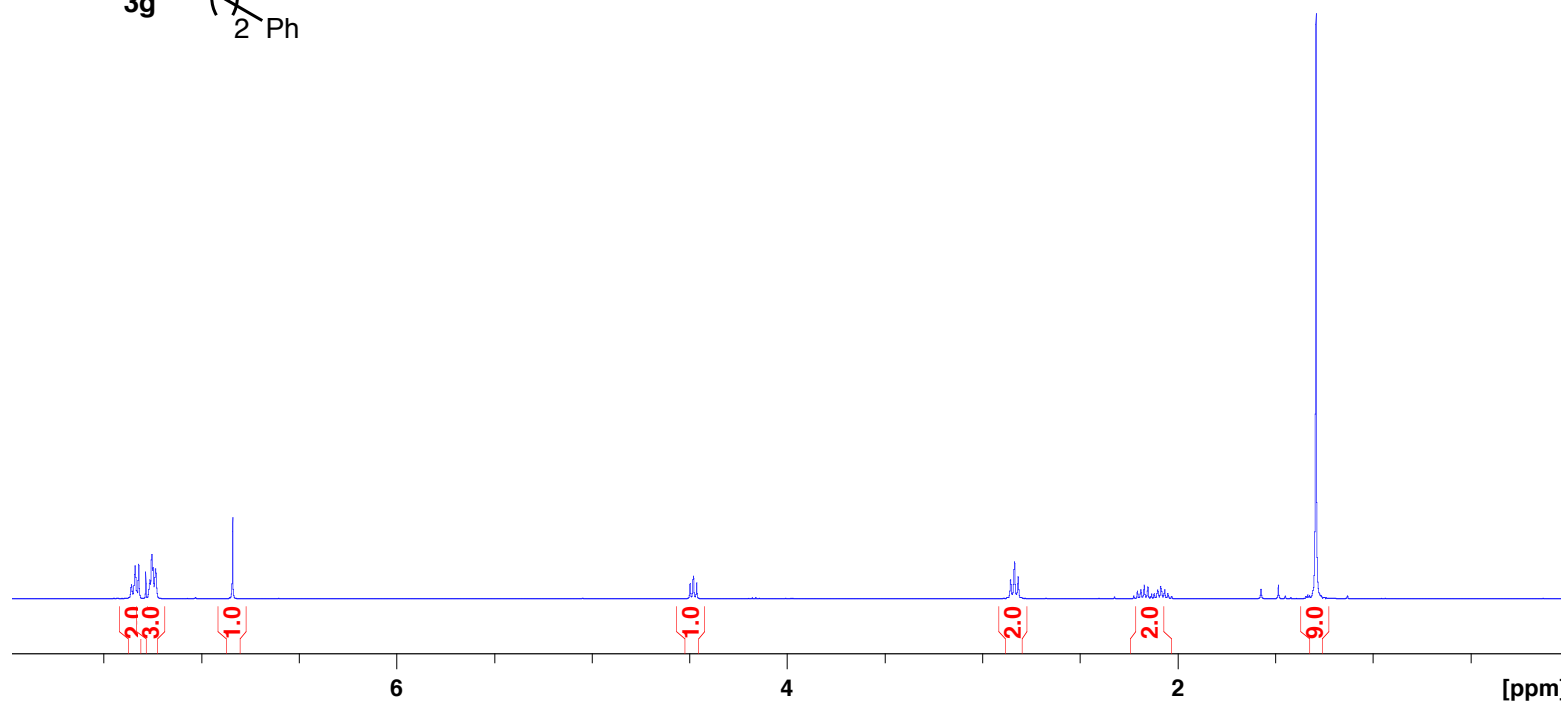

$^{13}\text{C}\{^1\text{H}\}$  NMR (100 MHz),  $\text{CDCl}_3$

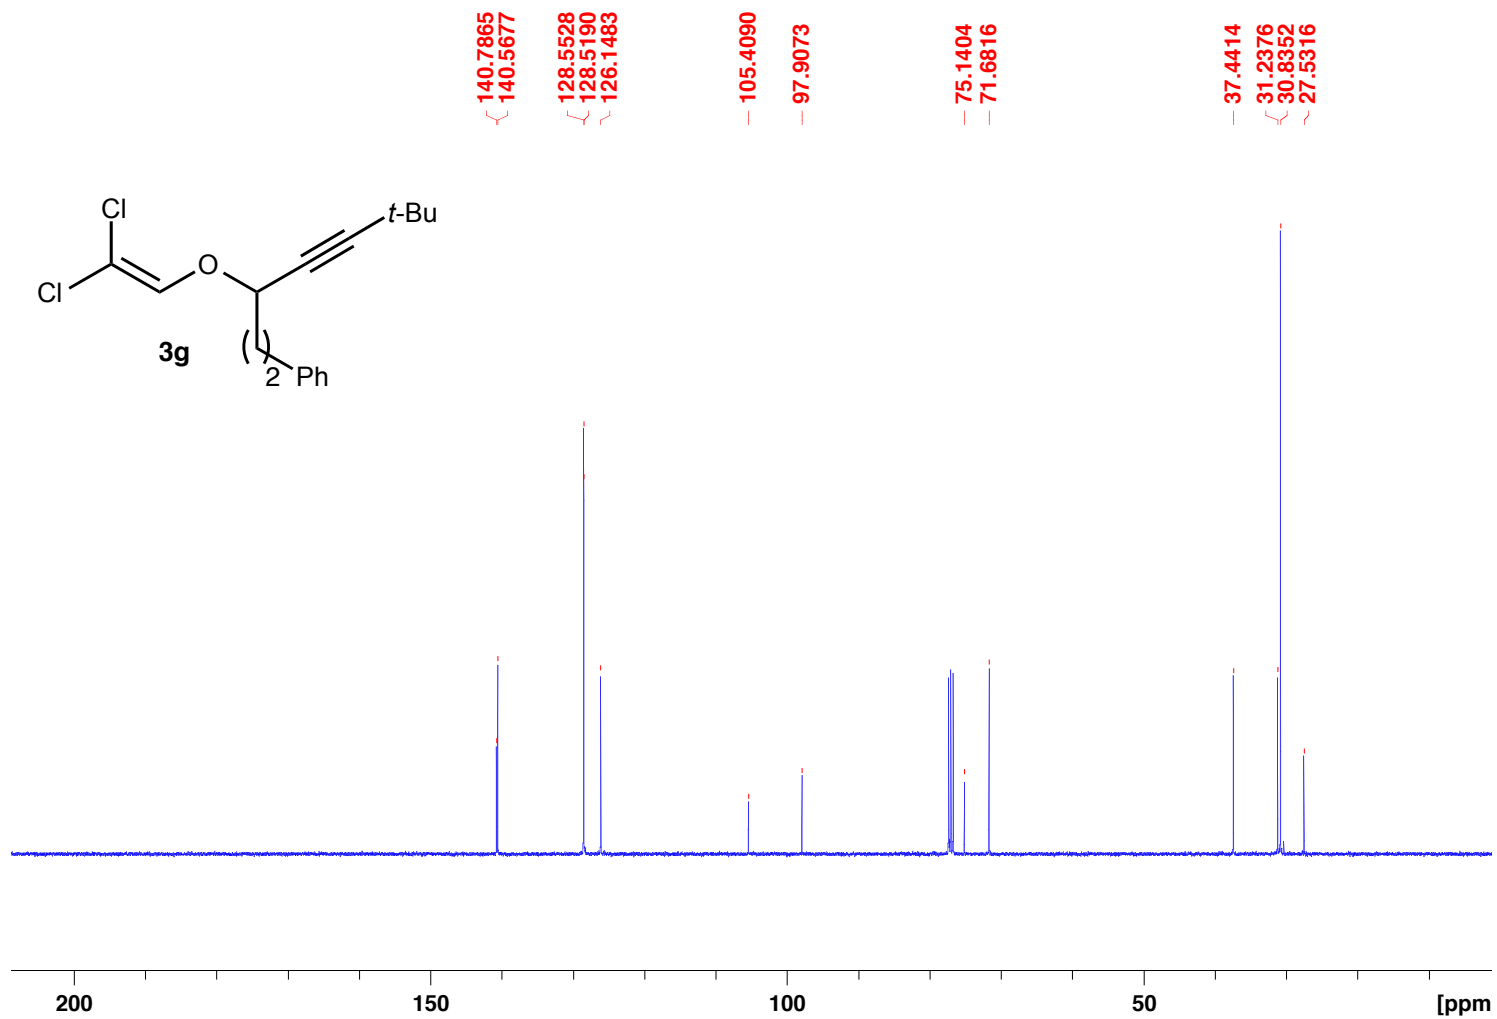

<sup>1</sup>H NMR (400 MHz), CDCl<sub>3</sub>

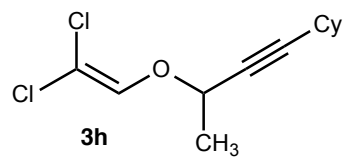

6.8345

4.6929  
4.6884  
4.6763  
4.6718  
4.6598  
4.6553  
4.6432  
4.6388  
2.4690  
2.4649  
2.4557  
2.4512  
2.4465  
2.4425  
2.4372  
2.4334  
2.4241  
2.4203  
1.8271  
1.8193  
1.8108  
1.8046  
1.7825  
1.7316  
1.7241  
1.7190  
1.7099  
1.7039  
1.6949  
1.6892  
1.6813  
1.5807  
1.5350  
1.5282  
1.5185  
1.5079  
1.5039  
1.4802  
1.4717  
1.4522  
1.4485  
1.4254  
1.3754  
1.3553  
1.3376  
1.3235  
1.3157

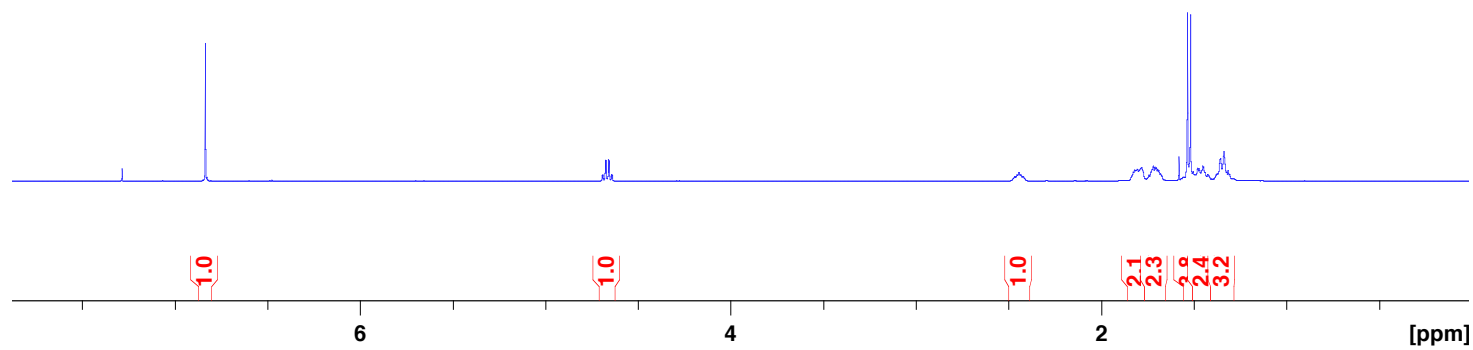

$^{13}\text{C}\{^1\text{H}\}$  NMR (100 MHz),  $\text{CDCl}_3$

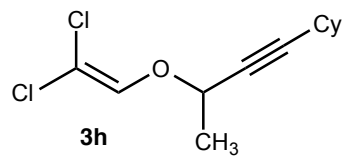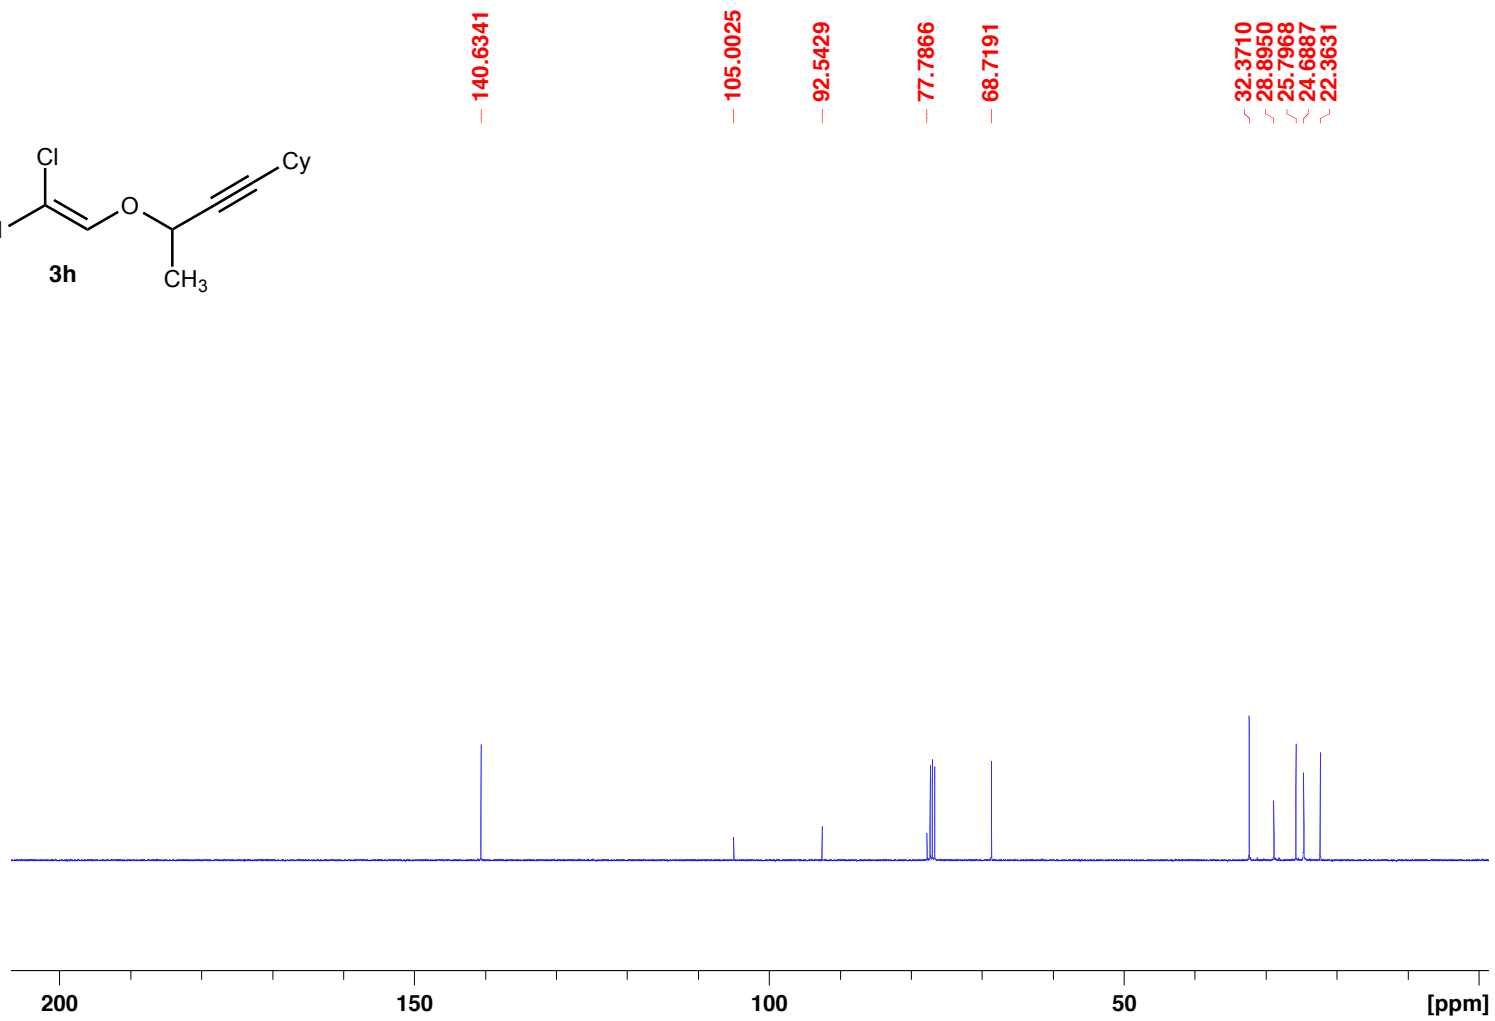

$^1\text{H}$  NMR (400 MHz),  $\text{CDCl}_3$

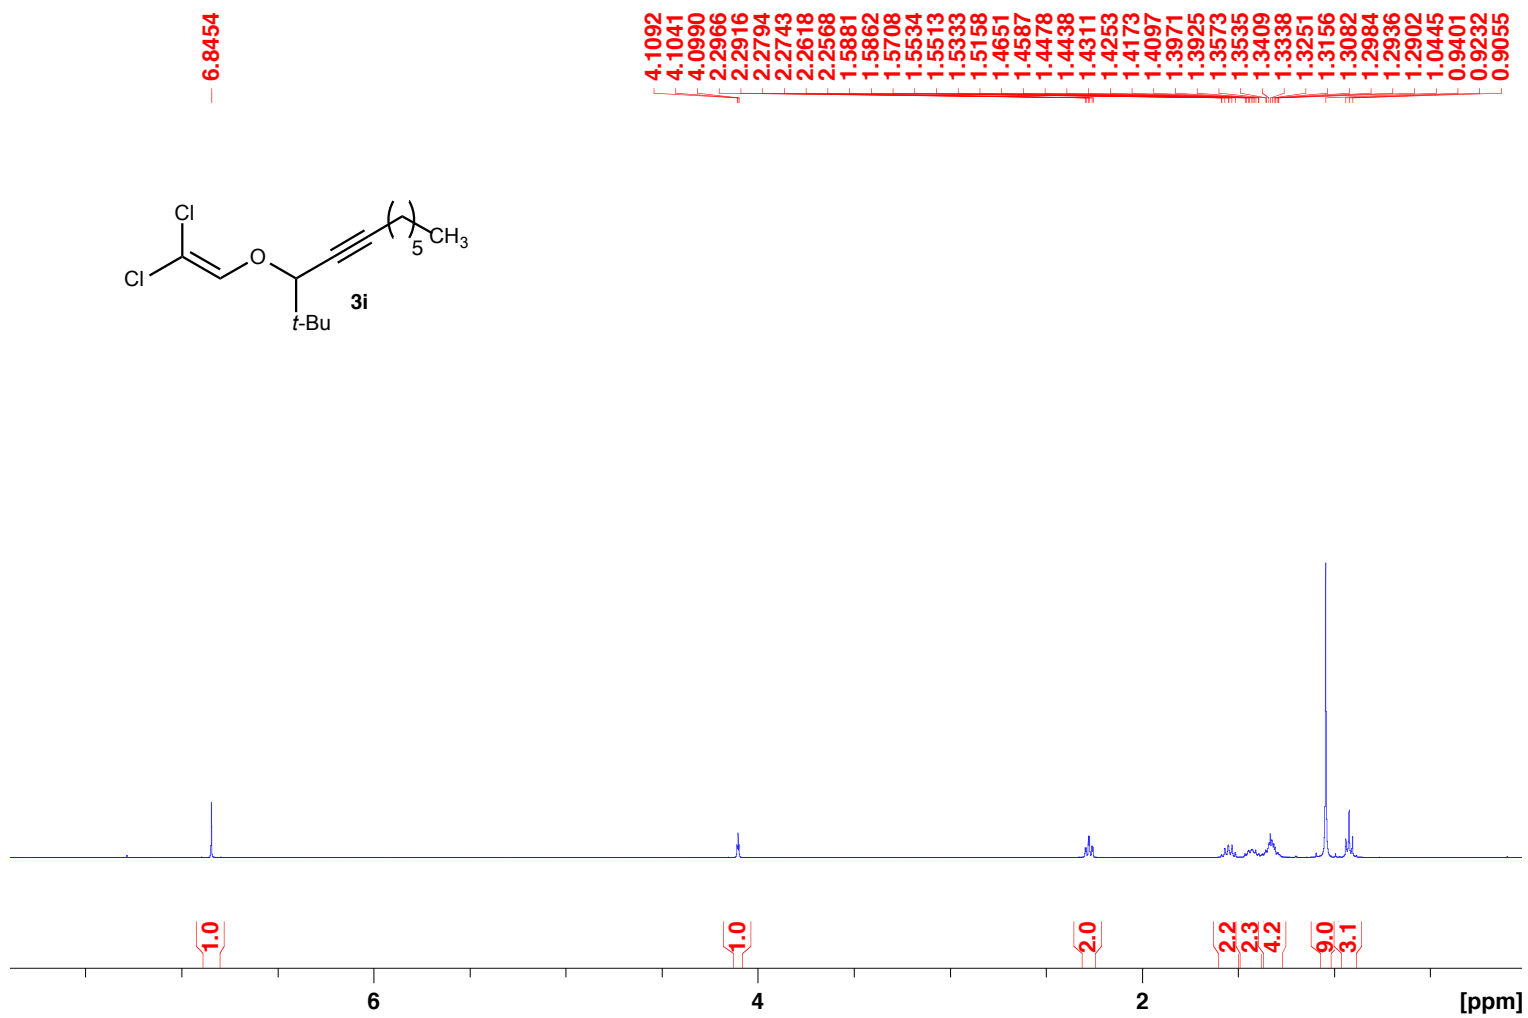

$^{13}\text{C}\{^1\text{H}\}$  NMR (100 MHz),  $\text{CDCl}_3$

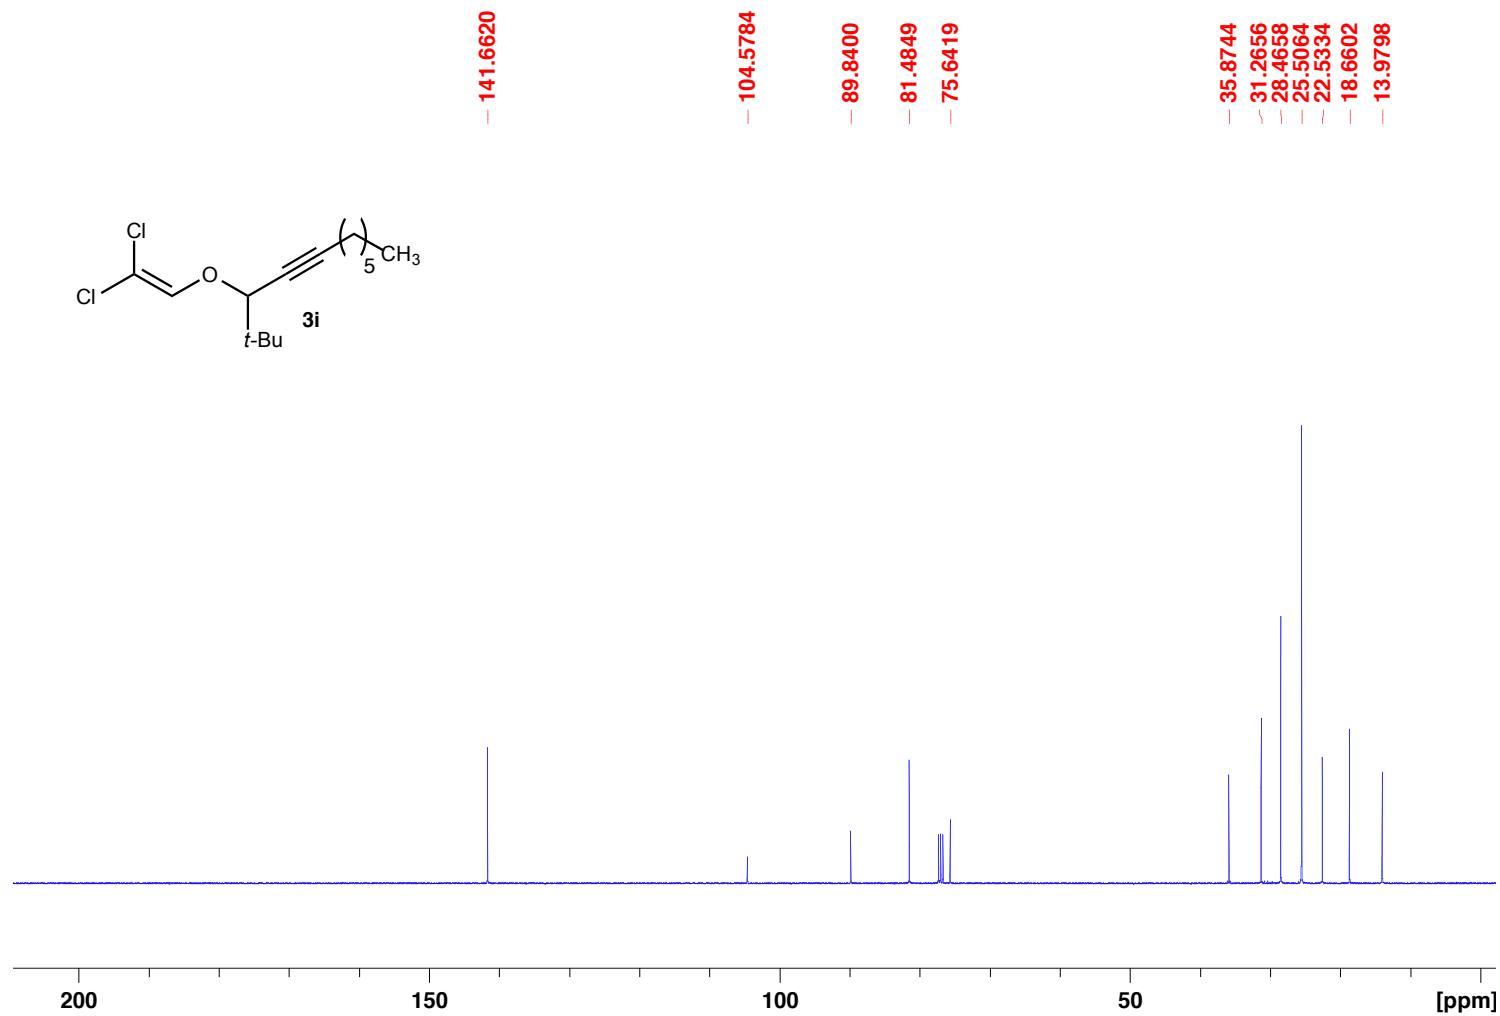

$^1\text{H}$  NMR (400 MHz),  $\text{CDCl}_3$ , as an inseparable 5:1 mixture of **4a** and **5a**.

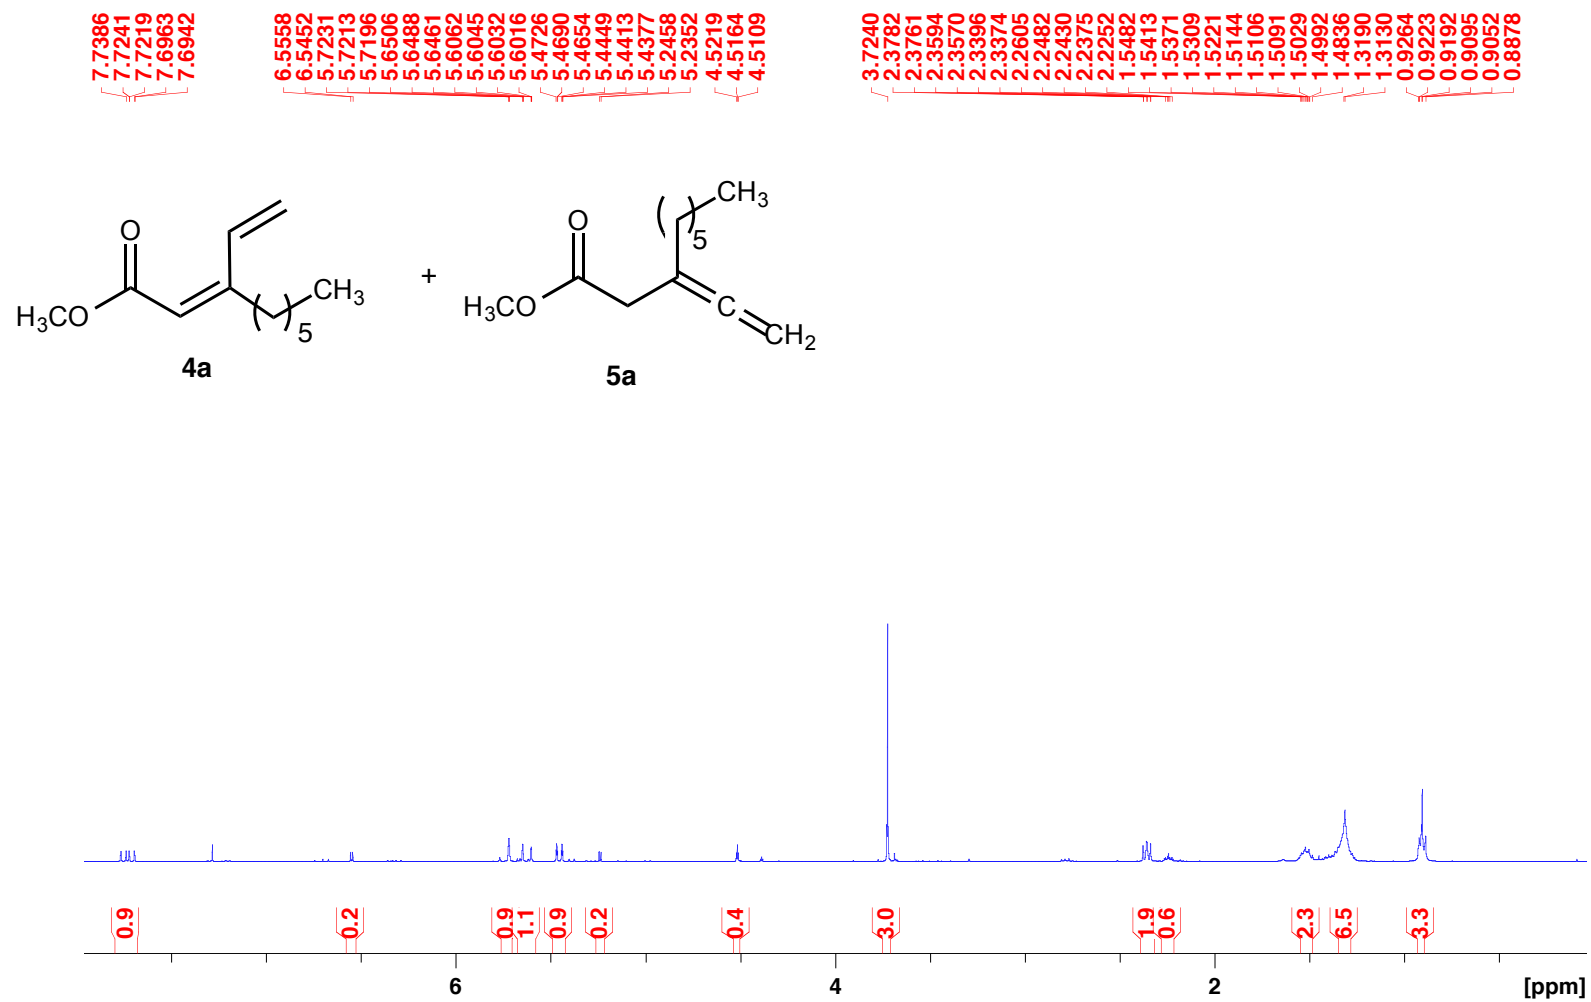



$^{13}\text{C}\{^1\text{H}\}$  NMR (100 MHz),  $\text{CDCl}_3$  as an inseparable 5:1 mixture of **4a** and **5a**.

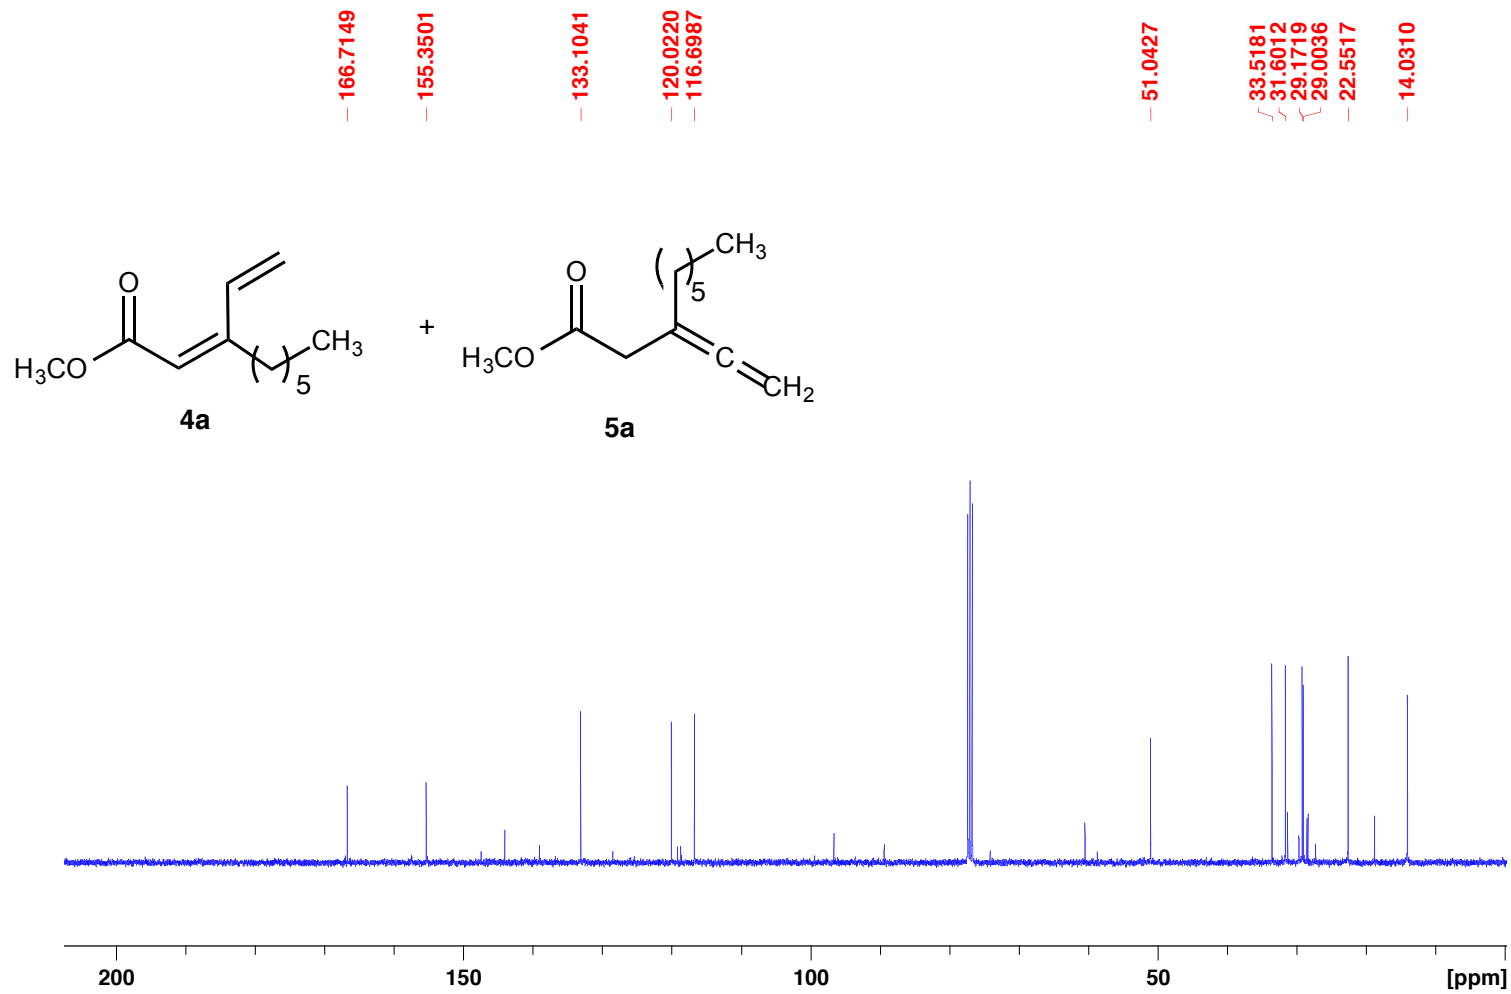

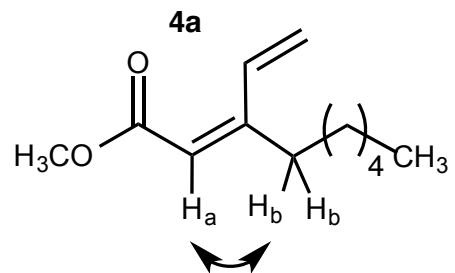

NOESY

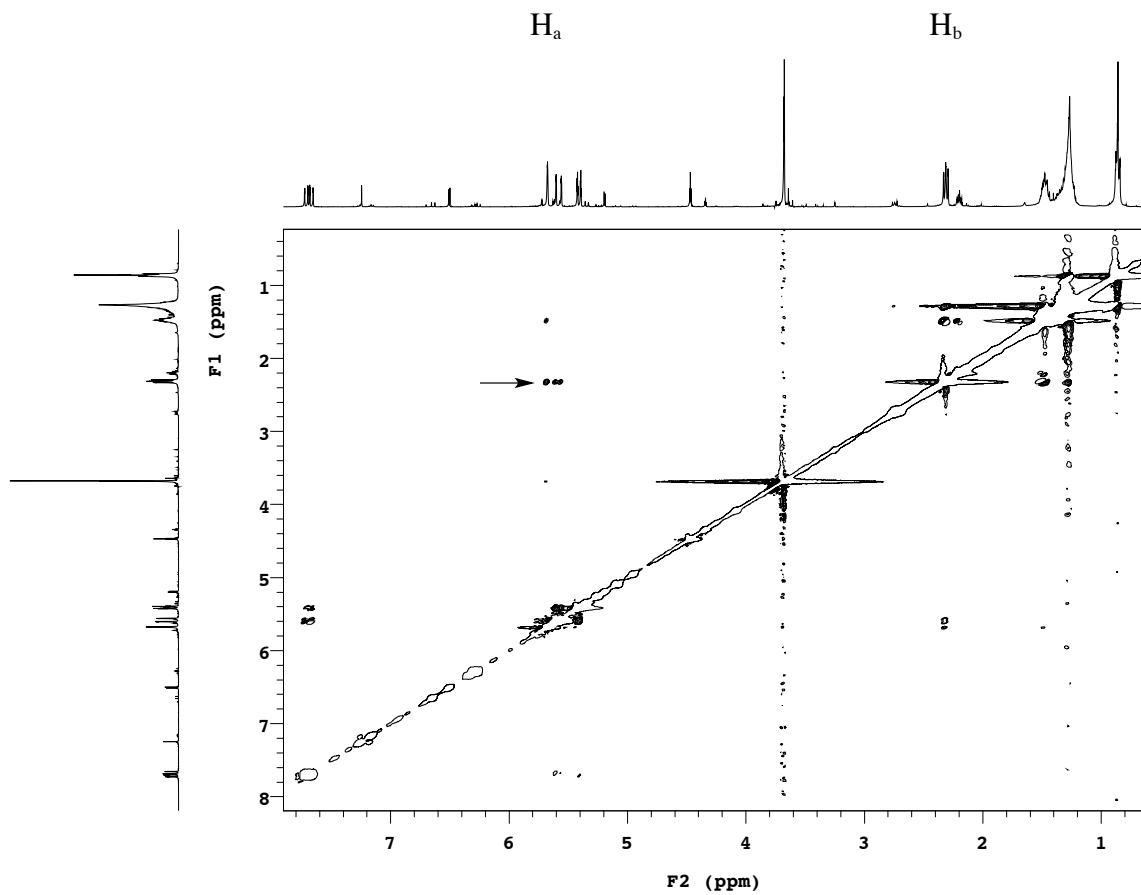

$^1\text{H}$  NMR (400 MHz),  $\text{CDCl}_3$ , as an inseparable 5:1 mixture of *E* and *Z* stereoisomers.

7.6992  
7.6973  
7.6827  
7.6809  
7.6546  
7.6528

5.7048  
5.7033  
5.6530  
5.6085  
5.4396  
5.4362  
5.4329  
5.4115  
5.4082  
5.4048

3.7259

2.5424  
2.5361  
2.5131  
2.5076  
2.4897  
2.4839  
1.8473  
1.8195  
1.3836  
1.3501  
1.3266  
1.3201  
1.2762  
1.2640  
1.2402  
1.2335  
1.2257  
1.2091  
1.2019

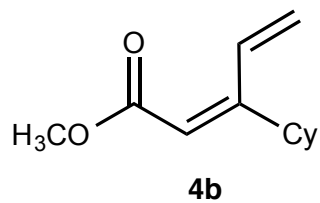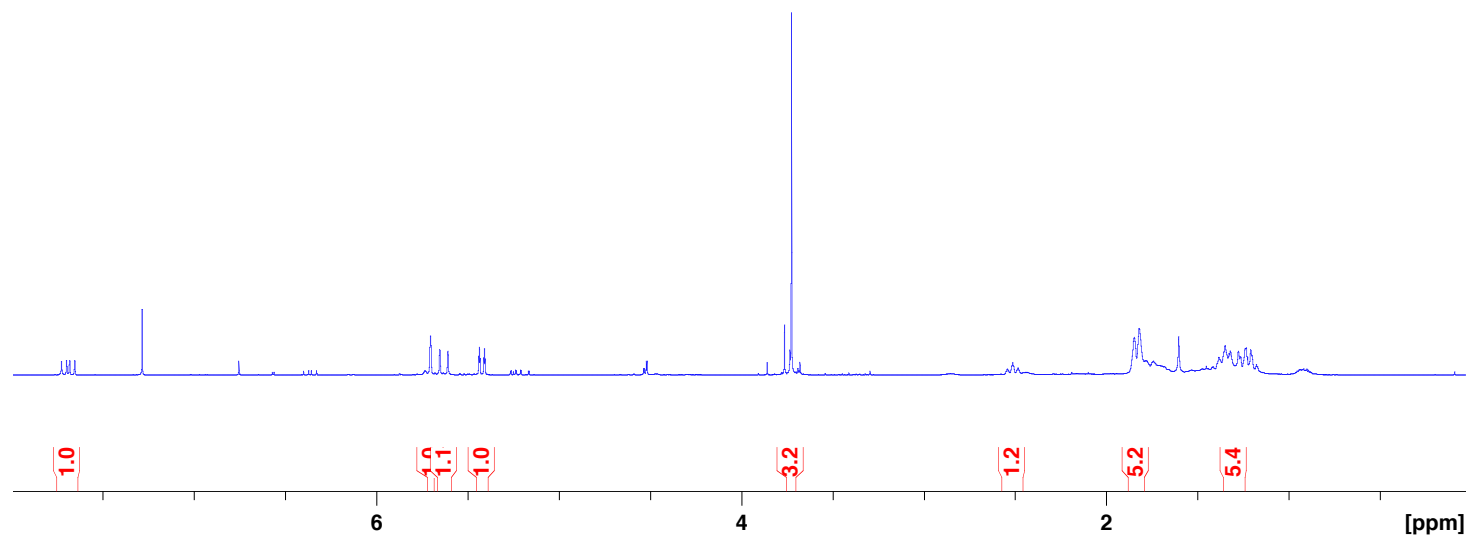

$^{13}\text{C}\{^1\text{H}\}$  NMR (100 MHz),  $\text{CDCl}_3$  as an inseparable 5:1 mixture of *E* and *Z* stereoisomers.

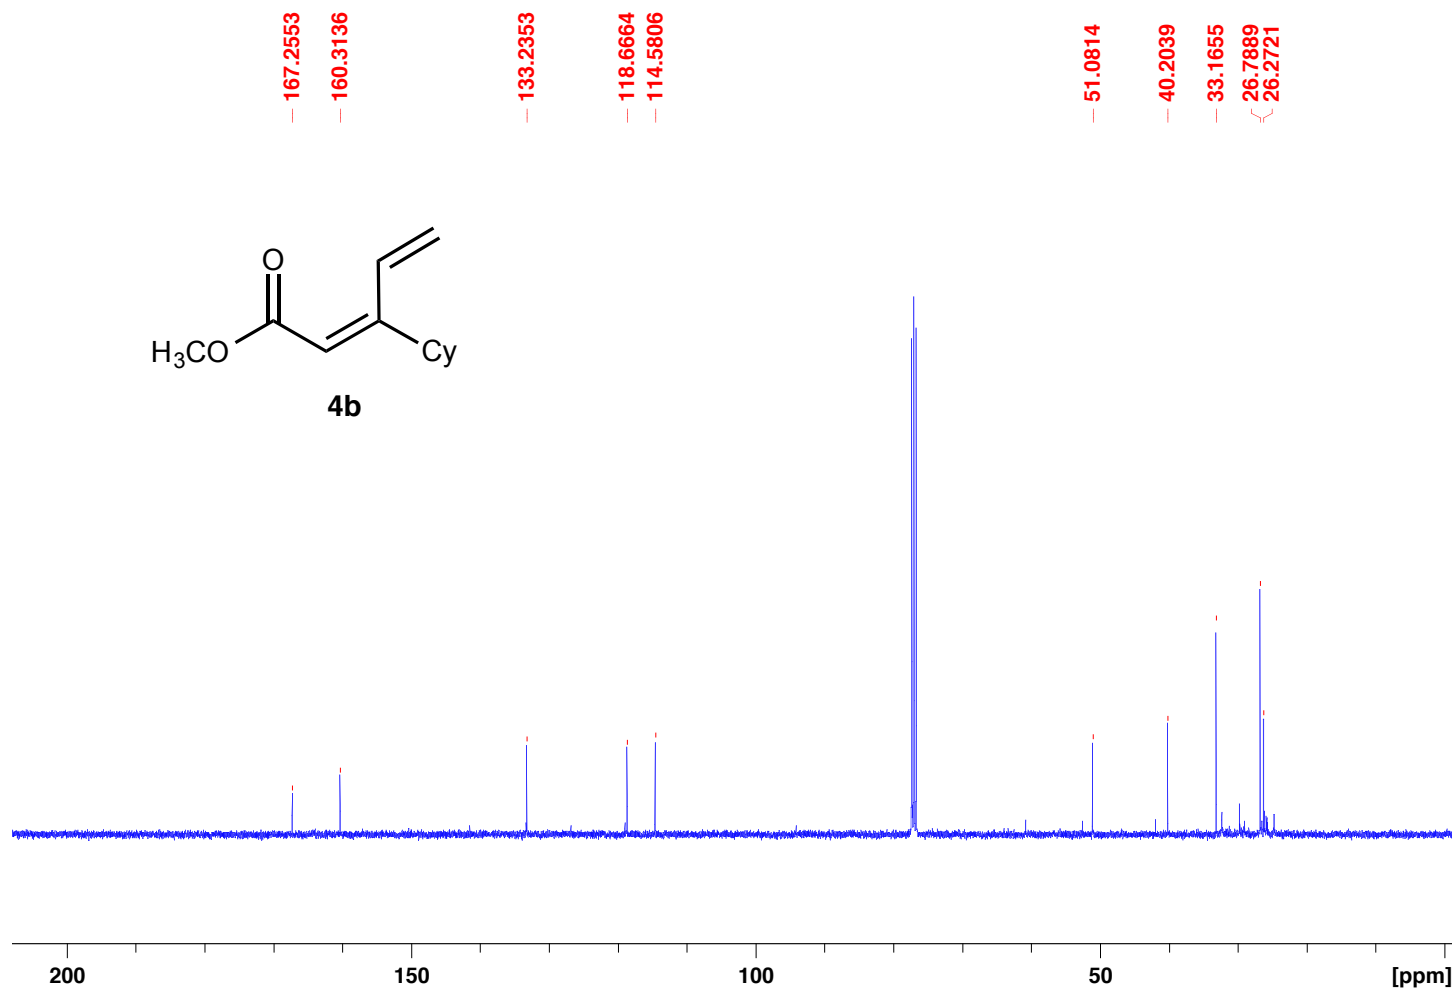

$^1\text{H}$  NMR (400 MHz),  $\text{CDCl}_3$ , as a >10:1 Z:E mixture of stereoisomers at the  $\alpha,\beta$ -alkene

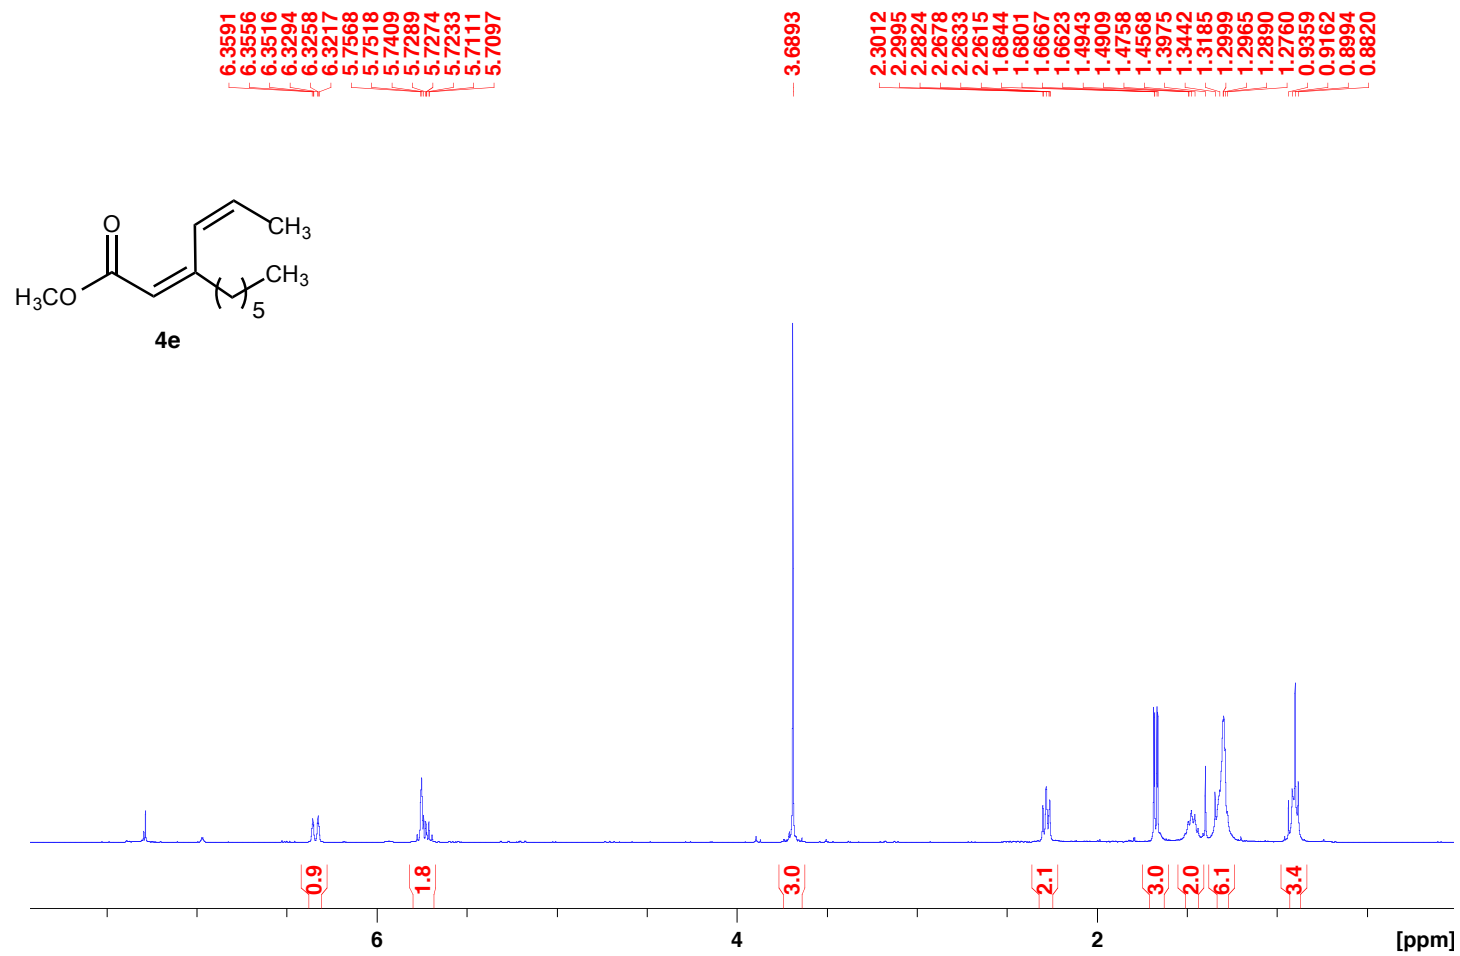

$^{13}\text{C}\{^1\text{H}\}$  NMR (100 MHz),  $\text{CDCl}_3$ , as a >10:1 Z:E mixture of stereoisomers at the  $\alpha,\beta$ -alkene

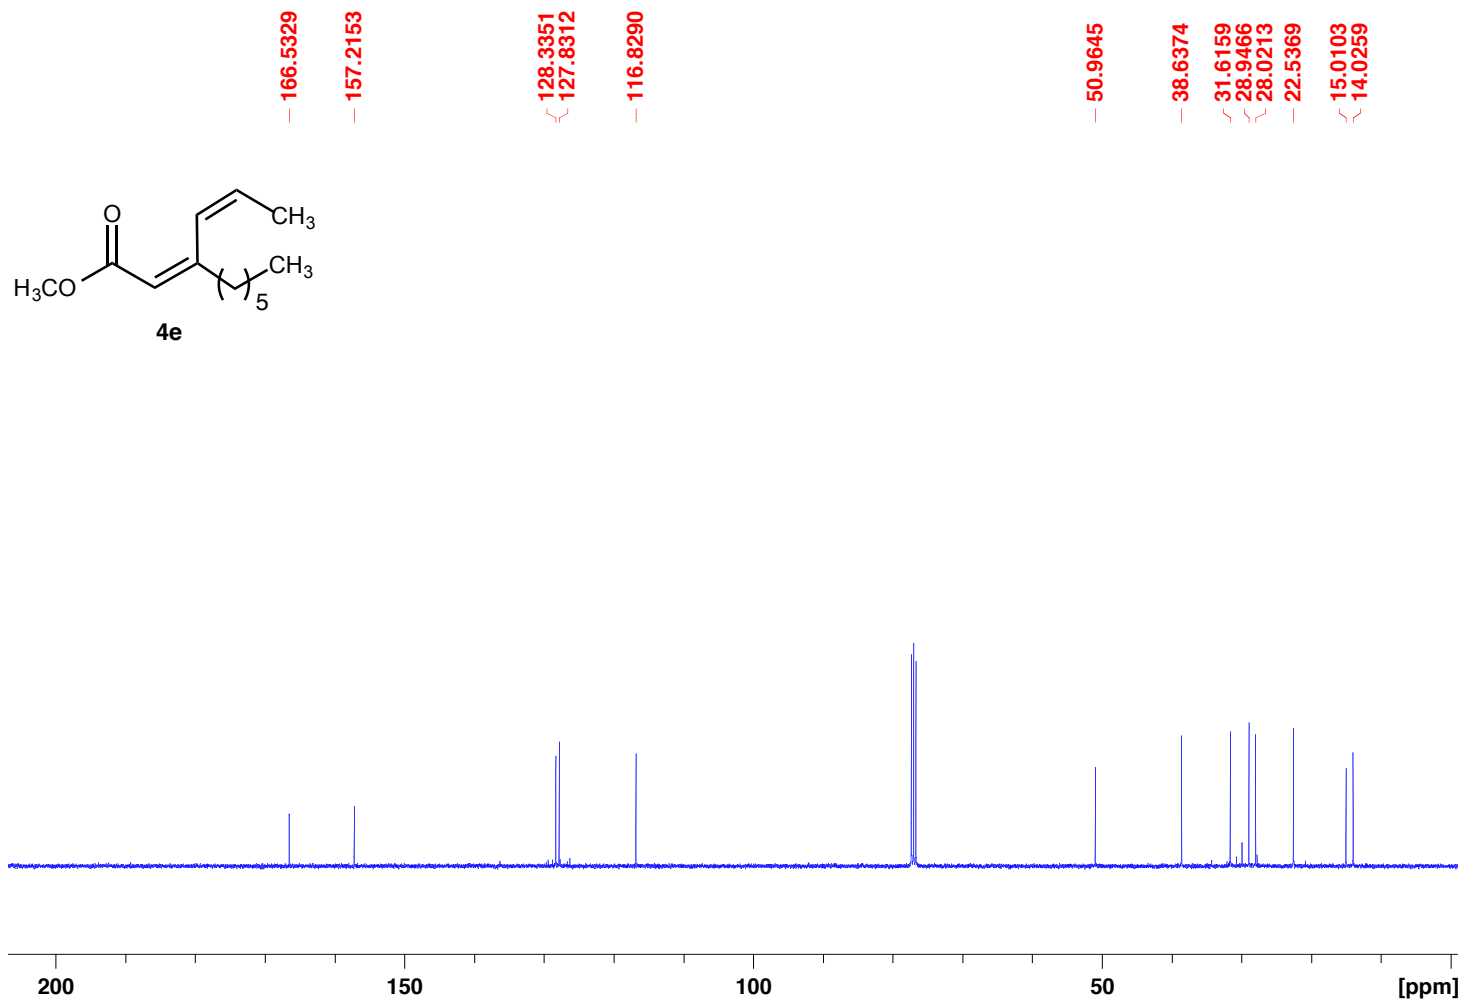

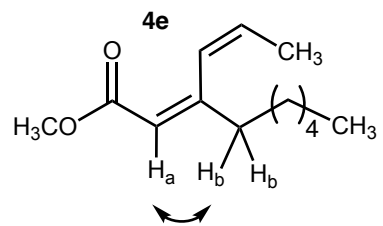

NOESY

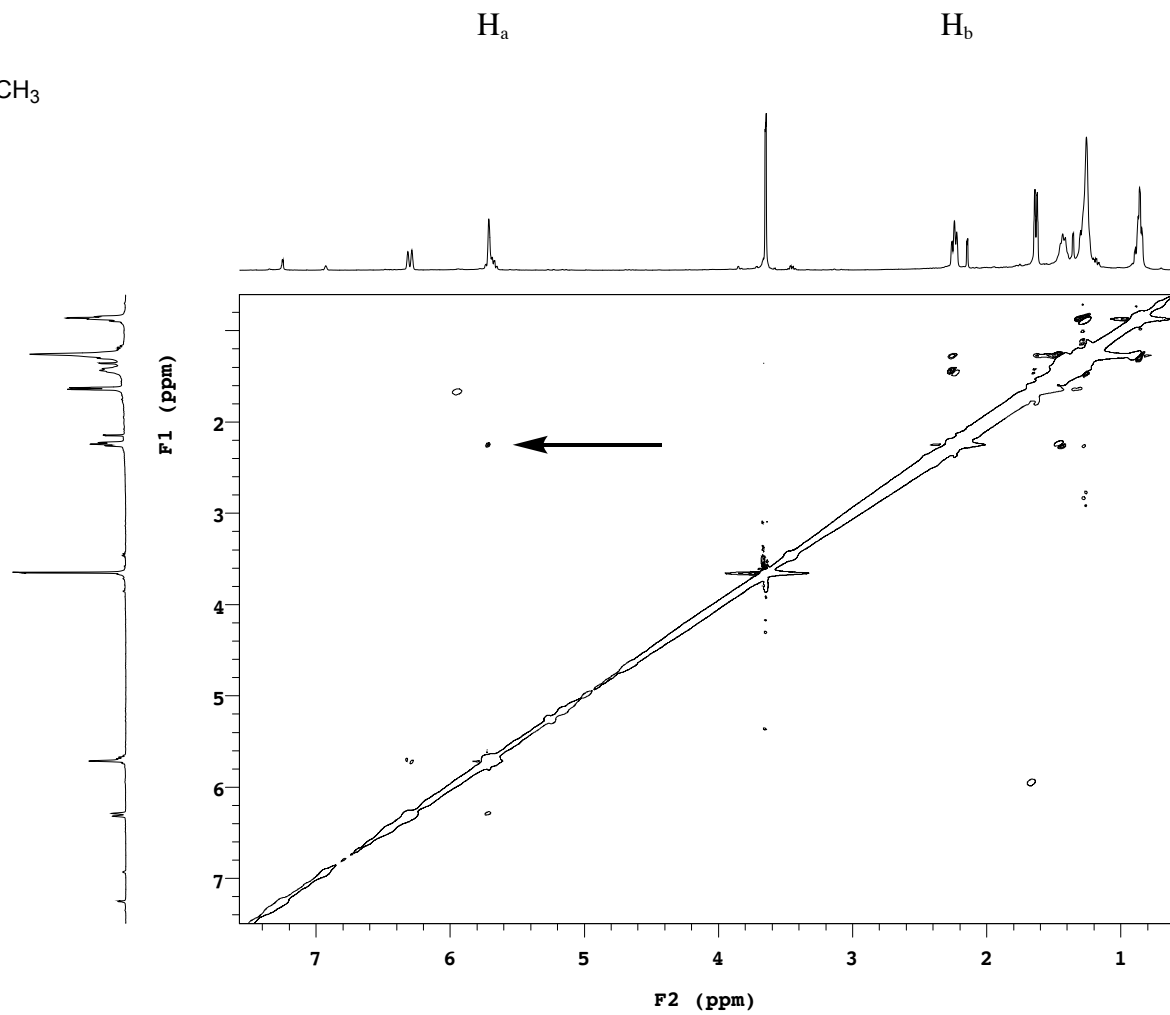

$^1\text{H}$  NMR (400 MHz),  $\text{CDCl}_3$ , as a >10:1 Z:E mixture of stereoisomers at the  $\alpha,\beta$ -alkene

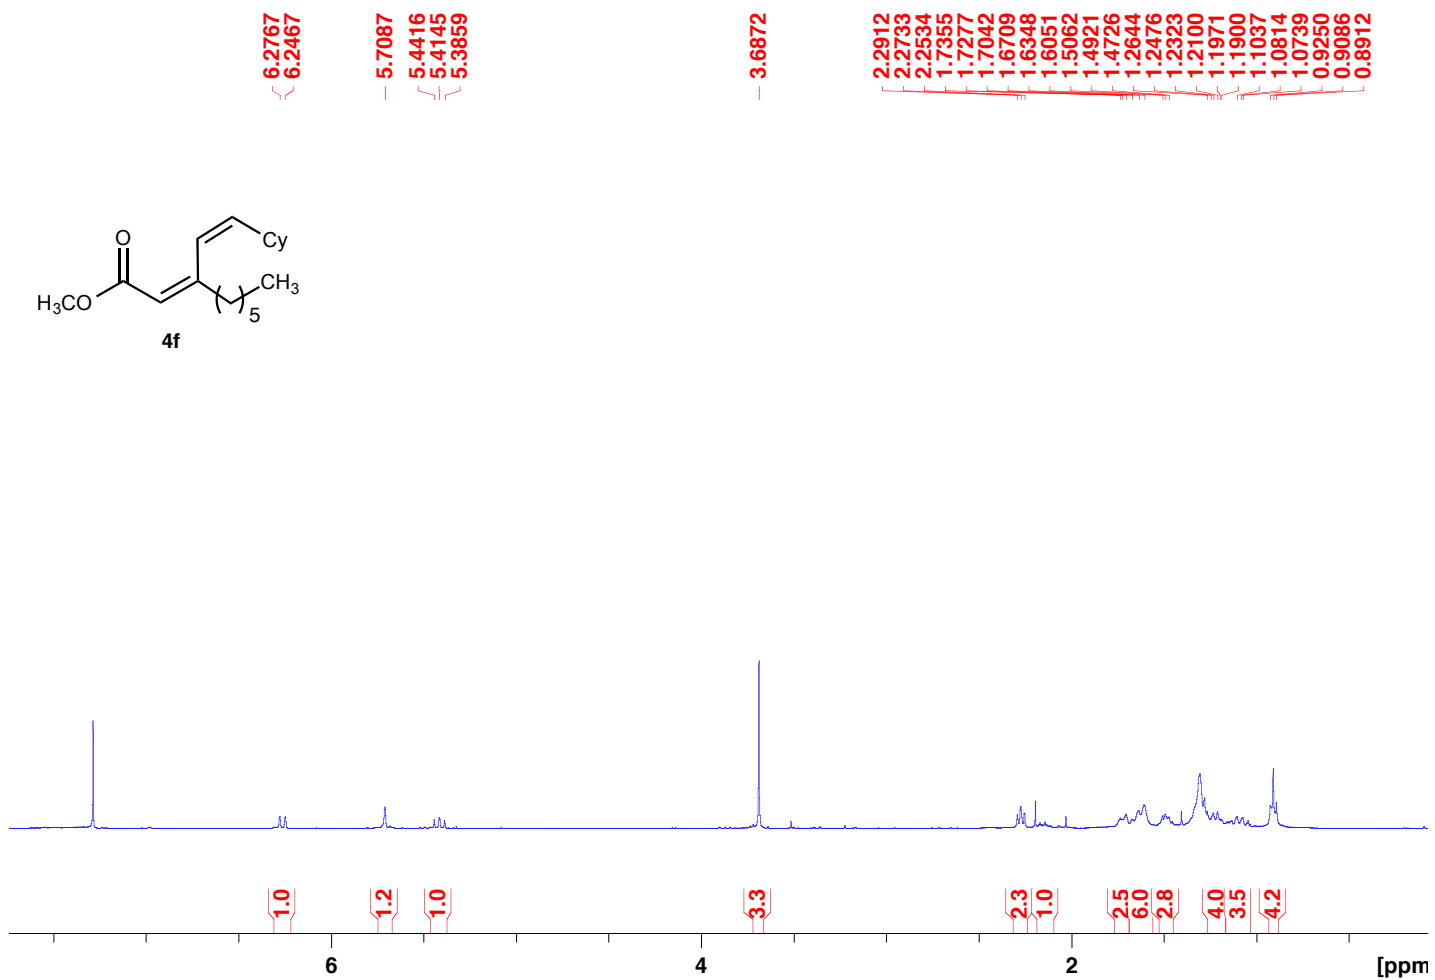



$^{13}\text{C}\{^1\text{H}\}$  NMR (100 MHz),  $\text{CDCl}_3$ , as a >10:1 Z:E mixture of stereoisomers at the  $\alpha,\beta$ -alkene

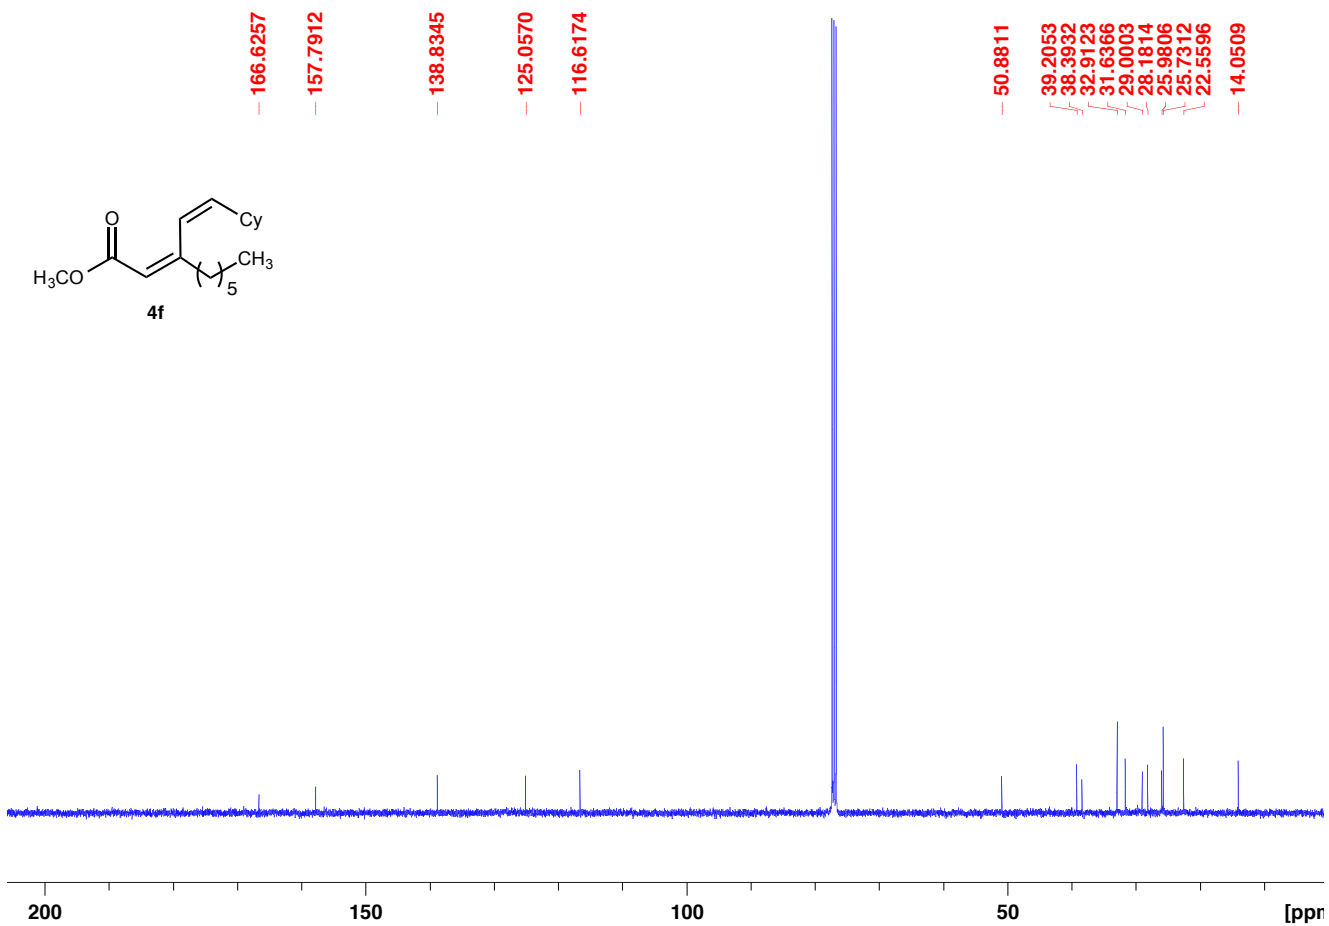

$^1\text{H}$  NMR (400 MHz),  $\text{CDCl}_3$ , as a 2.3:1 mixture of *Z* and *E* stereoisomers ( $\gamma,\delta$ -olefin)

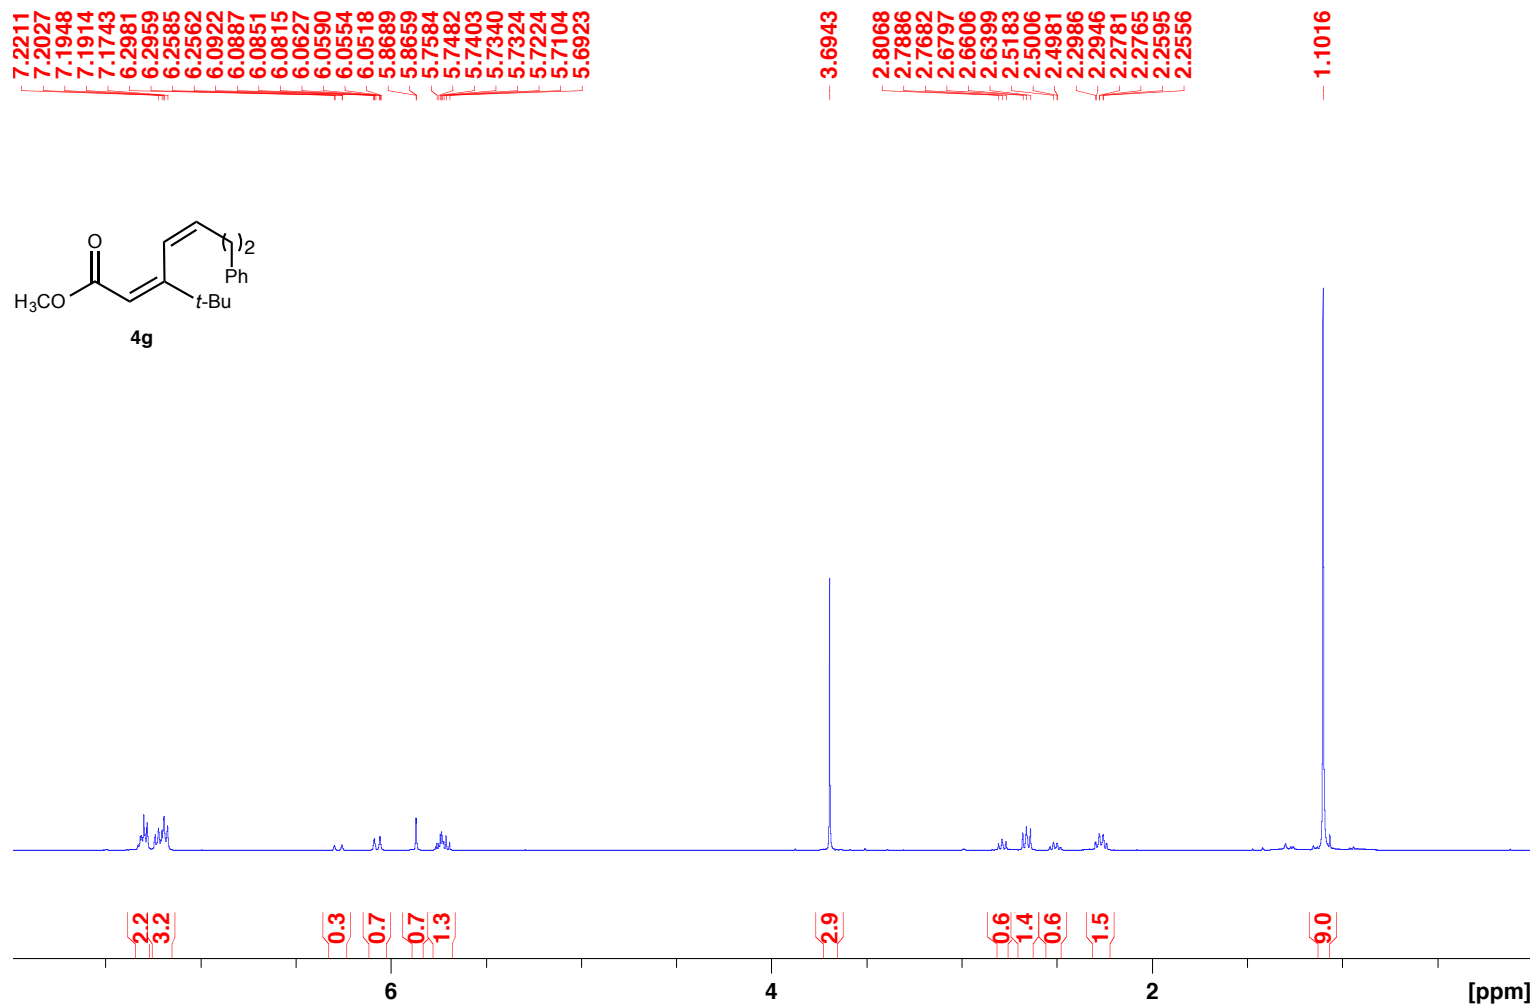

$^{13}\text{C}\{^1\text{H}\}$  NMR (100 MHz),  $\text{CDCl}_3$ , as a 2.3:1 mixture of *Z* and *E* stereoisomers

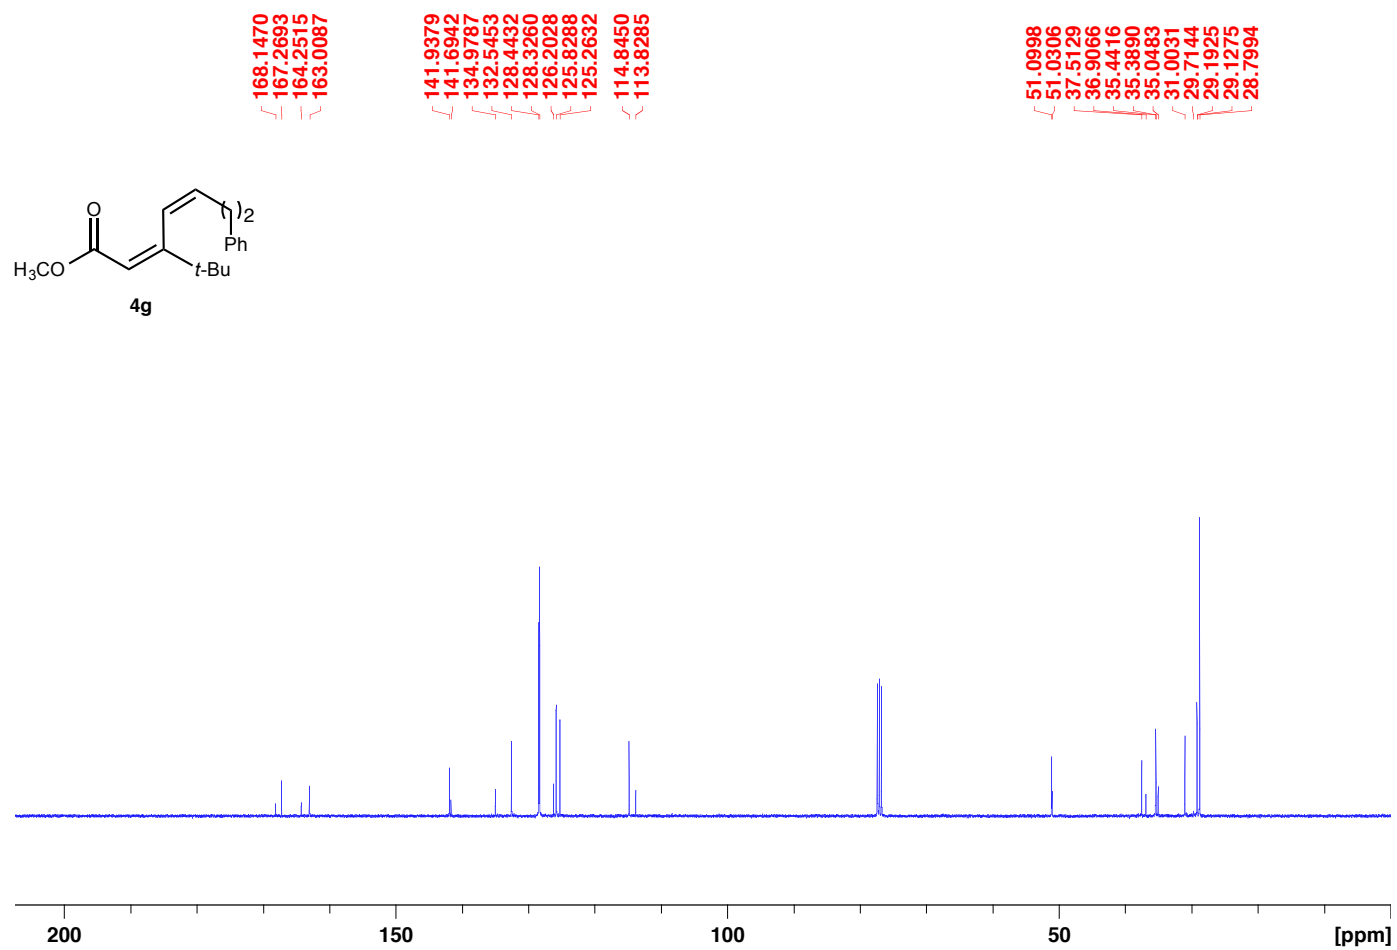

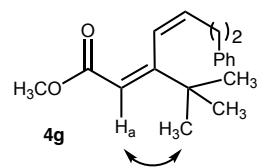

NOESY

H<sub>a</sub>

*t*-Bu

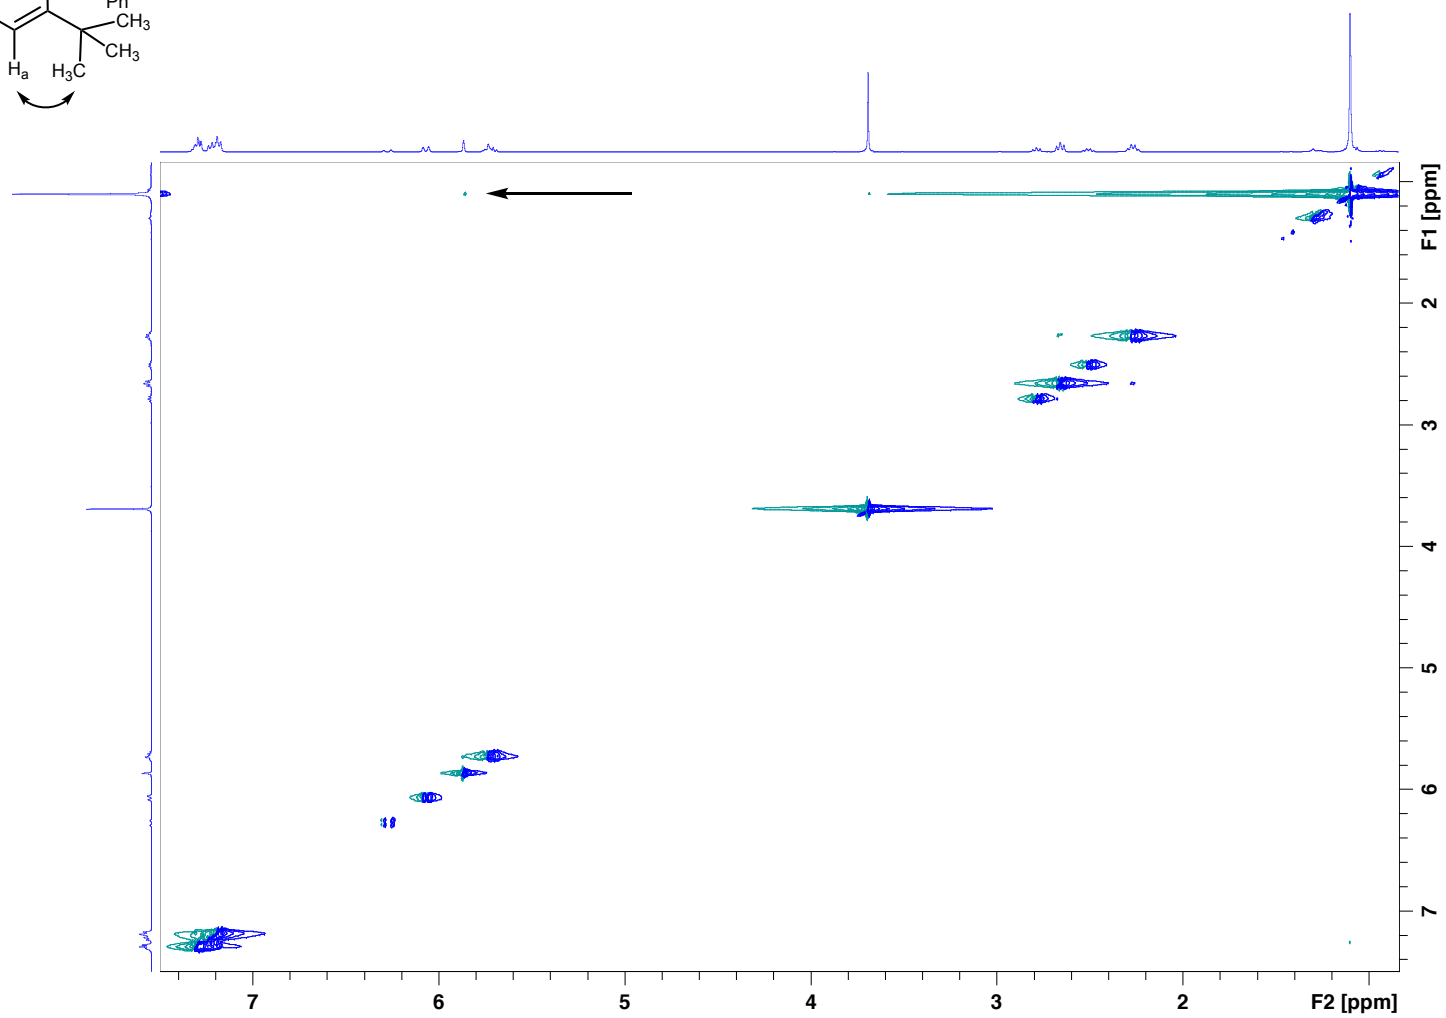

$^1\text{H}$  NMR (400 MHz),  $\text{CDCl}_3$ , as a >10:1 Z:E mixture of stereoisomers at the  $\alpha,\beta$ -alkene

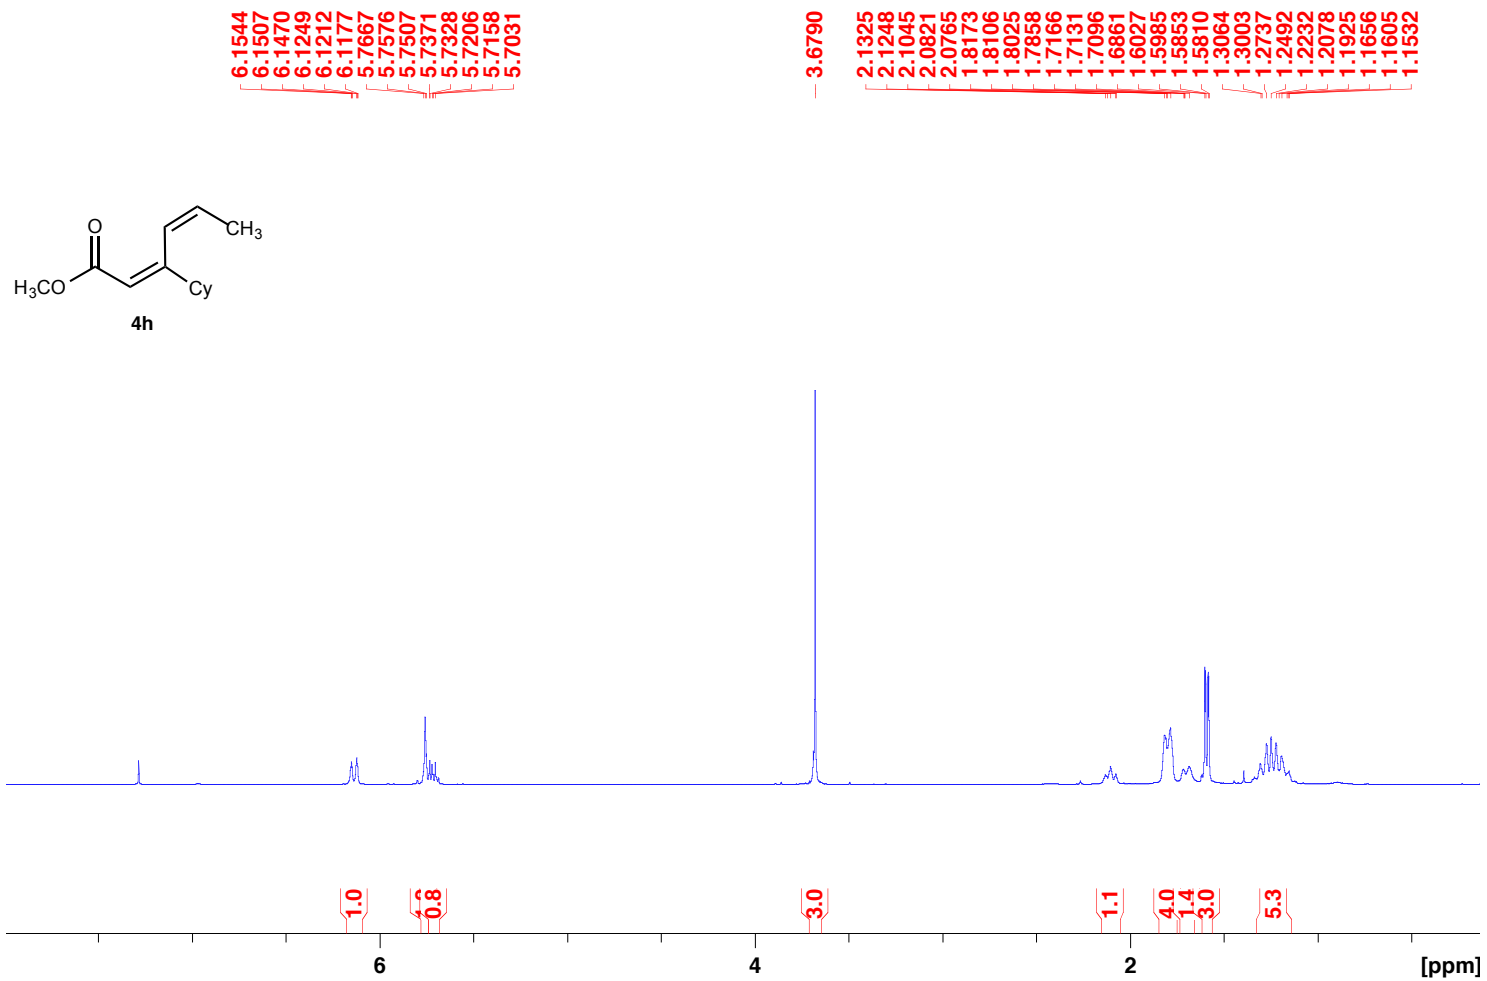

$^{13}\text{C}\{^1\text{H}\}$  NMR (100 MHz),  $\text{CDCl}_3$ , as a >10:1 Z:E mixture of stereoisomers at the  $\alpha,\beta$ -alkene

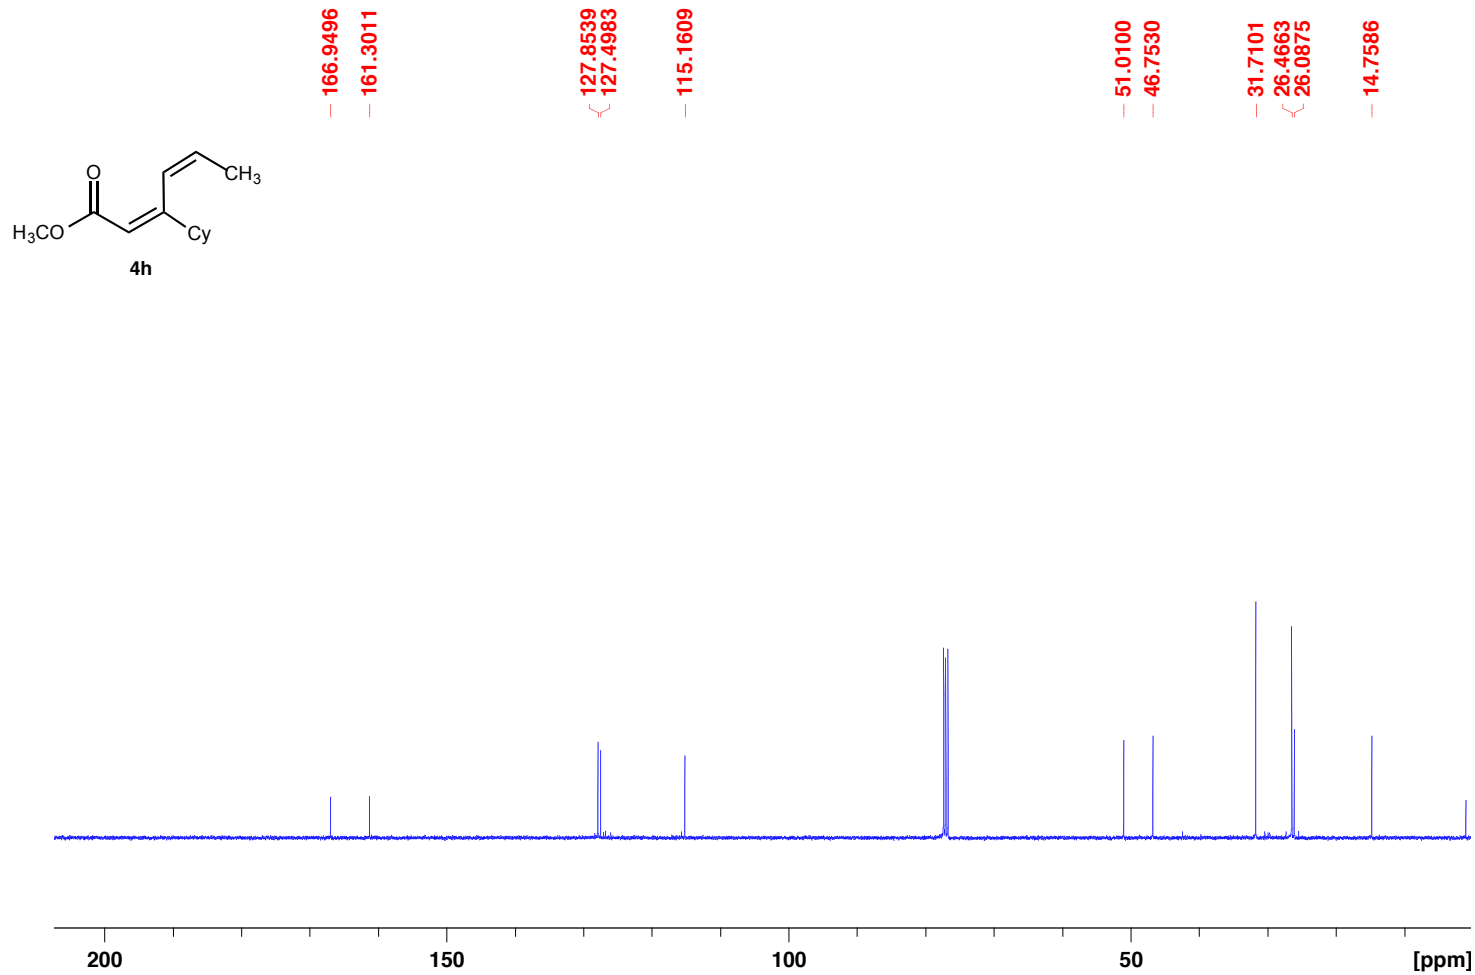

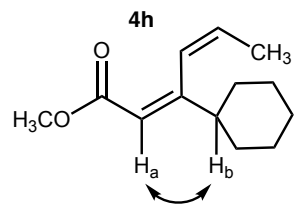

NOESY

H<sub>a</sub>

H<sub>b</sub>

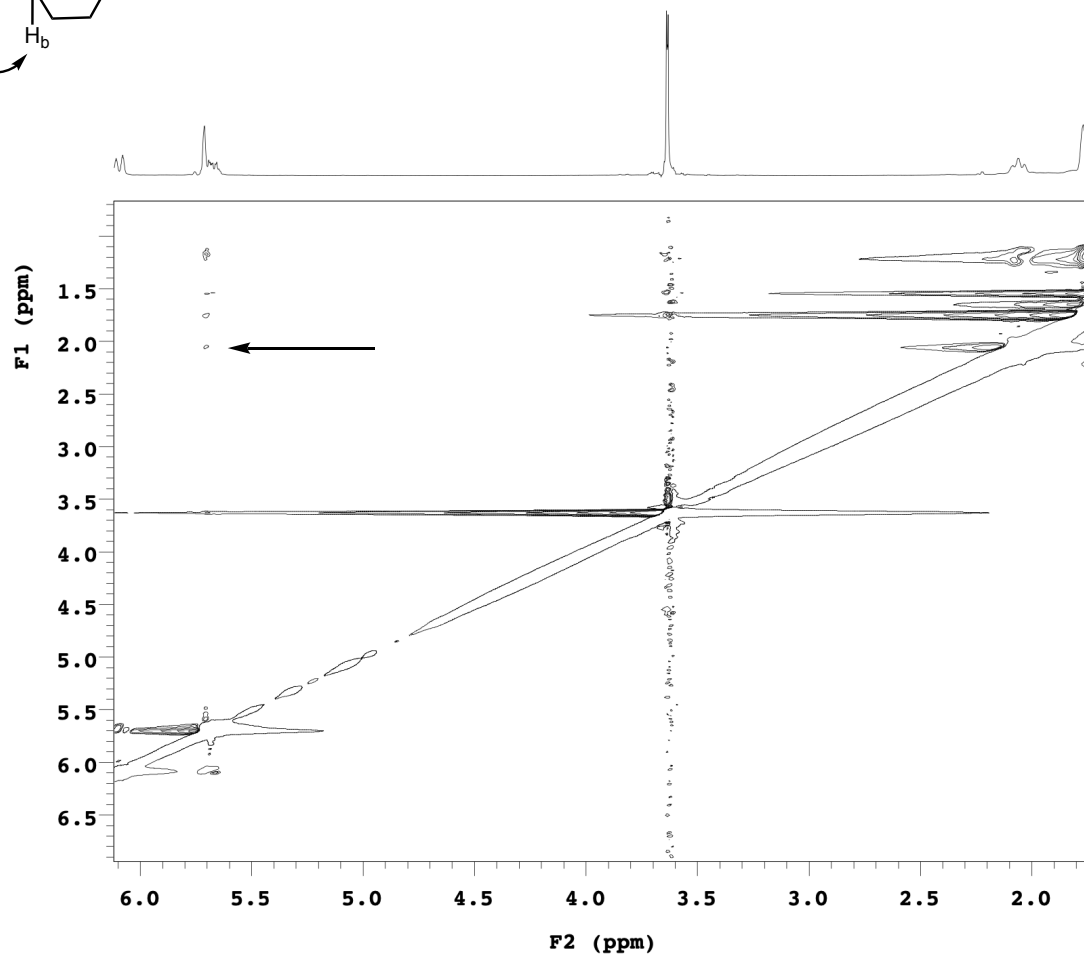

$^1\text{H}$  NMR (400 MHz),  $\text{CDCl}_3$ , as a >10:1 Z:E mixture of stereoisomers at the  $\alpha,\beta$ -alkene

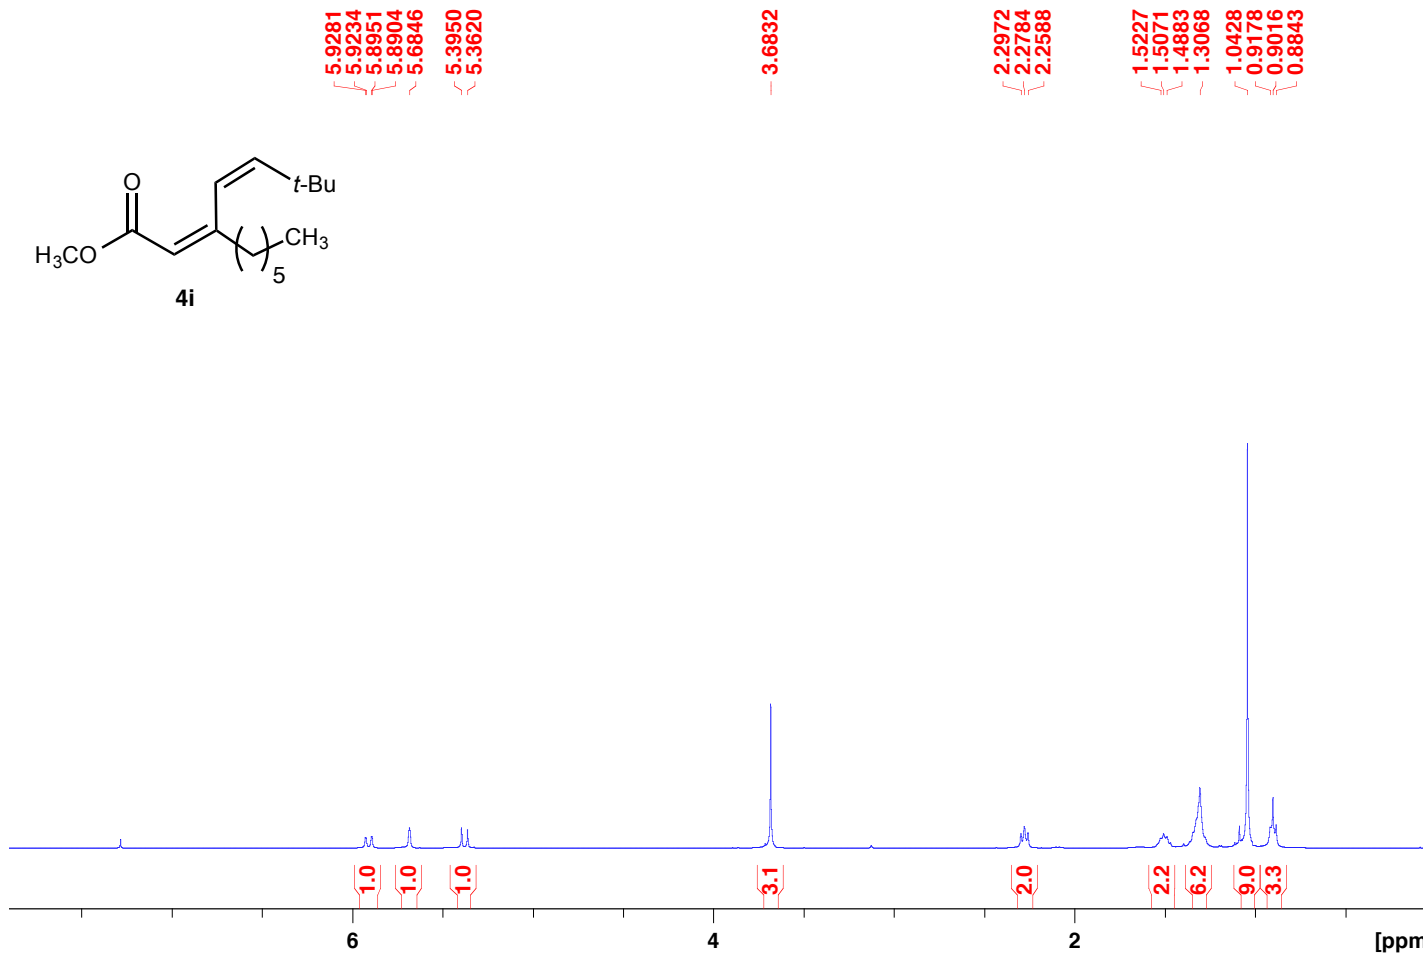



$^{13}\text{C}\{^1\text{H}\}$  NMR (100 MHz),  $\text{CDCl}_3$ , as a >10:1 Z:E mixture of stereoisomers at the  $\alpha,\beta$ -alkene

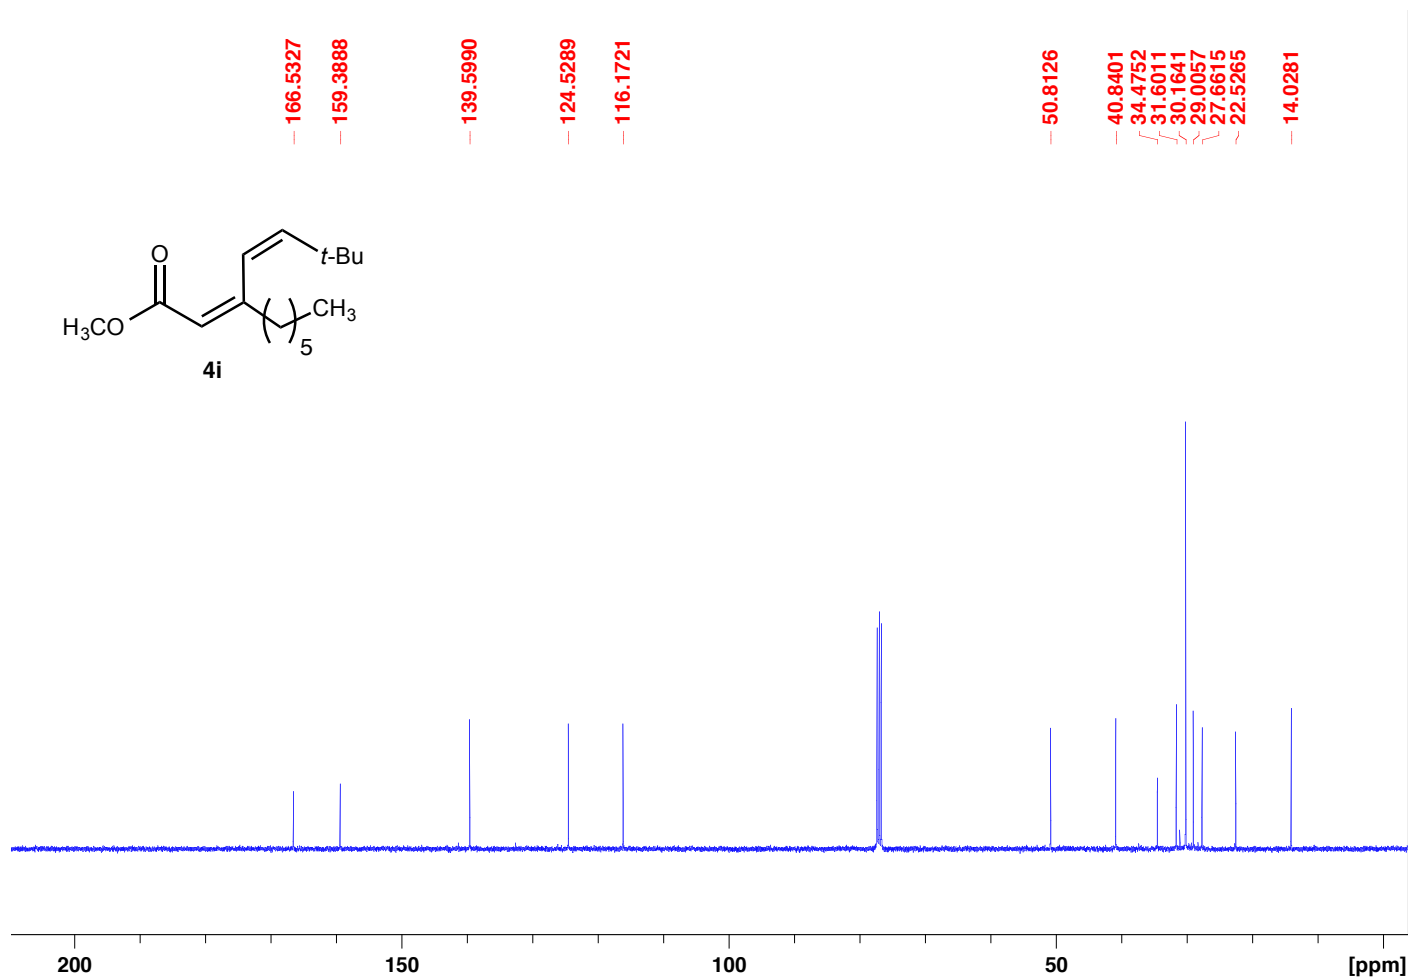

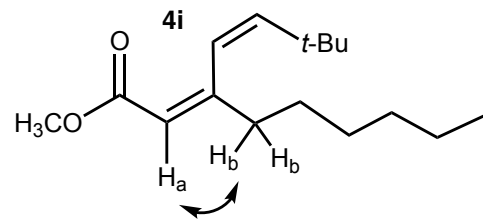

NOESY

H<sub>a</sub>

H<sub>b</sub>

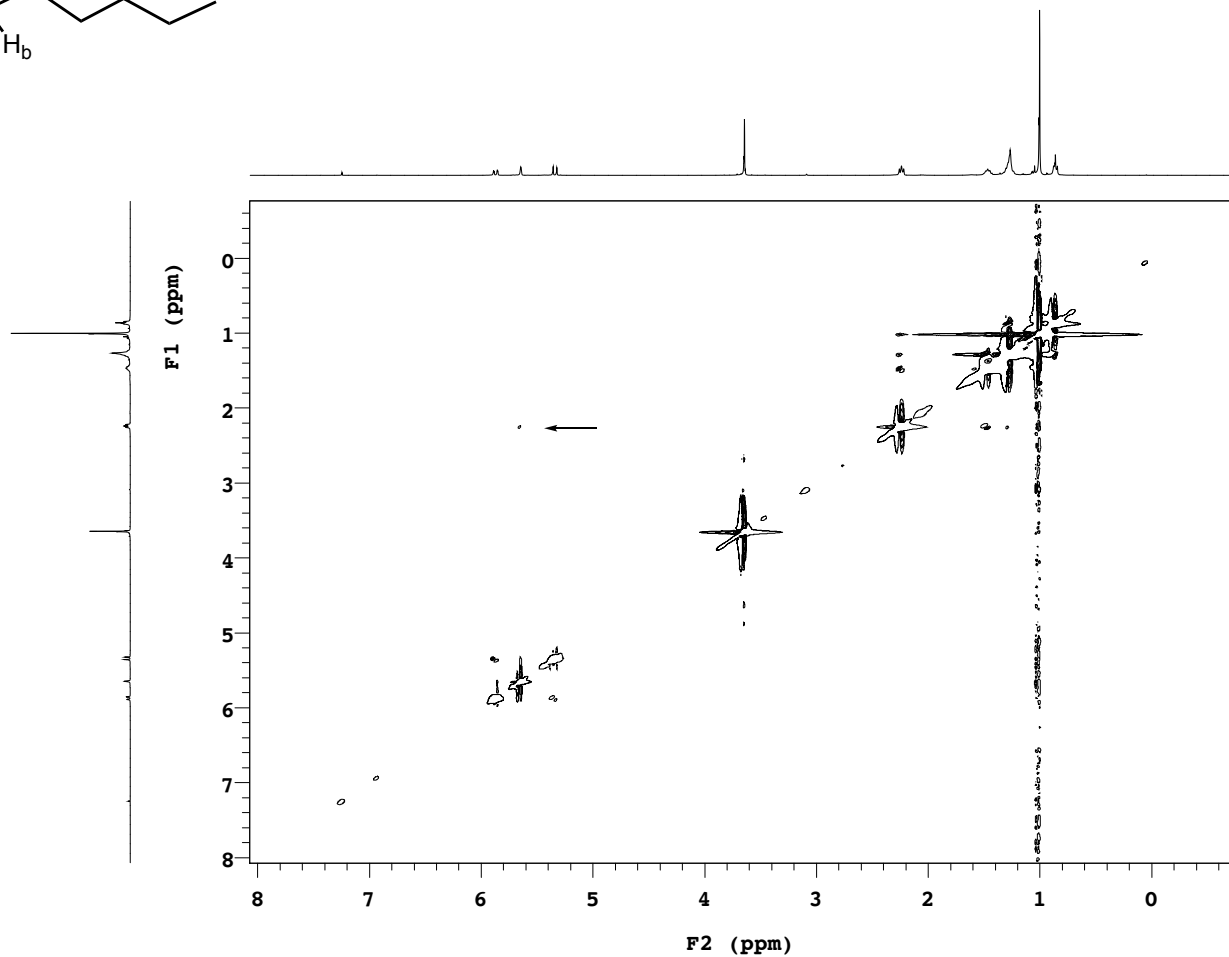

$^1\text{H}$  NMR (400 MHz),  $\text{CDCl}_3$

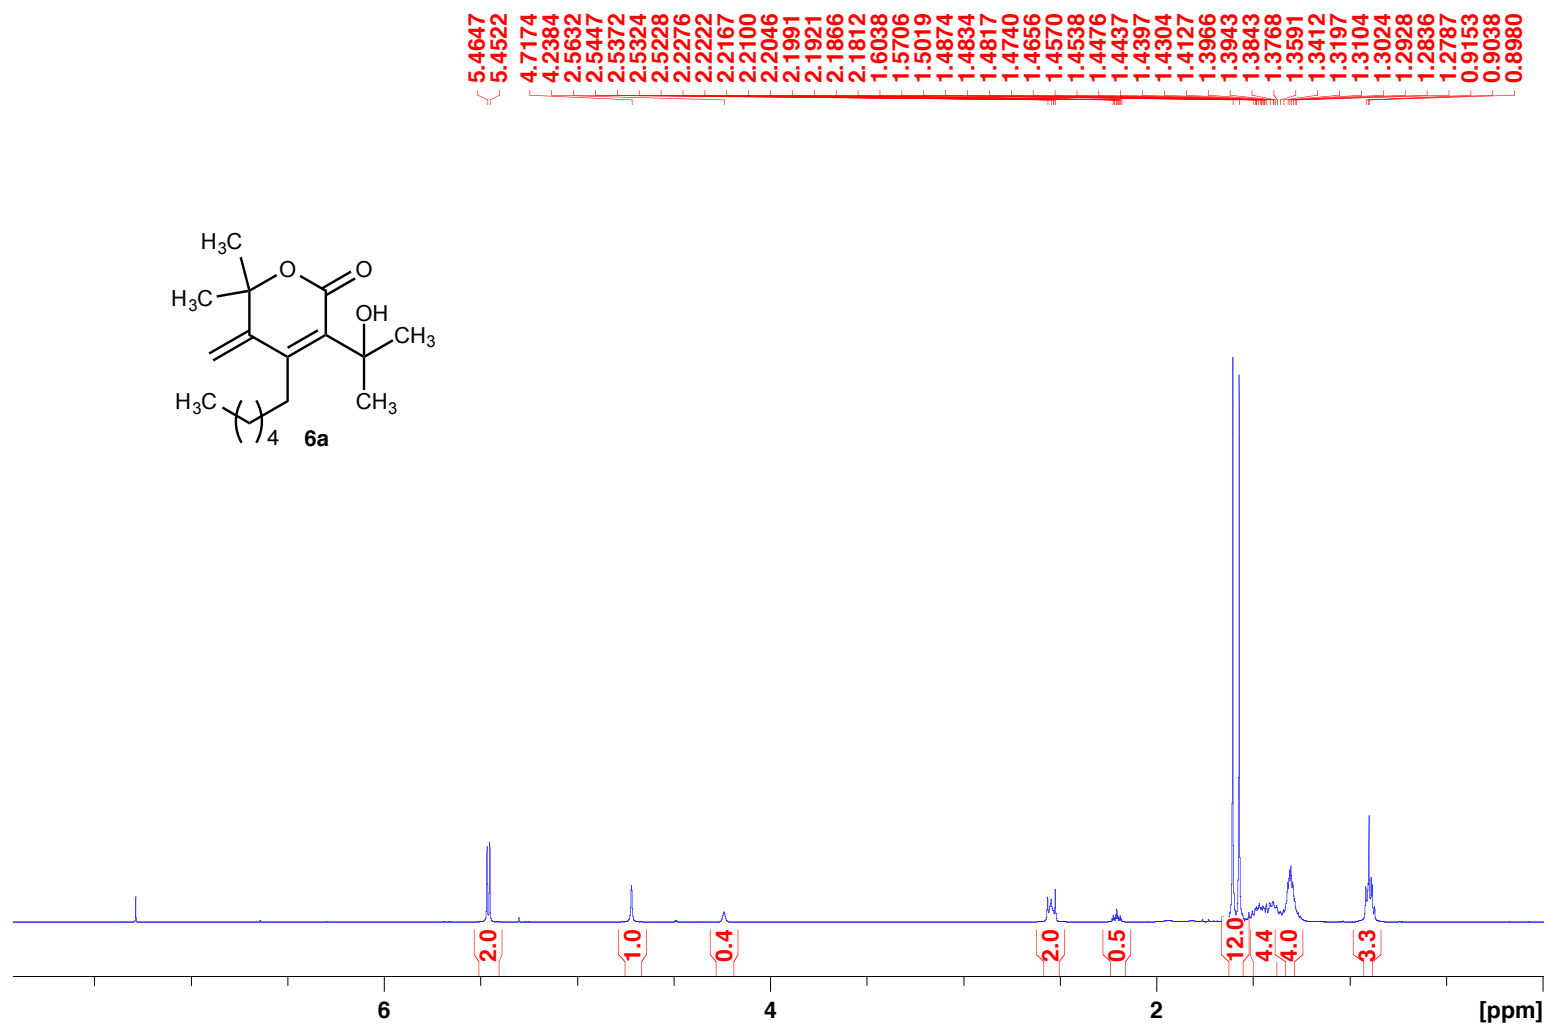

$^{13}\text{C}\{^1\text{H}\}$  NMR (100 MHz),  $\text{CDCl}_3$

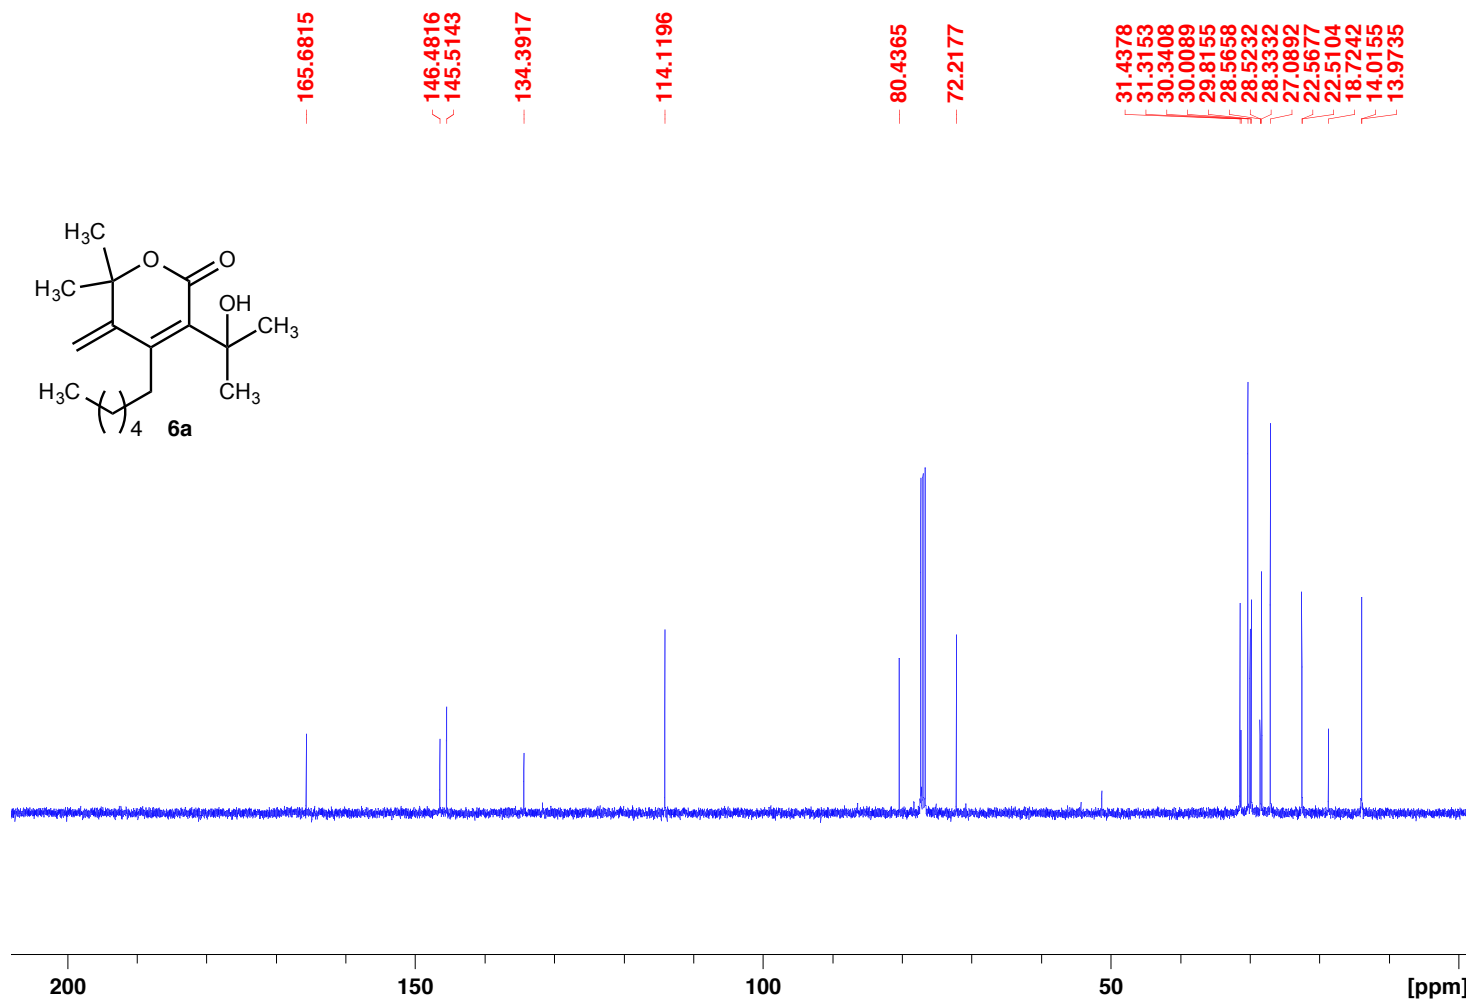

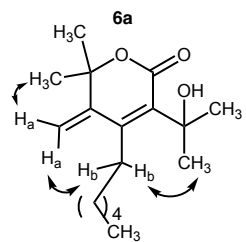

NOESY

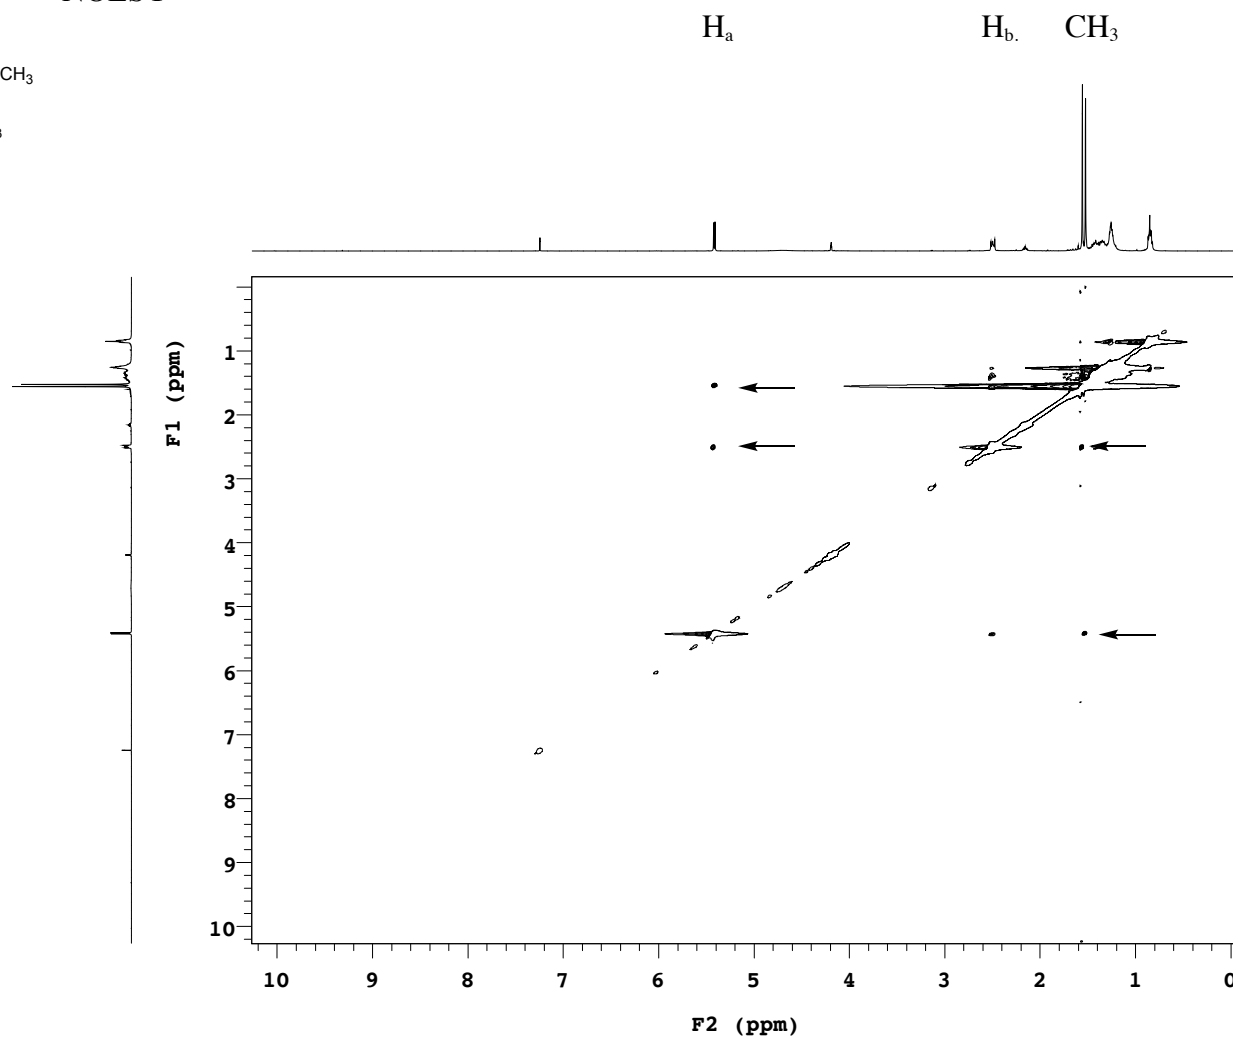

$^1\text{H}$  NMR (400 MHz),  $\text{CDCl}_3$ , as a separable 1:1 mixture of *syn* and *anti* diastereomers.

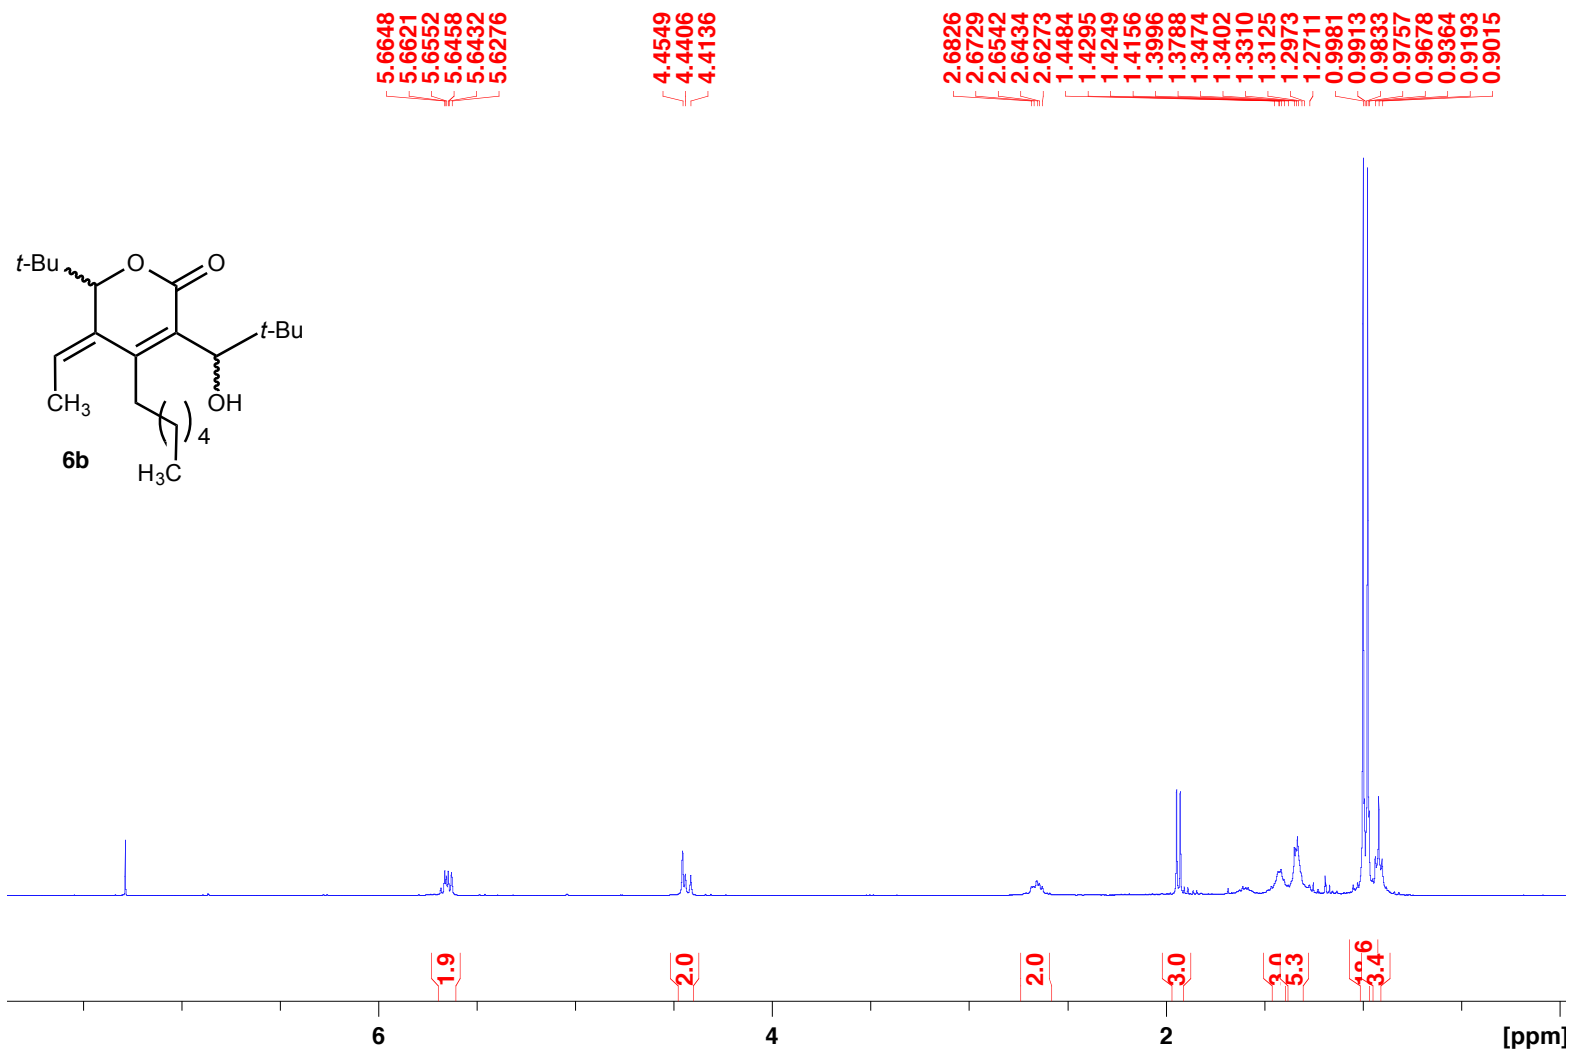

$^{13}\text{C}\{^1\text{H}\}$  NMR (100 MHz),  $\text{CDCl}_3$ , as a separable 1:1 mixture of *syn* and *anti* diastereomers.

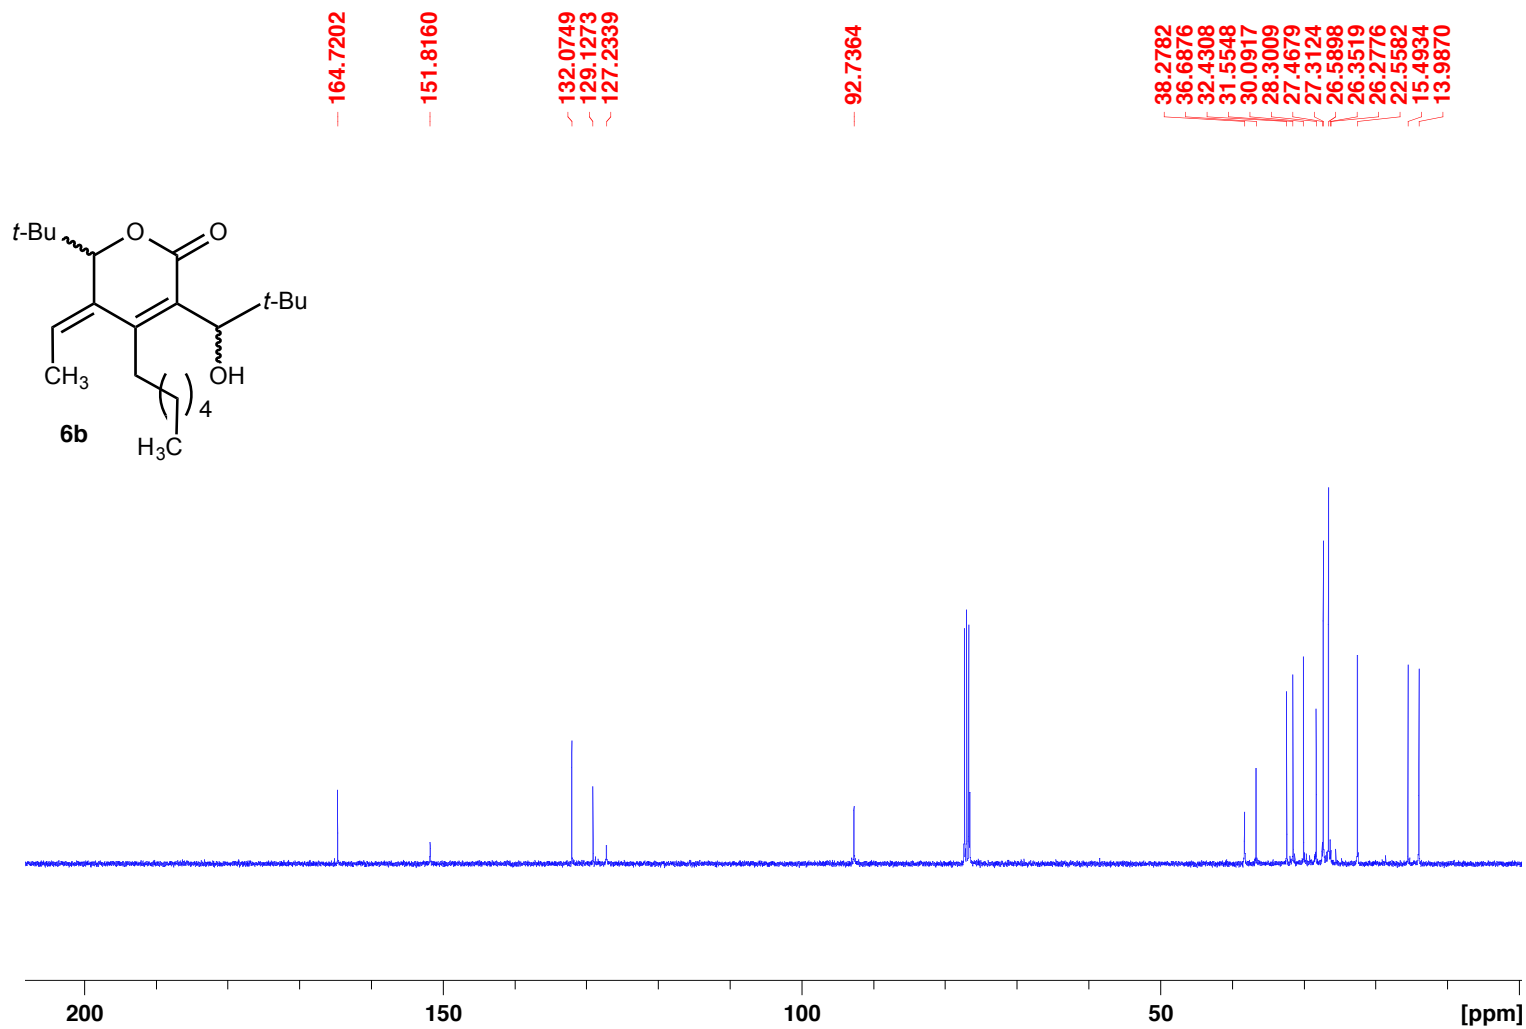

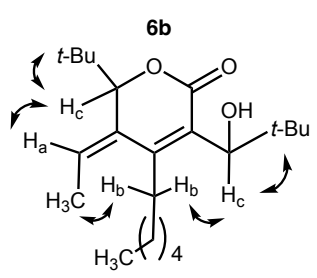

NOESY

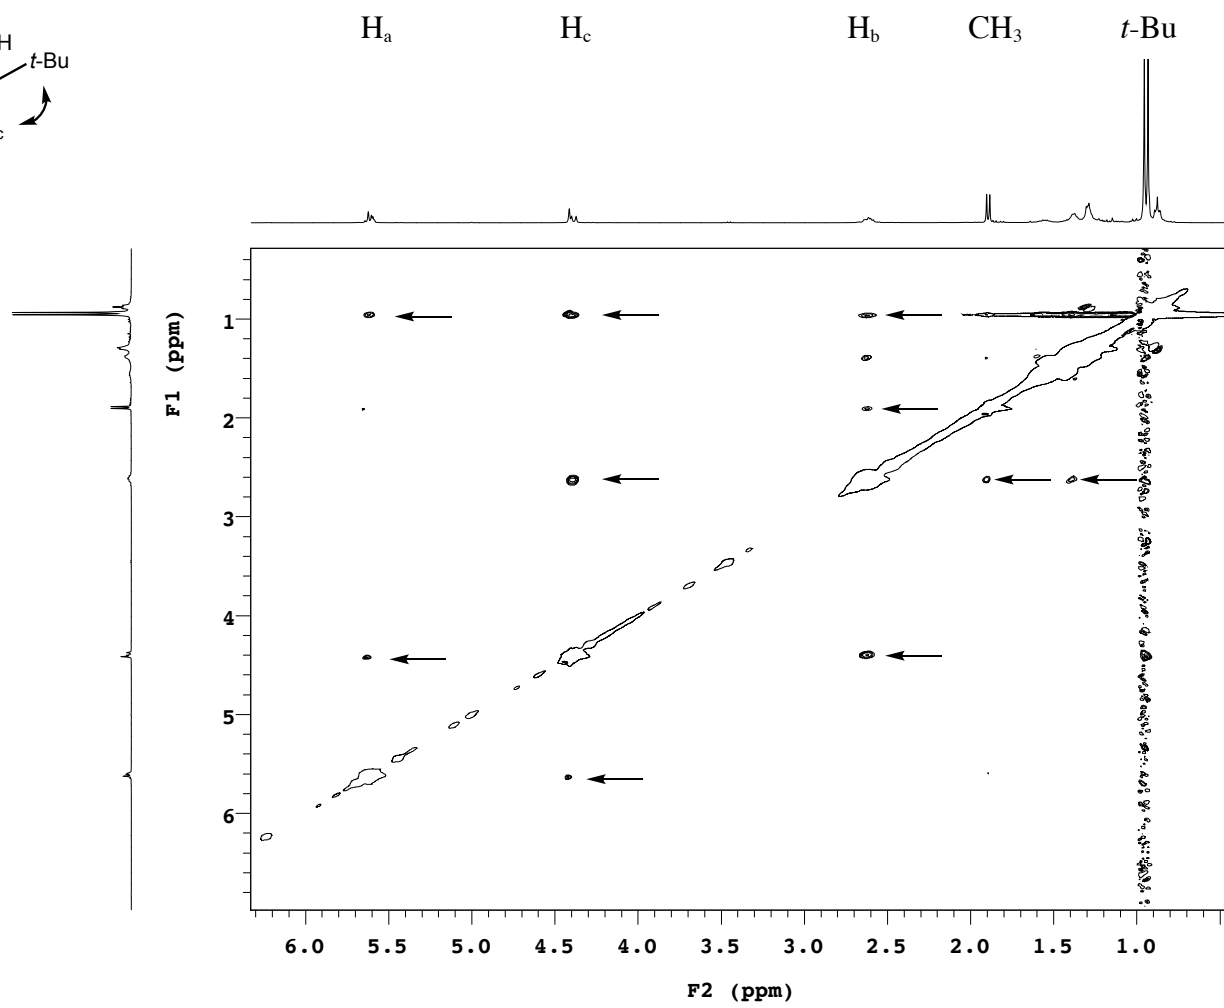



$^1\text{H}$  NMR (400 MHz),  $\text{CDCl}_3$ , as a separable 1:1 mixture of *syn* and *anti* diastereomers

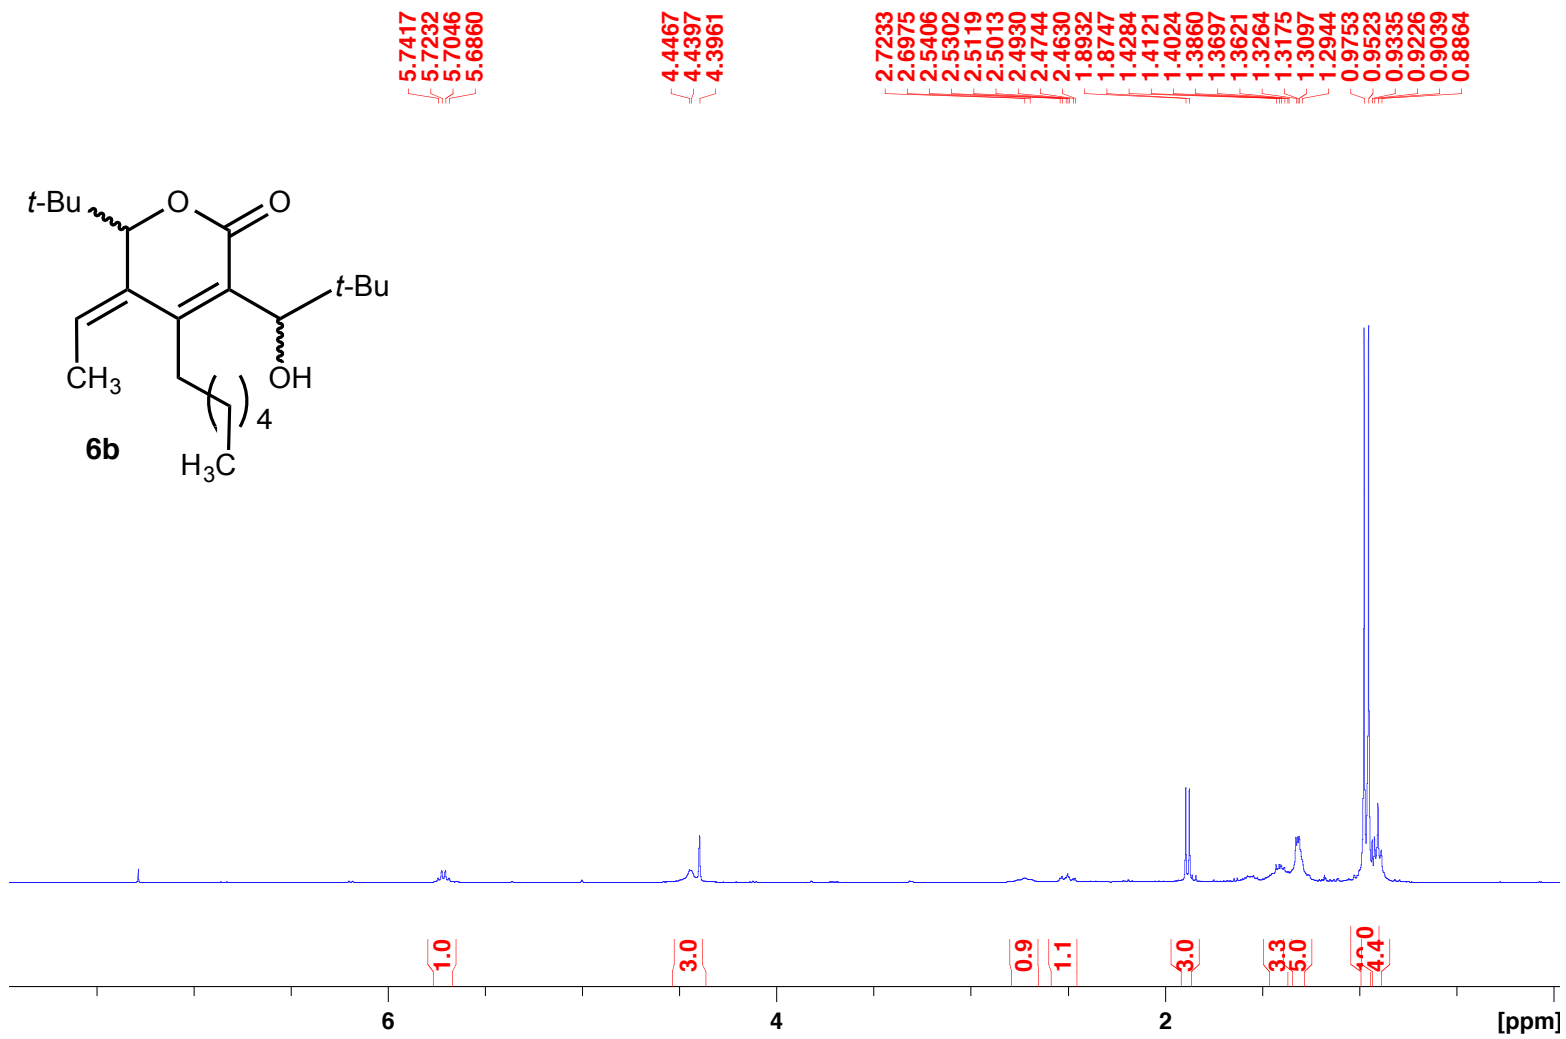

$^{13}\text{C}\{^1\text{H}\}$  NMR (100 MHz),  $\text{CDCl}_3$ , as a separable 1:1 mixture of *syn* and *anti* diastereomers

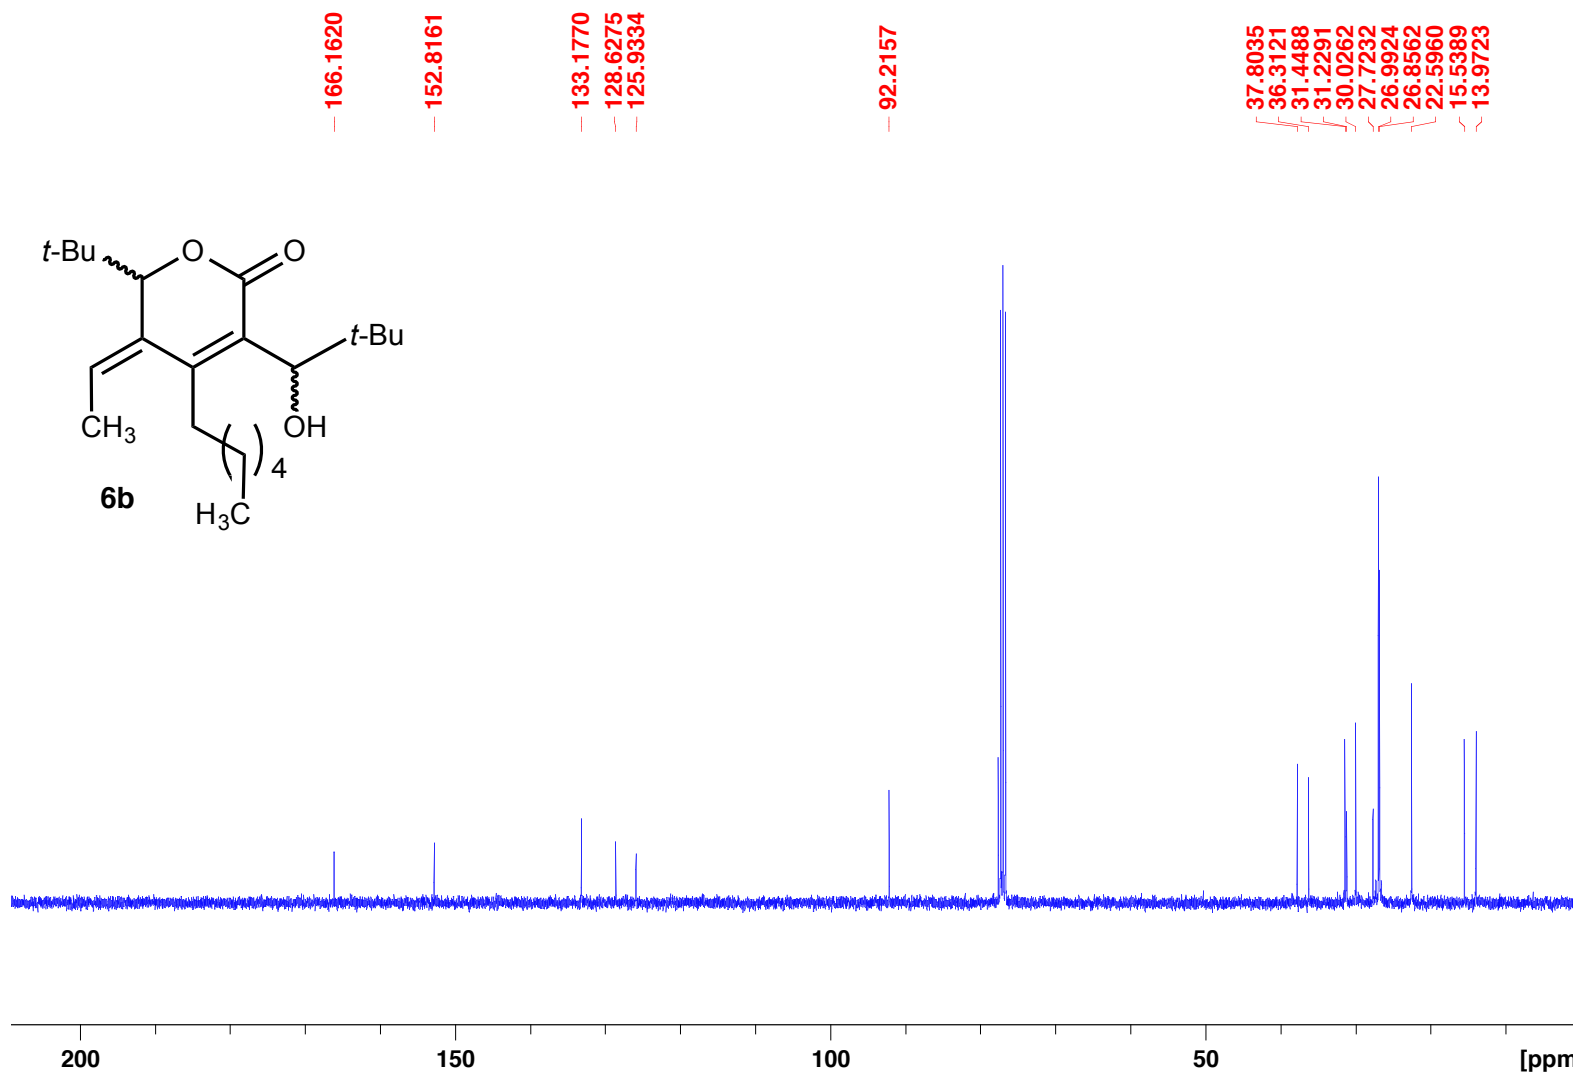

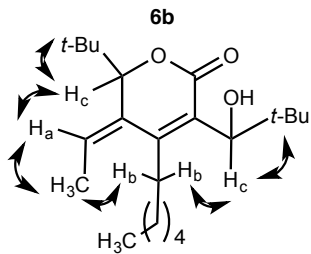

NOESY

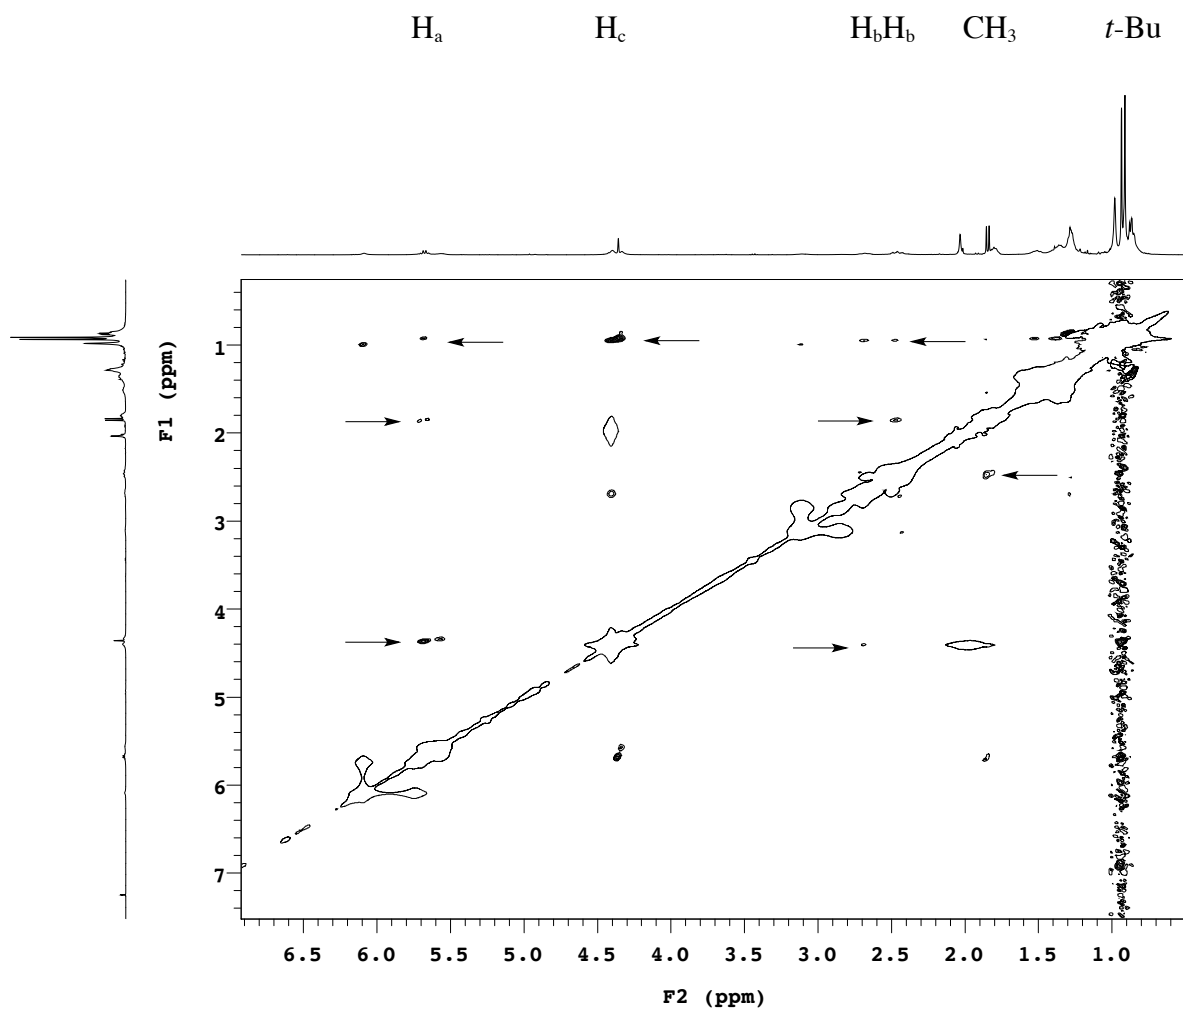

$^1\text{H}$  NMR (400 MHz),  $\text{CDCl}_3$ , as an inseparable 3:1 mixture of *Z* and *E* stereoisomers

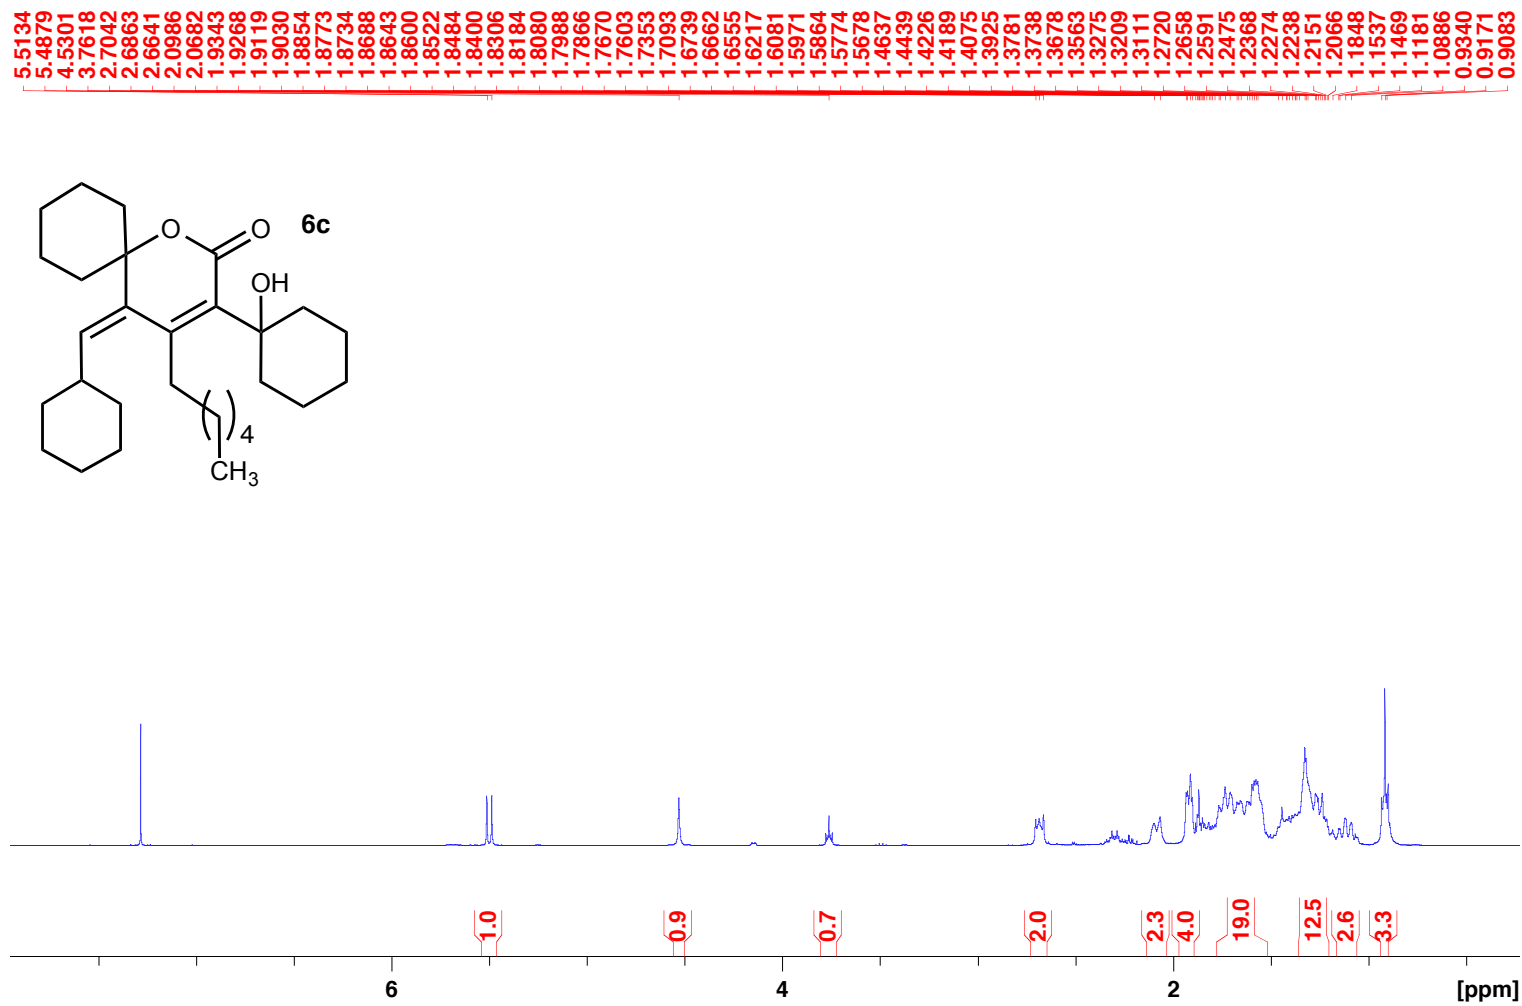

$^{13}\text{C}\{^1\text{H}\}$  NMR (100 MHz),  $\text{CDCl}_3$ , as an inseparable 3:1 mixture of *Z* and *E* stereoisomers

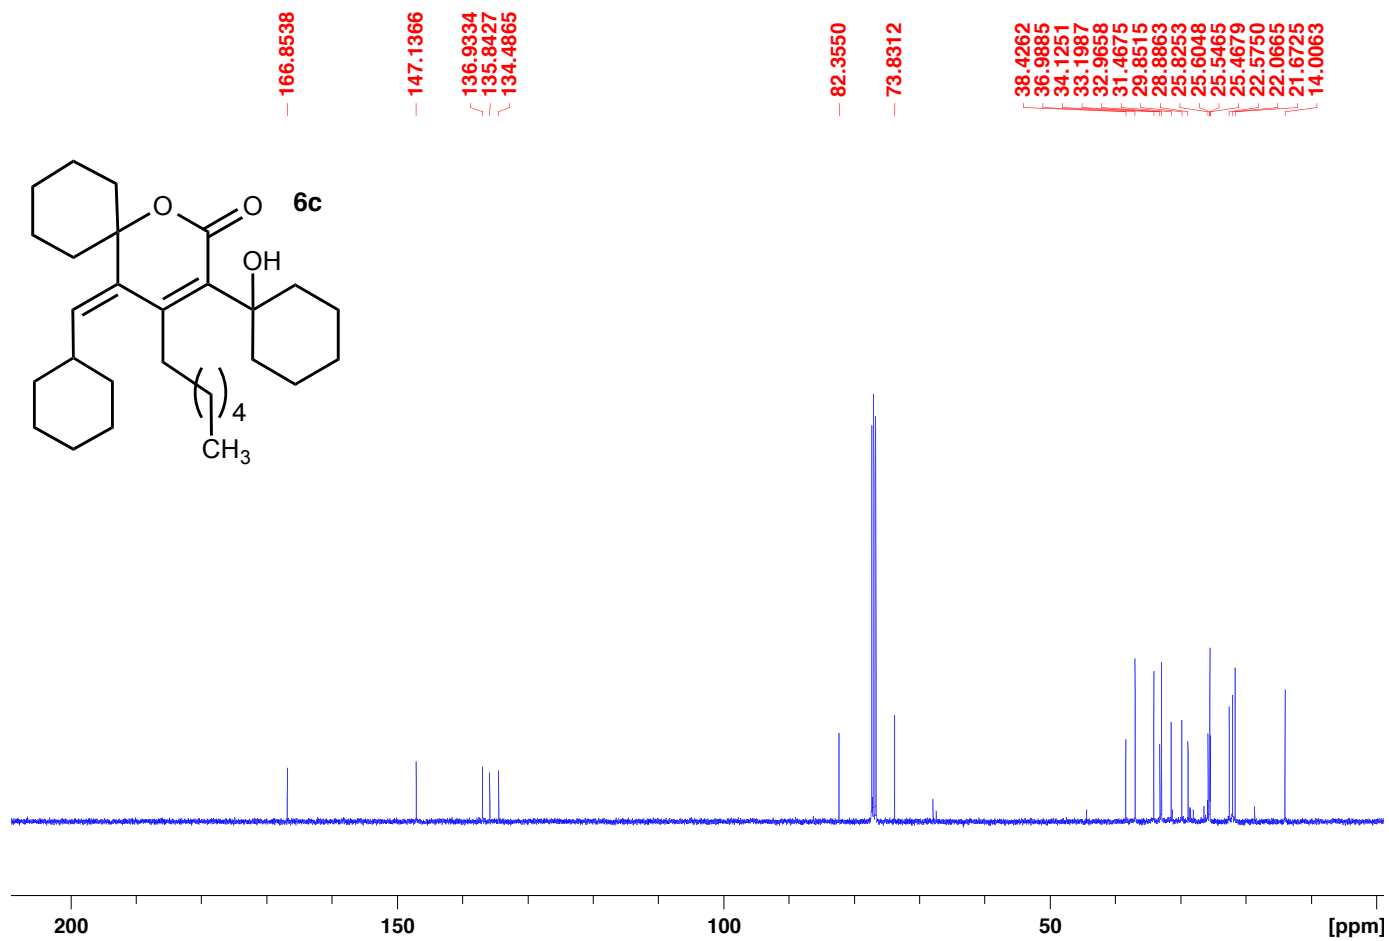

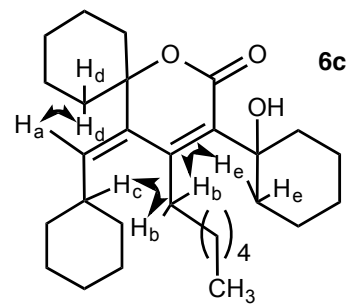

NOESY

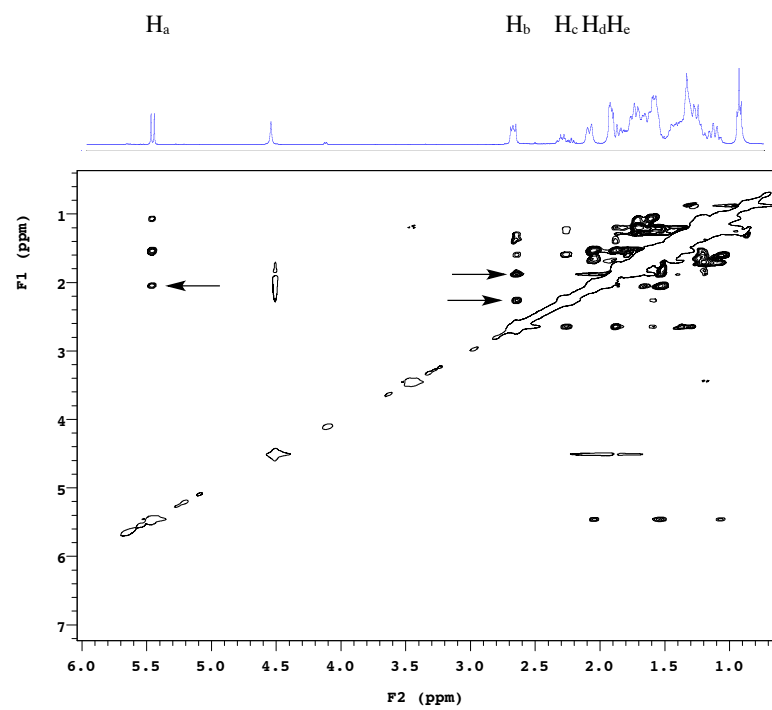

Supplement: d2ob02121h1.pdf [file d2ob02121h1.pdf]
